# Supplementary material
Source: PubMed Central journal article supplement (PMC2754784)

# Synthesis of Azepines by a Gold-Catalyzed Intermolecular [4+3]-Annulation

Nathan D. Shapiro and F. Dean Toste\*

*Department of Chemistry, University of California, Berkeley, California 94720*

## Supporting Information

### Table of Contents:

|             |                                                             |                  |
|-------------|-------------------------------------------------------------|------------------|
| <b>I.</b>   | <b>General Information</b>                                  | <b>S2</b>        |
| <b>II.</b>  | <b>Gold(III)-catalyzed [4+3] reaction</b>                   |                  |
|             | <b>a. General Procedure</b>                                 | <b>S2</b>        |
|             | <b>b. Characterization data</b>                             | <b>S2 - S8</b>   |
| <b>III.</b> | <b>Synthesis of PicAuCl<sub>2</sub> (4)</b>                 | <b>S9</b>        |
| <b>IV.</b>  | <b>Mechanistic Experiments</b>                              |                  |
|             | <b>a. Chirality transfer</b>                                | <b>S9</b>        |
|             | <b>b. Gold(III)-catalyzed oxidation of propargyl esters</b> | <b>S10 - S11</b> |
|             | <b>c. Hammett Plots</b>                                     | <b>S12</b>       |
| <b>V.</b>   | <b>NMR spectra</b>                                          | <b>S13 - S73</b> |

**General Information.** Unless otherwise noted, reagents were obtained commercially and used without further purification. Small scale reactions (< 3mL) were carried out in Fisher Scientific disposable scintillation vials. HPLC grade dichloromethane (CH<sub>2</sub>Cl<sub>2</sub>), ACS grade hexanes, and ACS grade ethyl acetate (EtOAc) were obtained from Fischer Scientific. TLC analysis of reaction mixtures was performed on Merck silica gel 60 F254 TLC plates using UV light and ceric ammonium molybdate stain to visualize the reaction components. Flash chromatography was carried out on ICN SiliTech 32-63 D 60 Å silica gel. <sup>1</sup>H and <sup>13</sup>C NMR spectra were recorded with Bruker AV-300, AVB-400, AVQ-400, DRX-500, and AV-500 spectrometers and referenced to CDCl<sub>3</sub> unless otherwise noted. Mass spectral and analytical data were obtained via the Micro-Mass/Analytical Facility operated by the College of Chemistry, University of California, Berkeley. X-ray structure acquisition and analysis were performed by Dr. Frederick J. Hollander of the University of California, Berkeley College of Chemistry X-ray crystallographic facility.

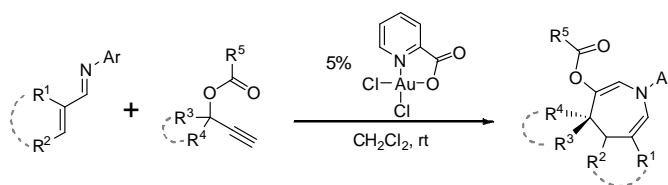

**General procedure for the gold(III)-catalyzed [4+3] reaction.** To a one dram vial equipped with a magnetic stir bar, was sequentially added N-aryl imine (~0.3 mmol, 1 equiv), propargyl ester (1.3 equiv), CH<sub>2</sub>Cl<sub>2</sub> (0.3 M) and PicAuCl<sub>2</sub> (0.05 equiv). The resulting mixture was stirred at room temperature and monitored periodically by TLC. Upon consumption of the imine (2 – 6 hrs), the reaction mixture was directly subjected to silica gel chromatography (hexanes/ethyl acetate/dichloromethane) to give the desired azepine products.

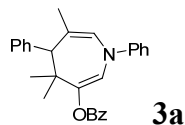

<sup>1</sup>H NMR (400 MHz, CDCl<sub>3</sub>) δ 7.91 (d, 2H, *J* = 8.0 Hz), 7.53 (t, 1H, *J* = 7.4 Hz), 7.41-7.24 (m, 11H), 7.09 (t, 1H, *J* = 7.2 Hz), 6.47 (s, 2H), 3.24 (s, 1H), 1.80 (s, 3H), 1.47 (s, 3H), 0.94 (s, 3H). <sup>13</sup>C NMR (100 MHz, CDCl<sub>3</sub>) δ 166.5, 147.6, 143.8, 138.5, 133.3, 130.1, 130.0, 129.9, 129.4, 128.6, 127.9, 126.6, 124.1, 123.6, 120.9, 115.8, 62.5, 42.8, 30.1, 26.3, 25.7. HRMS (FAB) calc. for [C<sub>28</sub>H<sub>27</sub>NO<sub>2</sub>]<sup>+</sup> 409.2042, found 409.2041.

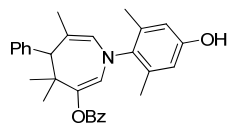

<sup>1</sup>H NMR (500 MHz, CDCl<sub>3</sub>) δ 7.93 (d, 2H, *J* = 8.0 Hz), 7.53-7.48 (m, 3H), 7.39-7.32 (m, 4H), 7.26 (t, 1H, *J* = 7.3 Hz), 6.56 (s, 1H), 6.53 (s, 1H), 5.99 (s, 1H), 5.72 (s, 1H), 5.71 (bs, 1H), 3.25 (s, 1H), 2.33 (s, 3H), 2.32 (s, 3H), 1.73 (s, 3H), 1.56 (s, 3H), 0.92 (s, 3H). <sup>13</sup>C NMR (125 MHz,

CDCl<sub>3</sub>) δ 167.3, 154.7, 145.3, 140.1, 139.0, 137.3, 133.7, 133.3, 130.1, 130.0, 130.0, 128.6, 127.8, 126.3, 126.0, 125.4, 115.1, 115.1, 112.2, 63.5, 43.0, 31.3, 26.9, 25.5, 18.7, 18.7. HRMS (FAB) calc. for [C<sub>30</sub>H<sub>31</sub>NO<sub>3</sub>]<sup>+</sup> 453.2304, found 453.2306.

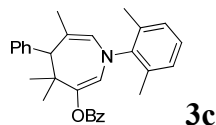

<sup>1</sup>H NMR (400 MHz, CDCl<sub>3</sub>) δ 7.91 (d, 2H, *J* = 7.2 Hz), 7.51-7.48 (m, 3H), 7.38-7.31 (m, 4H), 7.28-7.25 (m, 1H), 7.10 (s, 3H), 5.98 (s, 1H), 5.74 (s, 1H), 3.25 (s, 1H), 2.47 (s, 3H), 2.40 (s, 3H), 1.74 (s, 3H), 1.56 (s, 3H), 0.91 (s, 3H). <sup>13</sup>C NMR (75 MHz, CDCl<sub>3</sub>) δ 166.9, 162.6, 146.8, 145.4, 137.7, 136.0, 130.3, 130.2, 130.1, 129.0, 129.0, 128.6, 127.9, 127.7, 126.5, 125.5, 124.9, 112.5, 63.6, 43.2, 31.4, 27.0, 25.6, 18.8. HRMS (FAB) calc. for [C<sub>30</sub>H<sub>31</sub>NO<sub>2</sub>]<sup>+</sup> 437.2355, found 437.2362.

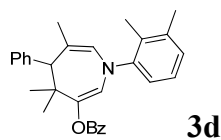

<sup>1</sup>H NMR (400 MHz, CDCl<sub>3</sub>) δ 7.91 (d, 2H, *J* = 8.0 Hz), 7.49 (t, 1H, *J* = 7.6 Hz), 7.47 (d, 2H, *J* = 8.0 Hz), 7.38-7.32 (m, 4H), 7.26 (t, 1H, *J* = 7.2 Hz), 7.19 (d, 1H, *J* = 7.6 Hz), 7.11 (t, 1H, *J* = 7.2 Hz), 7.06 (d, 1H, *J* = 7.2 Hz), 6.13 (s, 1H), 5.96 (s, 1H), 3.25 (s, 1H), 2.33 (s, 3H), 2.31 (s, 3H), 1.76 (s, 3H), 1.56 (s, 3H), 0.94 (s, 3H). <sup>13</sup>C NMR (100 MHz, CDCl<sub>3</sub>) δ 166.8, 148.1, 144.9, 138.7, 134.2, 133.6, 133.1, 130.2, 130.0, 130.0, 128.5, 128.3, 127.9, 126.5, 126.4, 126.3, 125.6, 125.3, 112.5, 63.2, 43.0, 30.9, 26.7, 25.5, 20.8, 14.8. HRMS (FAB) calc. for [C<sub>30</sub>H<sub>31</sub>NO<sub>2</sub>]<sup>+</sup> 437.2355, found 437.2346.

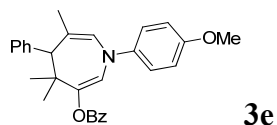

<sup>1</sup>H NMR (500 MHz, CDCl<sub>3</sub>) δ 7.92 (d, 2H, *J* = 7.5 Hz), 7.52 (t, 1H, *J* = 7.5 Hz), 7.41-7.36 (m, 4H), 7.32 (t, 2H, *J* = 7.5 Hz), 7.26 (t, 1H, *J* = 7.5 Hz), 7.21 (d, 2H, *J* = 9.0 Hz), 6.88 (d, 2H, *J* = 9.0 Hz), 6.38 (s, 1H), 6.34 (s, 1H), 3.81 (s, 3H), 3.24 (s, 1H), 1.80 (s, 3H), 1.48 (s, 3H), 0.94 (s, 3H). <sup>13</sup>C NMR (125 MHz, CDCl<sub>3</sub>) δ 166.6, 156.4, 144.2, 141.8, 136.8, 133.2, 130.1, 129.9, 128.5, 127.9, 126.5, 125.0, 124.1, 123.2, 114.6, 114.5, 62.7, 55.8, 42.9, 30.5, 26.4, 25.7. HRMS (FAB) calc. for [C<sub>29</sub>H<sub>29</sub>NO<sub>3</sub>]<sup>+</sup> 439.2147, found 439.2144.

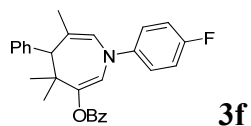

<sup>1</sup>H NMR (500 MHz, CDCl<sub>3</sub>) δ 7.91 (d, 2H, *J* = 7.5 Hz), 7.53 (t, 1H, *J* = 7.0 Hz), 7.40-7.35 (m, 4H), 7.31 (t, 2H, *J* = 7.5 Hz), 7.27-7.20 (m, 3H), 7.03 (t, 2H, *J* = 8.5 Hz), 6.38 (s, 1H), 6.36 (s,

1H), 3.23 (s, 1H), 1.79 (s, 3H), 1.46 (s, 3H), 0.94 (s, 3H). <sup>13</sup>C NMR (125 MHz, CDCl<sub>3</sub>) δ 166.5, 159.5 (d, *J* = 241 Hz), 144.1 (d, *J* = 4 Hz), 143.8, 138.1, 133.3, 130.1, 129.9, 129.9, 128.6, 127.9, 126.6, 124.4, 123.7, 122.9 (d, *J* = 8 Hz), 116.0 (d, *J* = 23 Hz), 115.6, 62.5, 42.9, 30.2, 26.3, 25.7. HRMS (FAB) calc. for [C<sub>28</sub>H<sub>26</sub>NO<sub>2</sub>F]<sup>+</sup> 427.1948, found 427.1954.

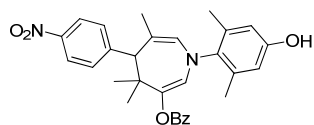

**6a**

<sup>1</sup>H NMR (400 MHz, CDCl<sub>3</sub>) δ 8.20 (d, 2H, *J* = 8.8 Hz), 7.92 (d, 2H, *J* = 7.6 Hz), 7.67 (d, 2H, *J* = 8.8 Hz), 7.53 (t, 1H, *J* = 7.6 Hz), 7.38 (t, 2H, *J* = 7.6 Hz), 6.57 (s, 1H), 6.55 (s, 1H), 6.02 (s, 1H), 5.77 (s, 1H), 5.77 (bs, 1H), 3.40 (s, 1H), 2.32 (s, 3H), 2.30 (s, 3H), 1.72 (s, 3H), 1.58 (s, 3H), 0.92 (s, 3H). <sup>13</sup>C NMR (100 MHz, CDCl<sub>3</sub>) δ 167.2, 154.9, 153.1, 146.7, 139.8, 138.7, 137.0, 133.5, 133.0, 130.6, 130.0, 129.7, 128.7, 127.0, 125.8, 123.1, 115.3, 115.2, 110.8, 63.3, 43.1, 31.4, 26.7, 25.3, 18.7, 18.6. HRMS (FAB) calc. for [C<sub>30</sub>H<sub>30</sub>N<sub>2</sub>O<sub>5</sub>]<sup>+</sup> 498.2155, found 498.2156

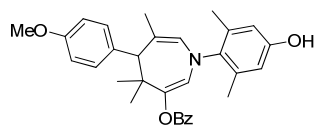

**6b**

<sup>1</sup>H NMR (500 MHz, CDCl<sub>3</sub>) δ 7.93 (d, 2H, *J* = 7.5 Hz), 7.52 (t, 1H, *J* = 7.5 Hz), 7.41 (d, 2H, *J* = 8.5 Hz), 7.38 (t, 2H, *J* = 8.0 Hz), 6.89 (d, 2H, *J* = 8.5 Hz), 6.55 (s, 1H), 6.53 (s, 1H), 5.97 (s, 1H), 5.69 (s, 1H), 5.68 (bs, 1H), 3.84 (s, 3H), 3.19 (s, 1H), 2.33 (s, 3H), 2.31 (s, 3H), 1.73 (s, 3H), 1.54 (s, 3H), 0.91 (s, 3H). <sup>13</sup>C NMR (125 MHz, CDCl<sub>3</sub>) δ 167.3, 158.2, 154.7, 139.0, 140.1, 139.0, 137.6, 137.3, 133.7, 133.3, 130.8, 130.1, 128.6, 125.8, 125.4, 115.1, 115.1, 113.2, 112.6, 62.6, 55.4, 43.1, 31.2, 26.9, 25.5, 18.7, 18.7. HRMS (FAB) calc. for [C<sub>31</sub>H<sub>33</sub>NO<sub>4</sub>]<sup>+</sup> 483.2410, found 483.2421.

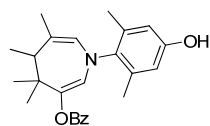

**8**

<sup>1</sup>H NMR (400 MHz, CDCl<sub>3</sub>) δ 8.10 (d, 2H, *J* = 8.0 Hz), 7.57 (t, 1H, *J* = 7.4 Hz), 7.45 (t, 2H, *J* = 8.0 Hz), 6.50 (s, 2H), 6.15 (bs, 1H), 5.77 (s, 1H), 5.52 (s, 1H), 2.23 (s, 3H), 2.16 (s, 3H), 2.13 (q, 1H, *J* = 7.0 Hz), 1.81 (s, 3H), 1.38 (s, 3H), 1.28 (d, 3H, *J* = 7.0 Hz), 1.15 (s, 3H). <sup>13</sup>C NMR (100 MHz, CDCl<sub>3</sub>) δ 167.9, 154.7, 140.0, 138.3, 138.1, 133.3, 132.1, 130.3, 130.1, 128.6, 125.6, 125.1, 117.6, 115.0, 114.8, 50.2, 43.2, 31.5, 26.7, 25.1, 18.3, 18.2, 17.3. HRMS (FAB) calc. for [C<sub>25</sub>H<sub>29</sub>NO<sub>3</sub>]<sup>+</sup> 391.2147, found 391.2153.

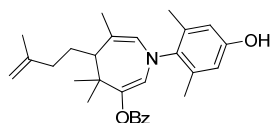

**10**

$^1\text{H}$  NMR (400 MHz,  $\text{CDCl}_3$ )  $\delta$  8.08 (d, 2H,  $J = 7.4$  Hz), 7.56 (t, 1H,  $J = 7.4$  Hz), 7.42 (t, 2H,  $J = 7.4$  Hz), 6.50 (d, 1H,  $J = 3.0$  Hz), 6.48 (d, 1H,  $J = 3.0$  Hz), 5.72 (s, 1H), 5.62 (s, 1H), 5.51 (bs, 1H), 4.75 (s, 1H), 4.74 (s, 1H), 2.32-2.26 (m, 1H), 2.26 (s, 3H), 2.16 (s, 3H), 2.12-2.02 (m, 2H), 1.99 (app t, 2H,  $J = 7.8$  Hz), 1.83 (s, 3H), 1.77 (s, 3H), 1.36 (s, 3H), 1.19 (s, 3H).  $^{13}\text{C}$  NMR (125 MHz,  $\text{CDCl}_3$ )  $\delta$  167.7, 154.5, 146.8, 140.2, 138.3, 138.1, 133.3, 132.1, 130.4, 130.1, 128.6, 126.4, 124.9, 117.0, 115.1, 114.7, 109.9, 55.8, 43.4, 36.4, 31.9, 29.9, 27.0, 26.9, 23.0, 18.4, 18.2. HRMS (FAB) calc. for  $[\text{C}_{29}\text{H}_{35}\text{NO}_3]^+$  445.2617, found 445.2619.

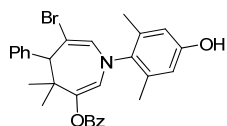

**12**

$^1\text{H}$  NMR (400 MHz,  $\text{CDCl}_3$ )  $\delta$  7.90 (d, 2H,  $J = 7.6$  Hz), 7.53 (t, 1H,  $J = 7.4$  Hz), 7.47 (d, 2H,  $J = 7.0$  Hz), 7.41-7.35 (m, 4H), 7.32 (t, 1H,  $J = 7.0$  Hz), 6.56 (s, 1H), 6.53 (s, 1H), 6.40 (s, 1H), 6.01 (s, 1H), 5.60 (bs, 1H), 3.84 (s, 1H), 2.34 (s, 3H), 2.32 (s, 3H), 1.68 (s, 3H), 0.92 (s, 3H).  $^{13}\text{C}$  NMR (100 MHz,  $\text{CDCl}_3$ )  $\delta$  166.9, 155.1, 143.2, 139.0, 138.8, 137.1, 135.5, 133.6, 131.4, 130.1, 129.8, 129.5, 128.7, 128.2, 127.1, 125.2, 115.3, 100.1, 67.6, 44.2, 30.7, 26.6, 18.7, 18.6. HRMS (FAB) calc. for  $[\text{C}_{29}\text{H}_{28}\text{NO}_3\text{BrNa}]^+$  540.1150, found 540.1147.

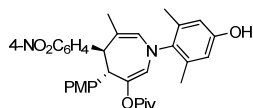

**14**

A single isomer was detected by  $^1\text{H}$  NMR.  $^1\text{H}$  NMR (500 MHz,  $\text{CDCl}_3$ )  $\delta$  8.20 (d, 2H,  $J = 8.3$  Hz), 7.78 (d, 2H,  $J = 8.3$  Hz), 7.39 (d, 2H,  $J = 8.5$  Hz), 6.88 (d, 2H,  $J = 8.5$  Hz), 6.54 (s, 1H), 6.47 (s, 1H), 5.98 (s, 1H), 5.84 (s, 1H), 5.40 (bs, 1H), 4.12 (d, 1H,  $J = 3.0$  Hz), 3.82 (d, 1H,  $J = 3.0$  Hz), 3.82 (s, 3H), 2.30 (s, 3H), 1.99 (s, 3H), 1.62 (s, 3H), 1.05 (s, 9H).  $^{13}\text{C}$  NMR (125 MHz,  $\text{CDCl}_3$ )  $\delta$  178.4, 158.4, 154.7, 152.3, 146.5, 139.6, 137.9, 137.8, 136.4, 130.2, 129.3, 129.2, 128.4, 127.7, 123.6, 115.4, 115.0, 113.8, 113.1, 55.4, 54.7, 52.7, 38.9, 27.2, 25.7, 18.6, 18.4. HRMS (FAB) calc. for  $[\text{C}_{33}\text{H}_{36}\text{N}_2\text{O}_6]^+$  556.2573, found 556.2558. X-ray quality crystals were grown from ethanol. Views showing azepine ring and *trans* stereochemistry:

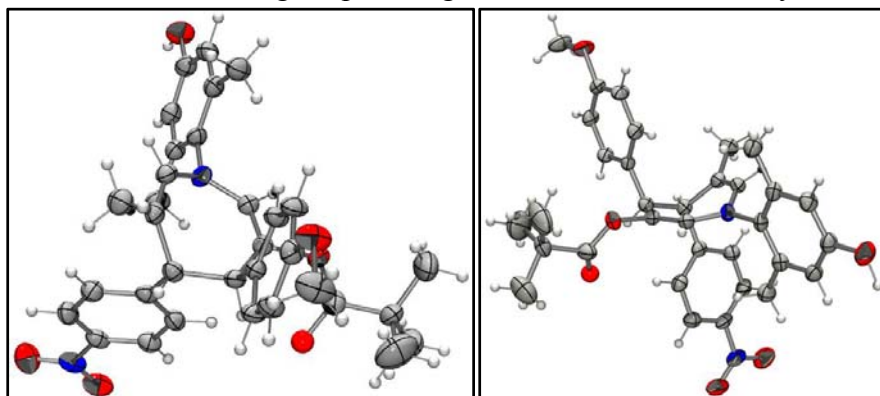

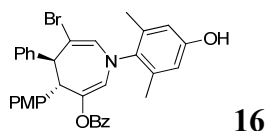

A single isomer was detected by  $^1\text{H}$  NMR.  $^1\text{H}$  NMR (400 MHz,  $\text{CDCl}_3$ )  $\delta$  7.86 (d, 2H,  $J = 7.6$  Hz), 7.66 (d, 2H,  $J = 7.6$  Hz), 7.54-7.48 (m, 3H), 7.43 (t, 2H,  $J = 7.6$  Hz), 7.38-7.29 (m, 3H), 6.94 (d, 2H,  $J = 8.4$  Hz), 6.50 (s, 2H), 6.48 (s, 1H), 6.20 (s, 1H), 5.28 (bs, 1H), 4.50 (d, 1H,  $J = 2.8$  Hz), 4.25 (d, 1H,  $J = 2.8$  Hz), 3.84 (s, 3H), 2.23 (s, 3H), 2.19 (s, 3H).  $^{13}\text{C}$  NMR (100 MHz,  $\text{CDCl}_3$ )  $\delta$  165.8, 158.5, 154.9, 143.3, 138.9, 137.9, 137.8, 135.7, 134.0, 133.4, 131.3, 130.0, 129.9, 129.2, 128.6, 128.5, 128.3, 127.2, 127.0, 115.3, 115.2, 114.0, 99.7, 59.4, 55.5, 54.8, 18.5. HRMS (FAB) calc. for  $[\text{C}_{34}\text{H}_{30}\text{NO}_4\text{Br}]^+$  595.1358, found 595.1357.

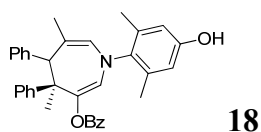

Obtained as an inseparable 3.3:1 mixture of diastereomers.  $^1\text{H}$  NMR (400 MHz,  $\text{CDCl}_3$ ) Major diastereomer:  $\delta$  7.60 (d, 2H,  $J = 8.0$  Hz), 7.41-7.03 (m, 13H), 6.59 (s, 2H), 6.21 (s, 1H), 5.81 (s, 1H), 5.60 (bs, 1H), 3.49 (s, 1H), 2.47 (s, 3H), 2.44 (s, 3H), 1.96 (s, 3H), 1.68 (s, 3H). Minor diastereomer:  $\delta$  7.92 (d, 2H,  $J = 8.0$  Hz), 7.75 (d, 2H,  $J = 7.6$  Hz), 7.71 (d, 2H,  $J = 7.6$  Hz), 7.50 (t, 1H,  $J = 7.2$  Hz), 7.41-7.03 (m, 8H), 6.50 (s, 2H), 6.40 (s, 1H), 5.60 (bs, 1H), 5.51 (s, 1H), 3.98 (s, 1H), 2.28 (s, 3H), 2.03 (s, 3H), 1.58 (s, 3H), 1.29 (s, 3H).  $^{13}\text{C}$  NMR (100 MHz,  $\text{CDCl}_3$ )  $\delta$  167.3, 155.0, 149.7, 144.4, 143.9, 143.4, 140.2, 139.9, 139.0, 138.3, 137.6, 137.2, 133.4, 133.1, 131.1, 130.8, 130.7, 130.0, 129.8, 129.2, 128.6, 128.3, 128.2, 128.0, 127.5, 127.4, 127.3, 127.0, 126.7, 126.6, 126.4, 126.0, 125.9, 116.1, 115.3, 115.1, 113.6, 63.9, 61.5, 52.2, 52.0, 29.0, 28.7, 25.3, 24.8, 19.0, 18.6, 18.4, 15.4. HRMS (FAB) calc. for  $[\text{C}_{35}\text{H}_{33}\text{NO}_3]^+$  515.2460, found 515.2463.

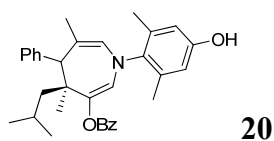

Obtained as an inseparable 1.4:1 mixture of diastereomers.  $^1\text{H}$  NMR (400 MHz,  $\text{CDCl}_3$ ) Major diastereomer:  $\delta$  7.99-7.90 (m, 2H), 7.59-7.22 (m, 8H), 6.58 (s, 1H), 6.54 (s, 1H), 6.17 (bs, 1H), 6.12 (s, 1H), 5.70 (s, 1H), 3.35 (s, 1H), 2.35 (s, 3H), 2.30 (s, 3H), 2.04 (app sept, 1H,  $J = 6.0$  Hz), 1.97-1.92 (m, 1H), 1.76 (s, 3H), 1.11 (d, 3H,  $J = 6.4$  Hz), 1.08 (d, 3H,  $J = 6.4$  Hz), 0.96 (s, 3H). Minor diastereomer:  $\delta$  7.99-7.90 (m, 2H), 7.59-7.22 (m, 8H), 6.56 (s, 1H), 6.53 (s, 1H), 6.17 (bs, 1H), 5.99 (s, 1H), 5.70 (s, 1H), 3.53 (s, 1H), 2.33 (s, 3H), 2.26 (s, 3H), 1.87-1.79 (m, 1H), 1.78 (s, 3H), 1.33-1.27 (m, 1H), 1.22-1.77 (m, 1H), 0.81 (d, 3H,  $J = 6.4$  Hz), 0.80 (d, 3H,  $J = 6.4$  Hz).  $^{13}\text{C}$  NMR (100 MHz,  $\text{CDCl}_3$ )  $\delta$  167.6, 166.7, 154.9, 145.0, 144.9, 140.2, 140.0, 138.7, 138.3, 137.6, 137.3, 134.8, 133.4, 133.3, 132.8, 130.5, 130.3, 130.2, 130.1, 130.0, 128.6, 128.2, 128.0, 127.9, 127.8, 126.3, 126.2, 126.0, 126.0, 125.8, 115.2, 115.1, 112.5, 112.3, 62.0, 60.6,

53.4, 46.7, 46.3, 45.6, 27.3, 26.1, 25.9, 25.8, 25.5, 25.4, 25.1, 25.0, 23.9, 23.6, 18.8, 18.8, 18.7, 18.6 . HRMS (FAB) calc. for  $[C_{33}H_{37}NO_3]^+$  495.2773, found 495.2768.

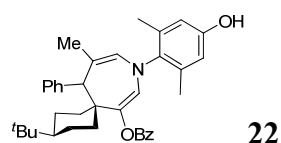

Prepared by slight modification the general procedure. Imine (1 eq), propargyl ester (2 eq) and PicAuCl<sub>2</sub> (10 mol %) were stirred in dichloroethane (0.3M) at 60°C overnight. NMR analysis of the crude reaction mixture indicated a 2.5:1 ratio of diastereomers. Chromatography (10% → 20% EtOAc in hexanes) provided the diastereomeric mixture as a pale yellow foam (68 mg, 58% yield). <sup>1</sup>H NMR (500 MHz, CDCl<sub>3</sub>) Major diastereomer: δ 7.82 (d, 2H, *J* = 8.0 Hz), 7.59-7.26 (m, 8H), 6.58 (s, 2H), 6.19 (s, 1H), 5.96 (bs, 1H), 5.79 (s, 1H), 3.26 (s, 1H), 2.67 (app d, 1H, *J* = 11.5 Hz), 2.36 (s, 3H), 2.34 (s, 3H), 1.89-0.98 (m, 8H), 1.69 (s, 3H), 0.77 (s, 9H). Minor diastereomer: δ 7.93 (d, 2H, *J* = 7.5 Hz), 7.59-7.26 (m, 8H), 6.54 (s, 2H), 6.02 (s, 1H), 5.96 (bs, 1H), 5.77 (s, 1H), 3.99 (s, 1H), 2.42 (app d, 1H, *J* = 11.0 Hz), 2.33 (s, 3H), 2.32 (s, 3H), 1.89-0.98 (m, 8H), 1.79 (s, 3H), 0.92 (s, 9H). <sup>13</sup>C NMR (100 MHz, CDCl<sub>3</sub>) δ 167.5, 165.9, 154.8, 144.8, 144.4, 139.9, 139.9, 139.0, 138.8, 137.2, 137.1, 135.9, 133.4, 133.1, 130.6, 130.2, 130.2, 130.1, 130.0, 129.8, 128.6, 128.6, 127.9, 127.6, 126.8, 126.7, 126.4, 126.3, 126.2, 125.8, 115.2, 115.1, 110.8, 110.5, 65.2, 51.8, 48.0, 47.4, 46.3, 45.3, 38.1, 37.4, 36.3, 32.6, 32.5, 30.5, 27.7, 25.5, 25.4, 25.0, 23.8, 23.4, 21.6, 18.8, 18.8. HRMS (FAB) calc. for  $[C_{37}H_{43}NO_3]^+$  549.3243, found 549.3227.

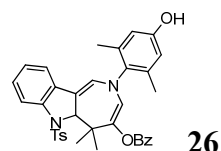

Prepared by slight modification the general procedure. Imine (1 eq), propargyl ester (2 eq) and PicAuCl<sub>2</sub> (10 mol %) were stirred in dichloroethane (0.3M) at 60°C overnight. Chromatography provided the desired compound as a yellow powder. <sup>1</sup>H NMR (400 MHz, CDCl<sub>3</sub>) δ 8.10 (d, 2H, *J* = 7.2 Hz), 7.67 (d, 1H, *J* = 8.0 Hz), 7.59 (t, 1H, *J* = 7.4 Hz), 7.46 (t, 2H, *J* = 7.6 Hz), 7.36 (d, 2H, *J* = 8.0 Hz), 7.11 (td, 1H, *J* = 7.2, 1.6 Hz), 7.05 (d, 2H, *J* = 8.0 Hz), 7.02-6.95 (m, 2H), 6.55 (s, 1H), 6.53 (s, 1H), 6.22 (s, 1H), 5.87 (s, 1H), 5.40 (bs, 1H), 4.77 (s, 1H), 2.30 (s, 3H), 2.27 (s, 3H), 2.03 (s, 3H), 1.62 (s, 3H), 1.00 (s, 3H). <sup>13</sup>C NMR (100 MHz, CDCl<sub>3</sub>) δ 167.3, 155.3, 143.9, 142.2, 138.4, 138.0, 137.3, 134.5, 133.8, 133.6, 133.4, 130.2, 129.8, 129.3, 128.7, 128.0, 126.5, 125.9, 125.9, 122.7, 119.7, 118.0, 115.4, 115.0, 114.9, 71.2, 48.1, 24.5, 23.4, 21.7, 18.1, 17.8 . HRMS (FAB) calc. for  $[C_{36}H_{34}N_2O_5S]^+$  606.2188, found 606.2195.

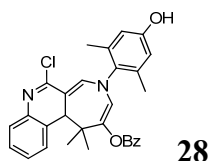

$^1\text{H}$  NMR (500 MHz,  $\text{CDCl}_3$ )  $\delta$  8.08 (d, 2H,  $J = 8.0$  Hz), 7.60 (t, 1H,  $J = 7.3$  Hz), 7.47 (t, 2H,  $J = 7.5$  Hz), 7.41 (d, 1H,  $J = 8.0$  Hz), 7.31 (s, 1H), 7.30 (t, 1H,  $J = 7.5$  Hz), 7.25 (d, 2H,  $J = 8.0$  Hz), 7.18 (t, 1H,  $J = 7.3$  Hz), 6.66 (s, 1H), 6.61 (s, 1H), 6.01 (s, 1H), 3.93 (s, 1H), 2.33 (s, 3H), 2.22 (s, 3H), 1.19 (s, 3H), 1.07 (s, 3H).  $^{13}\text{C}$  NMR (125 MHz,  $\text{CDCl}_3$ )  $\delta$  166.5, 155.1, 144.5, 144.1, 133.8, 132.0, 130.2, 129.5, 128.8, 128.5, 127.4, 126.0, 125.7, 125.6, 115.9, 115.3, 49.9, 48.5, 26.3, 24.5, 18.1, 18.0, 14.4. HRMS (FAB) calc. for  $[\text{C}_{30}\text{H}_{27}\text{N}_2\text{O}_3\text{Cl}]^+$  498.1710, found 498.1712.

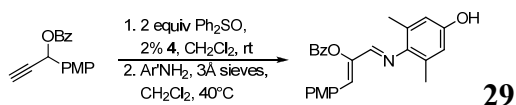

To a one dram vial equipped with a magnetic stir bar, was added propargyl ester (233mg, 0.875 mmol, 1 equiv), diphenylsulfoxide (353mg, 1.75 mmol, 2 equiv) and  $\text{CH}_2\text{Cl}_2$  (2.9 mL). The mixture was cooled to  $10^\circ\text{C}$  and  $\text{PicAuCl}_2$  (6.8 mg, 0.017 mmol, 2 mol %) was added. The cooling bath was subsequently removed and the mixture was stirred for 1 hour at which point TLC analysis indicated consumption of the propargyl ester.  $3\text{\AA}$  molecular sieves (250 mg) and 4-hydroxy-2,6-dimethylaniline (132 mg, 0.962 mmol, 1.1 equiv) were added and the solution was stirred at  $40^\circ\text{C}$  overnight. After cooling to room temperature, the mixture was subjected twice to silica gel chromatography (first with 1% triethylamine in 10%  $\rightarrow$  50% EtOAc in hexanes, and then with 20  $\rightarrow$  35% EtOAc in hexanes) to yield the desired imine as a yellow solid (204 mg, 58% yield).  $^1\text{H}$  NMR (500 MHz,  $\text{CDCl}_3$ )  $\delta$  8.25 (d, 2H,  $J = 7.5$  Hz), 7.82 (s, 1H), 7.64-7.60 (m, 3H), 7.50 (t, 2H,  $J = 7.5$  Hz), 7.86 (d, 2H,  $J = 8.0$  Hz), 6.67 (s, 1H), 6.43 (s, 2H), 5.25 (bs, 1H), 3.80 (s, 3H), 2.04 (s, 6H).  $^{13}\text{C}$  NMR (125 MHz,  $\text{CDCl}_3$ )  $\delta$  164.4, 160.6, 157.4, 152.2, 144.2, 143.8, 133.7, 131.6, 130.6, 129.6, 129.5, 129.2, 128.8, 125.9, 114.9, 114.5, 55.5, 18.7, 14.4.

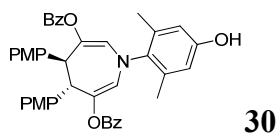

Obtained as an inseparable 20:1 mixture of diastereomers.  $^1\text{H}$  NMR (500 MHz,  $\text{CDCl}_3$ ) Major diastereomer:  $\delta$  7.88 (d, 4H,  $J = 8.0$  Hz), 7.57 (d, 4H,  $J = 8.5$  Hz), 7.50 (t, 2H,  $J = 7.5$  Hz), 7.35 (t, 4H,  $J = 7.5$  Hz), 6.94 (d, 4H,  $J = 8.5$  Hz), 6.52 (s, 2H), 6.26 (s, 2H), 5.70 (bs, 1H), 4.16 (s, 2H), 3.81 (s, 6H), 2.35 (s, 6H). Additionally, the following peaks were assigned to the minor diastereomer: 8.11 (d, 4H,  $J = 7.5$  Hz), 7.80 (d, 4H,  $J = 7.5$  Hz), 6.67 (m, 6H), 6.18 (s, 2H), 4.52 (s, 2H), 3.72 (s, 6H), 2.44 (s, 6H).  $^{13}\text{C}$  NMR (125 MHz,  $\text{CDCl}_3$ )  $\delta$  166.1, 158.4, 138.1, 136.1, 133.3, 131.1, 130.4, 130.1, 130.0, 129.6, 128.7, 128.5, 127.1, 115.2, 113.8, 55.4, 53.4, 18.6. HRMS (FAB) calc. for  $[\text{C}_{42}\text{H}_{37}\text{NO}_7]^+$  667.2570, found 667.2568.



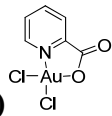

### Synthesis of PicAuCl<sub>2</sub> (4)

Prepared according to Dar *et. al.*<sup>1</sup> As such, 2-picolinic acid (175mg, 1.42 mmol) in water (14 mL) was added slowly to a stirred solution of sodium tetrachloroaurate (III) hydrate (283mg, 0.71 mmol) in 14 mL of water. After 3 hours, the resulting solution was filtered through celite. The yellow precipitate rinsed with water (15 mL) and eluted with acetone. Concentration *in vacuo* provided the desired dichloro(pyridine-2-carboxylato)gold(III) complex (PicAuCl<sub>2</sub>, **4**) as a yellow powder (190mg, 68% yield). <sup>1</sup>H NMR (400 MHz, acetone-d<sub>6</sub>) δ 9.31 (d, 1H, *J* = 6.0 Hz), 8.69 (t, 1H, *J* = 7.6 Hz), 8.26 (app t, 1H, *J* = 6.8 Hz), 8.20 (d, 1H, *J* = 7.6 Hz).

### Chirality Transfer Experiment

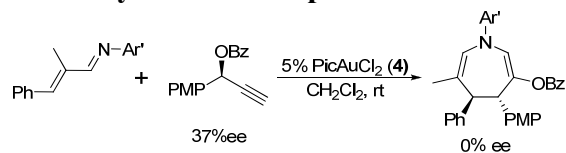

Subjecting enantioenriched propargyl ester **15** (37% ee) to the standard reaction conditions produced racemic azepine product.

<sup>1</sup> Dar, A.; Moss, K.; Cottrill, S. M.; Parish, R. V.; McAuliffe, C. A.; Pritchard, R. G.; Beagley, B.; Sandbank, J. *J. Chem. Soc. Dalton Trans.* **1992**, 1907.

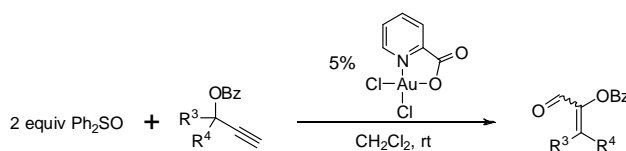

**General procedure for the gold(III)-catalyzed oxidation of propargyl esters.** To a one dram vial equipped with a magnetic stir bar, was sequentially added propargyl ester (1 equiv), diphenylsulfoxide (2 equiv),  $\text{CH}_2\text{Cl}_2$  (0.3M) and  $\text{PicAuCl}_2$  (5 mol %). The resulting mixture was stirred at room temperature and monitored periodically by TLC. Upon consumption of the propargyl ester (15-30 min), an aliquot was removed from the reaction mixture for  $^1\text{H-NMR}$  analysis of the resulting diastereomeric ratio. The reaction mixture was subsequently subjected to silica gel chromatography to give the desired aldehydes.

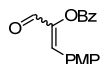

NMR analysis of the crude reaction mixture indicated a 12:1 *Z:E* ratio. Chromatography (2%  $\rightarrow$  20% EtOAc in Hexanes) provided the minor *E* diastereomer as a clear oil (38.1 mg, 7% yield).  $^1\text{H NMR}$  (500 MHz,  $\text{CDCl}_3$ )  $\delta$  9.82 (s, 1H), 8.16 (d, 2H,  $J = 7.5$  Hz), 7.63 (t, 1H,  $J = 7.5$  Hz), 7.52-7.48 (m, 3H), 7.42 (d, 2H,  $J = 8.5$  Hz), 6.97 (d, 2H,  $J = 8.5$  Hz), 3.87 (s, 3H).  $^{13}\text{C NMR}$  (125 MHz,  $\text{CD}_2\text{Cl}_2$ )  $\delta$  184.3, 165.0, 161.7, 145.8, 137.8, 134.2, 132.3, 130.8, 129.1, 129.0, 123.9, 114.8, 55.9. The major *Z* diastereomer was isolated as a mixture with diphenylsulfoxide, further silica gel chromatography (1% EtOAc in benzene) provided the major *Z* as a clear oil (350 mg, 66% yield).  $^1\text{H NMR}$  (500 MHz,  $\text{CD}_2\text{Cl}_2$ )  $\delta$  9.47 (s, 1H), 8.23 (d, 2H,  $J = 7.5$  Hz), 7.69-7.66 (m, 3H), 7.54 (t, 1H,  $J = 7.5$  Hz), 7.08 (s, 1H), 6.90 (d, 2H,  $J = 8.5$  Hz), 3.82 (s, 3H).  $^{13}\text{C NMR}$  (125 MHz,  $\text{CD}_2\text{Cl}_2$ )  $\delta$  185.5, 163.6, 162.0, 144.8, 137.2, 134.2, 132.7, 130.7, 129.0, 128.8, 124.6, 114.8, 55.6. HRMS (EI) calc. for  $[\text{C}_{17}\text{H}_{14}\text{O}_4]^+$  282.0892, found 282.0889.

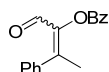

NMR analysis of the crude reaction mixture indicated a 4.1:1 *E:Z* ratio. Chromatography (2%  $\rightarrow$  10% EtOAc in hexanes) provided first the major *E* diastereomer as a clear oil (37.5 mg, 72% yield).  $^1\text{H NMR}$  (500 MHz,  $\text{CD}_2\text{Cl}_2$ )  $\delta$  9.39 (s, 1H), 8.18 (d, 2H,  $J = 7.5$  Hz), 7.68 (t, 1H,  $J = 7.5$  Hz), 7.55 (t, 2H,  $J = 7.5$  Hz), 7.50-7.45 (m, 5H), 2.29 (s, 3H).  $^{13}\text{C NMR}$  (125 MHz,  $\text{CD}_2\text{Cl}_2$ )  $\delta$  184.5, 164.4, 150.2, 144.8, 137.0, 134.3, 130.7, 129.9, 129.6, 129.4, 129.2, 129.1, 20.5. Followed by the major *Z* diastereomer as a clear oil (9.5 mg, 18% yield).  $^1\text{H NMR}$  (500 MHz,  $\text{CD}_2\text{Cl}_2$ )  $\delta$  10.09 (s, 1H), 7.94 (d, 2H,  $J = 7.5$  Hz), 7.58 (t, 1H,  $J = 7.5$  Hz), 7.45-7.39 (m, 4H), 7.37-7.29 (m, 3H), 2.61 (s, 3H).  $^{13}\text{C NMR}$  (125 MHz,  $\text{CD}_2\text{Cl}_2$ )  $\delta$  183.4, 165.0, 146.4, 142.6, 138.5, 134.1, 130.5, 129.5, 129.3, 129.1, 128.9, 127.7, 18.3. HRMS (EI) calc. for  $[\text{C}_{17}\text{H}_{14}\text{O}_3]^+$  266.0943, found 266.0943.

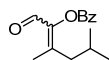

NMR analysis of the crude reaction mixture indicated a 1.2:1 *Z:E* ratio. Chromatography (2% → 10% EtOAc in Hexanes) provided first the minor *E* diastereomer as a clear oil (17.4 mg, 35% yield). <sup>1</sup>H NMR (500 MHz, CD<sub>2</sub>Cl<sub>2</sub>) δ 9.89 (s, 1H), 8.12 (d, 2H, *J* = 7.5 Hz), 7.65 (t, 1H, *J* = 7.5 Hz), 7.51 (t, 2H, *J* = 7.5 Hz), 2.56 (d, 2H, *J* = 7.5 Hz), 1.98 (nonet, 1H, *J* = 6.8 Hz), 1.92 (s, 3H), 1.03 (d, 6H, *J* = 6.5 Hz). <sup>13</sup>C NMR (125 MHz, CD<sub>2</sub>Cl<sub>2</sub>) δ 182.0, 164.5, 150.3, 144.6, 134.1, 130.6, 129.6, 129.1, 40.9, 28.0, 22.6, 18.5. Followed by the major *Z* diastereomer as a clear oil (19.7 mg, 40% yield). <sup>1</sup>H NMR (500 MHz, CD<sub>2</sub>Cl<sub>2</sub>) δ 9.92 (s, 1H), 8.11 (d, 2H, *J* = 7.5 Hz), 7.65 (t, 1H, *J* = 7.5 Hz), 7.51 (t, 2H, *J* = 7.5 Hz), 2.27 (s, 3H), 2.18 (d, 2H, *J* = 7.5 Hz), 1.94 (nonet, 1H, *J* = 6.5 Hz), 0.93 (d, 6H, *J* = 6.5 Hz). <sup>13</sup>C NMR (125 MHz, CD<sub>2</sub>Cl<sub>2</sub>) δ 182.6, 164.6, 149.5, 143.8, 134.1, 130.5, 129.6, 129.2, 43.1, 27.4, 22.9, 16.7. HRMS (EI) calc. for [C<sub>15</sub>H<sub>18</sub>O<sub>3</sub>]<sup>+</sup> 246.1256, found 246.1258.

Comparison of observed diastereoselectivities:

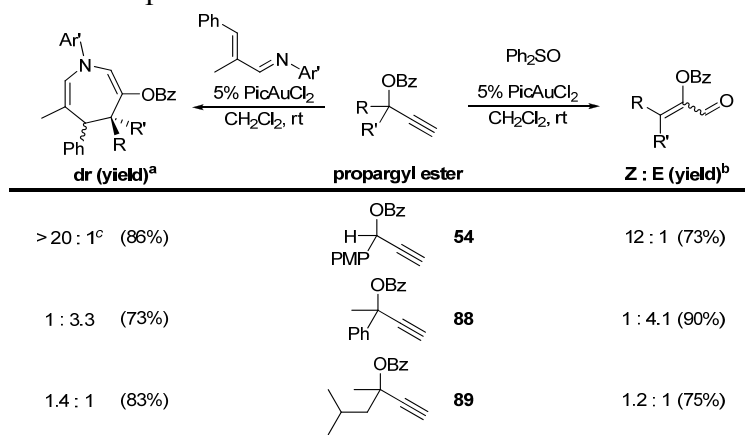

<sup>a</sup>. Conditions: 1.3 equiv. propargyl ester, 5% **4**, CH<sub>2</sub>Cl<sub>2</sub>, rt. <sup>b</sup>. Conditions: 2 equiv. Ph<sub>2</sub>SO, 5% **4**, CH<sub>2</sub>Cl<sub>2</sub>, rt. <sup>c</sup>. Only the *trans* diastereomer was observed. Ar' = 4-HO-2,6-Me<sub>2</sub>-C<sub>6</sub>H<sub>2</sub>

## Hammett Plots

A solution of 3 equiv. R=H imine, 3 equiv. R = X imine, 1 equiv. of propargyl ester, and 0.3 equiv. internal standard (1,3,5-trinitrobenzene) were dissolved in d<sub>2</sub>-DCM (0.1 M in propargyl ester). An initial <sup>1</sup>H-NMR spectrum was acquired followed by addition of 0.1 equiv. PicAuCl<sub>2</sub>. The reaction was monitored periodically by NMR. Upon completion, relative rates were obtained from NMR integrations of the products in the crude reaction mixture.

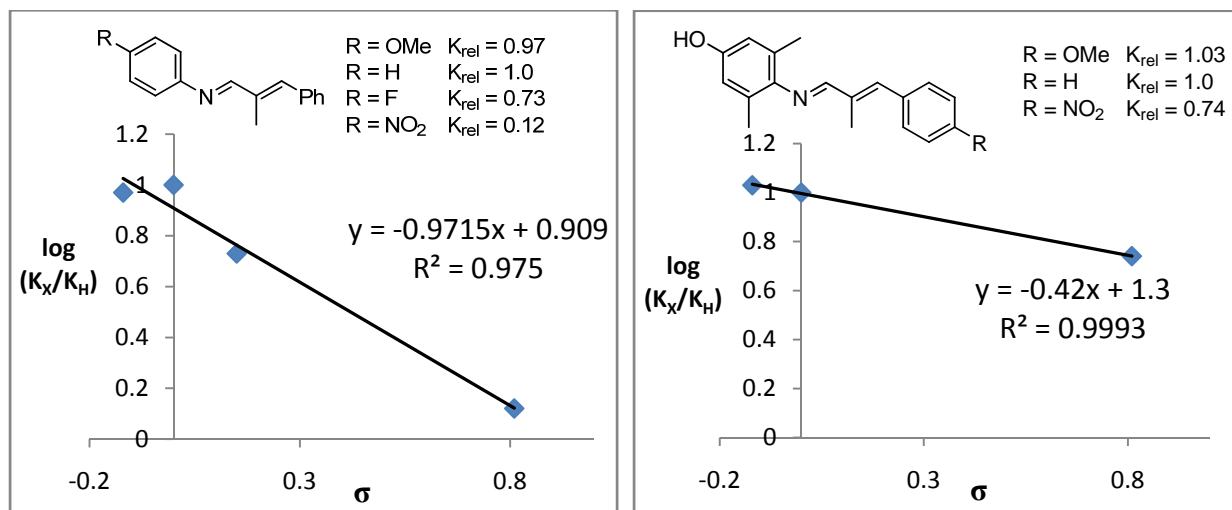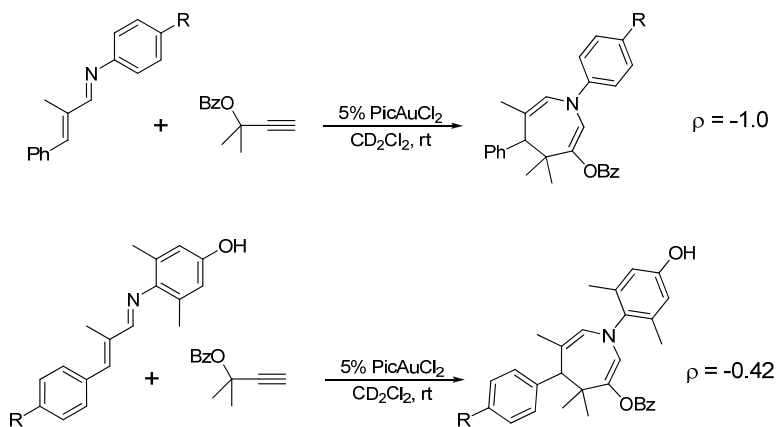

Supplement: NIHMS110691-supplement-experimental_data.pdf [file NIHMS110691-supplement-experimental_data.pdf]
