# Supplementary material
Source: PubMed Central journal article supplement (PMC2754784)
Supplement: NIHMS110691-supplement-nmr_data.pdf [file NIHMS110691-supplement-nmr_data.pdf]

# **Synthesis of Azepines by a Gold-Catalyzed Intermolecular [4+3]-Annulation**

Nathan D. Shapiro and F. Dean Toste\*

*Department of Chemistry, University of California, Berkeley, California 94720*

## **NMR spectra**

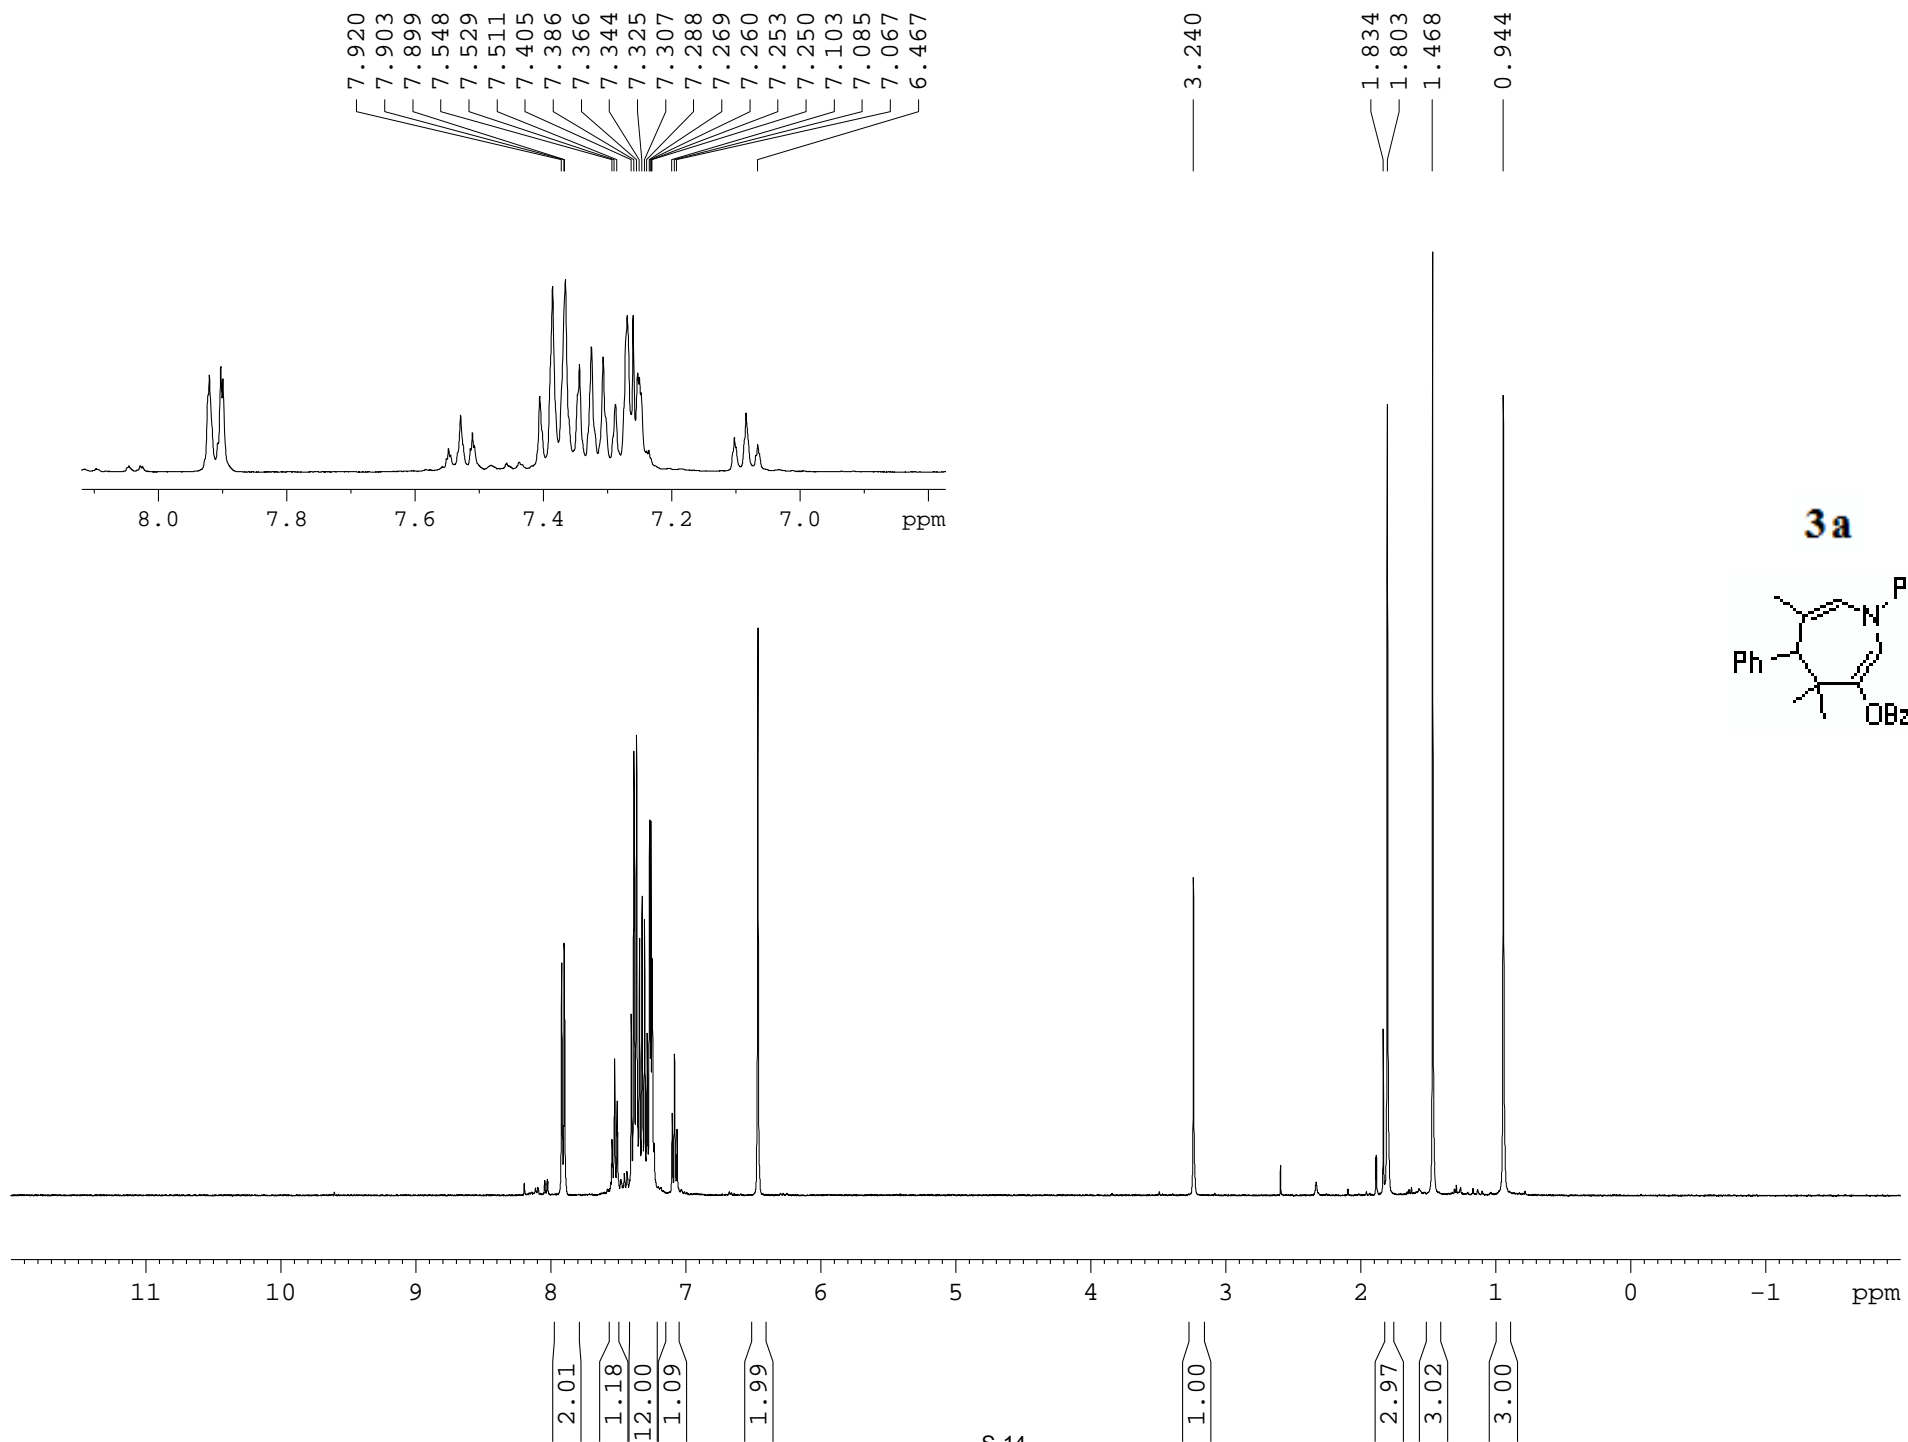

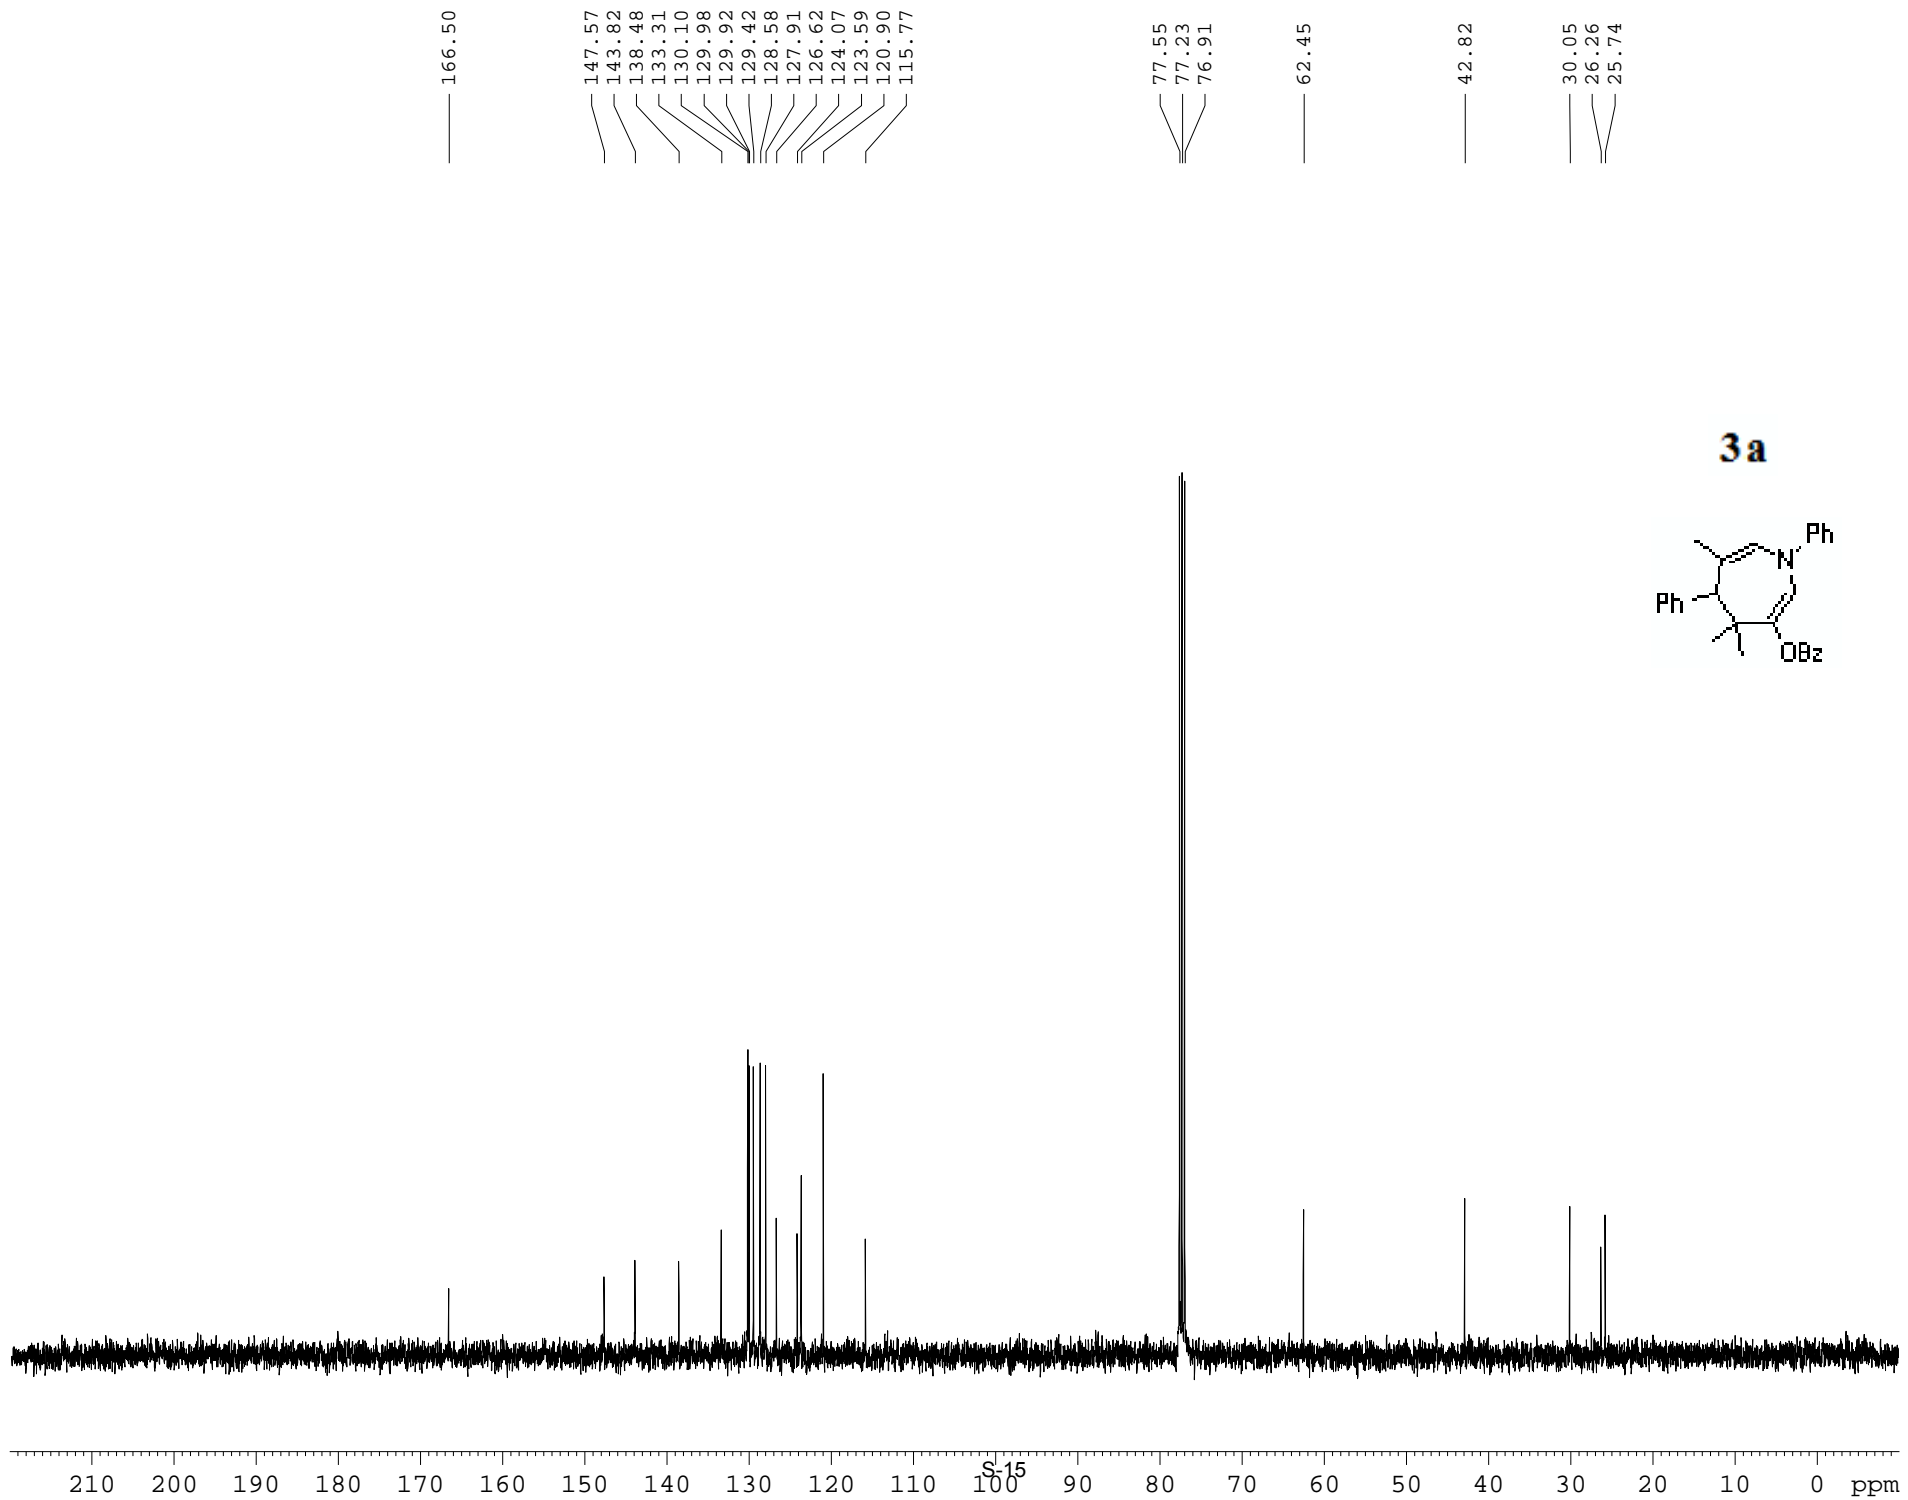

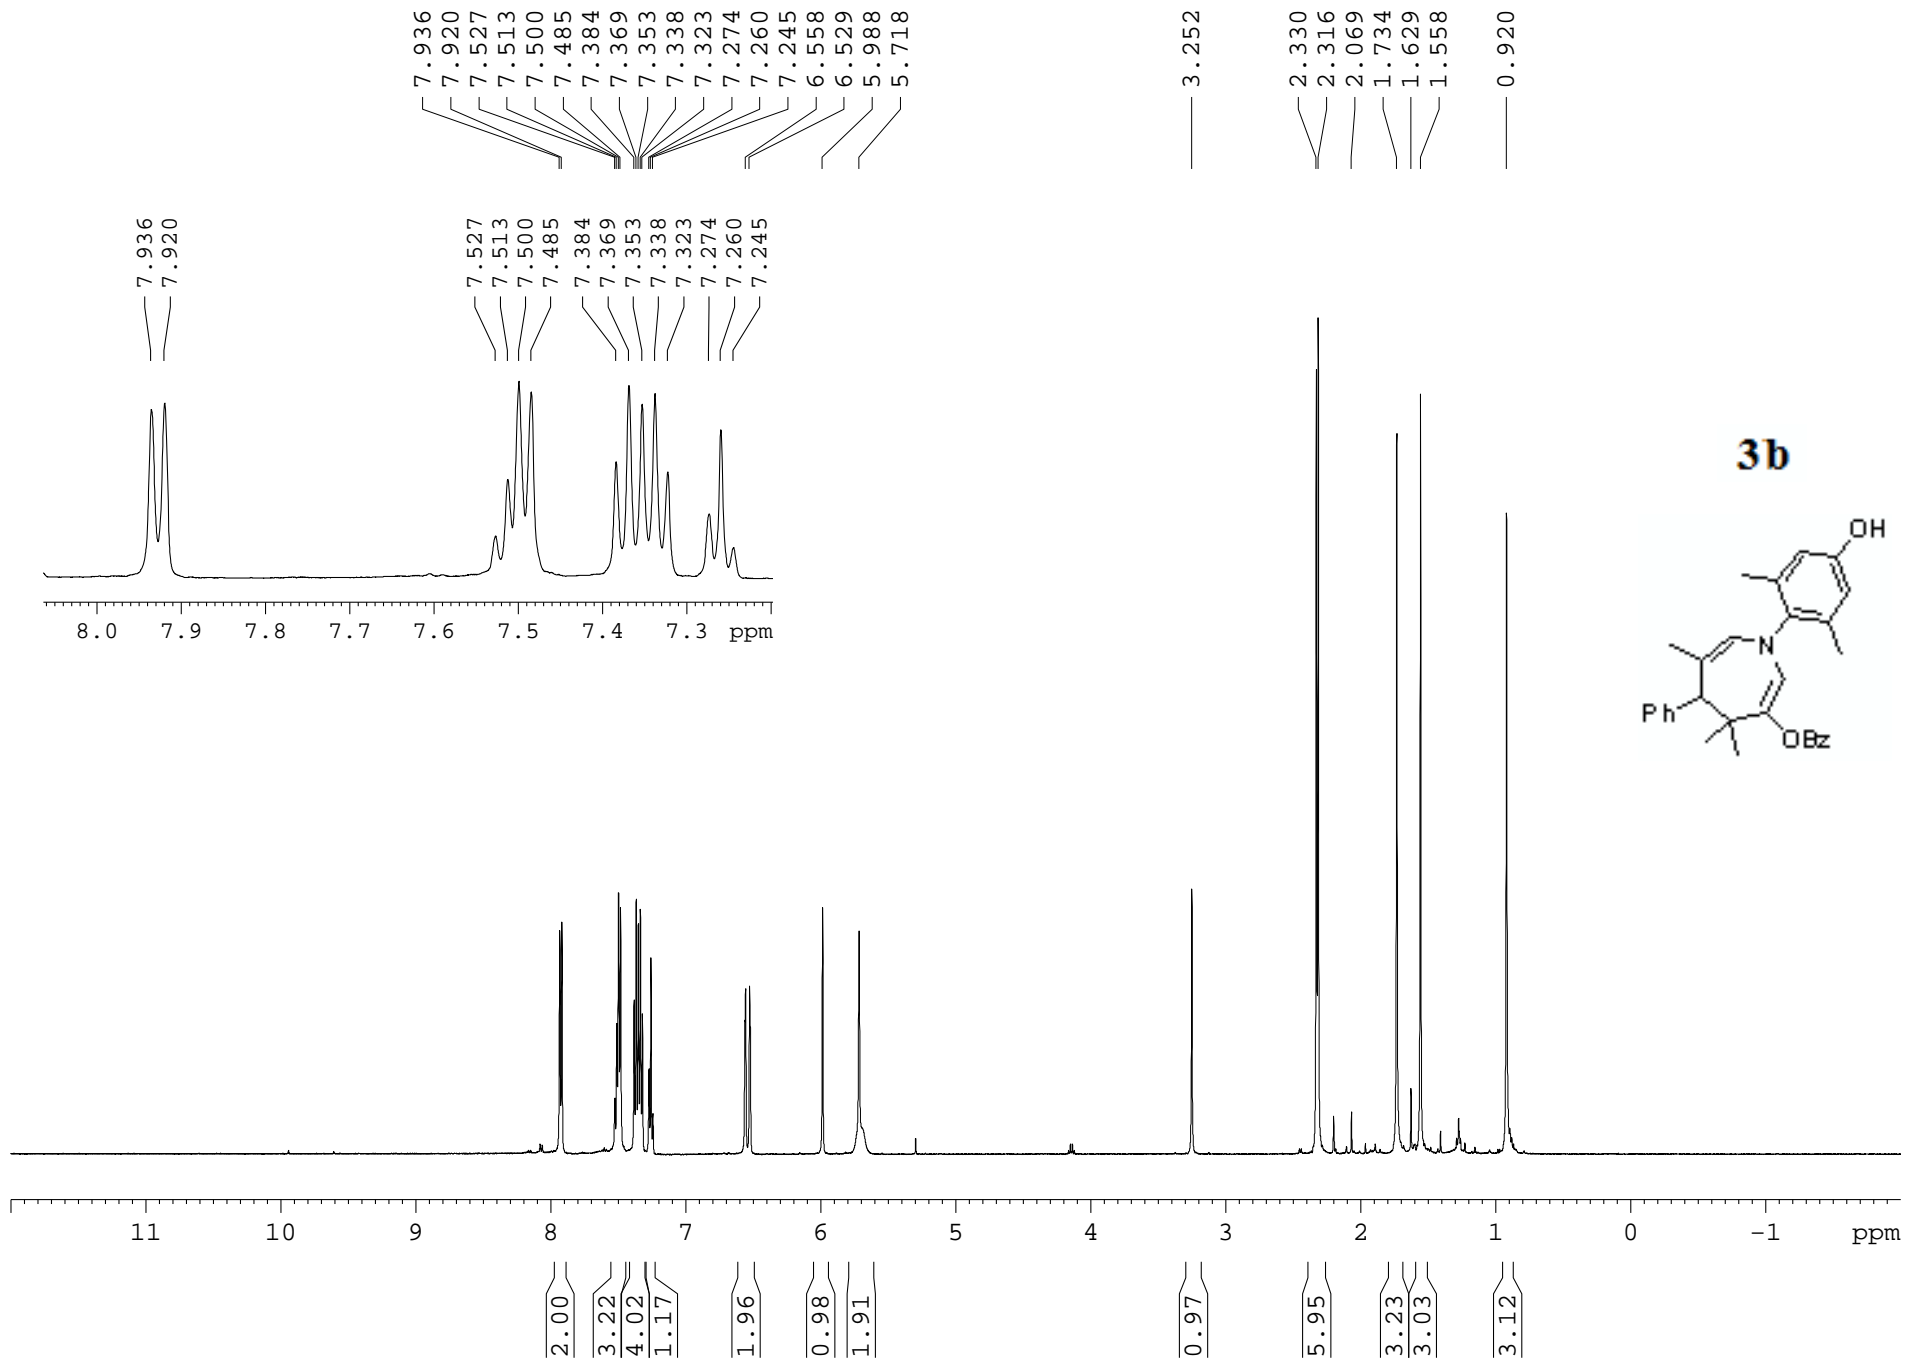

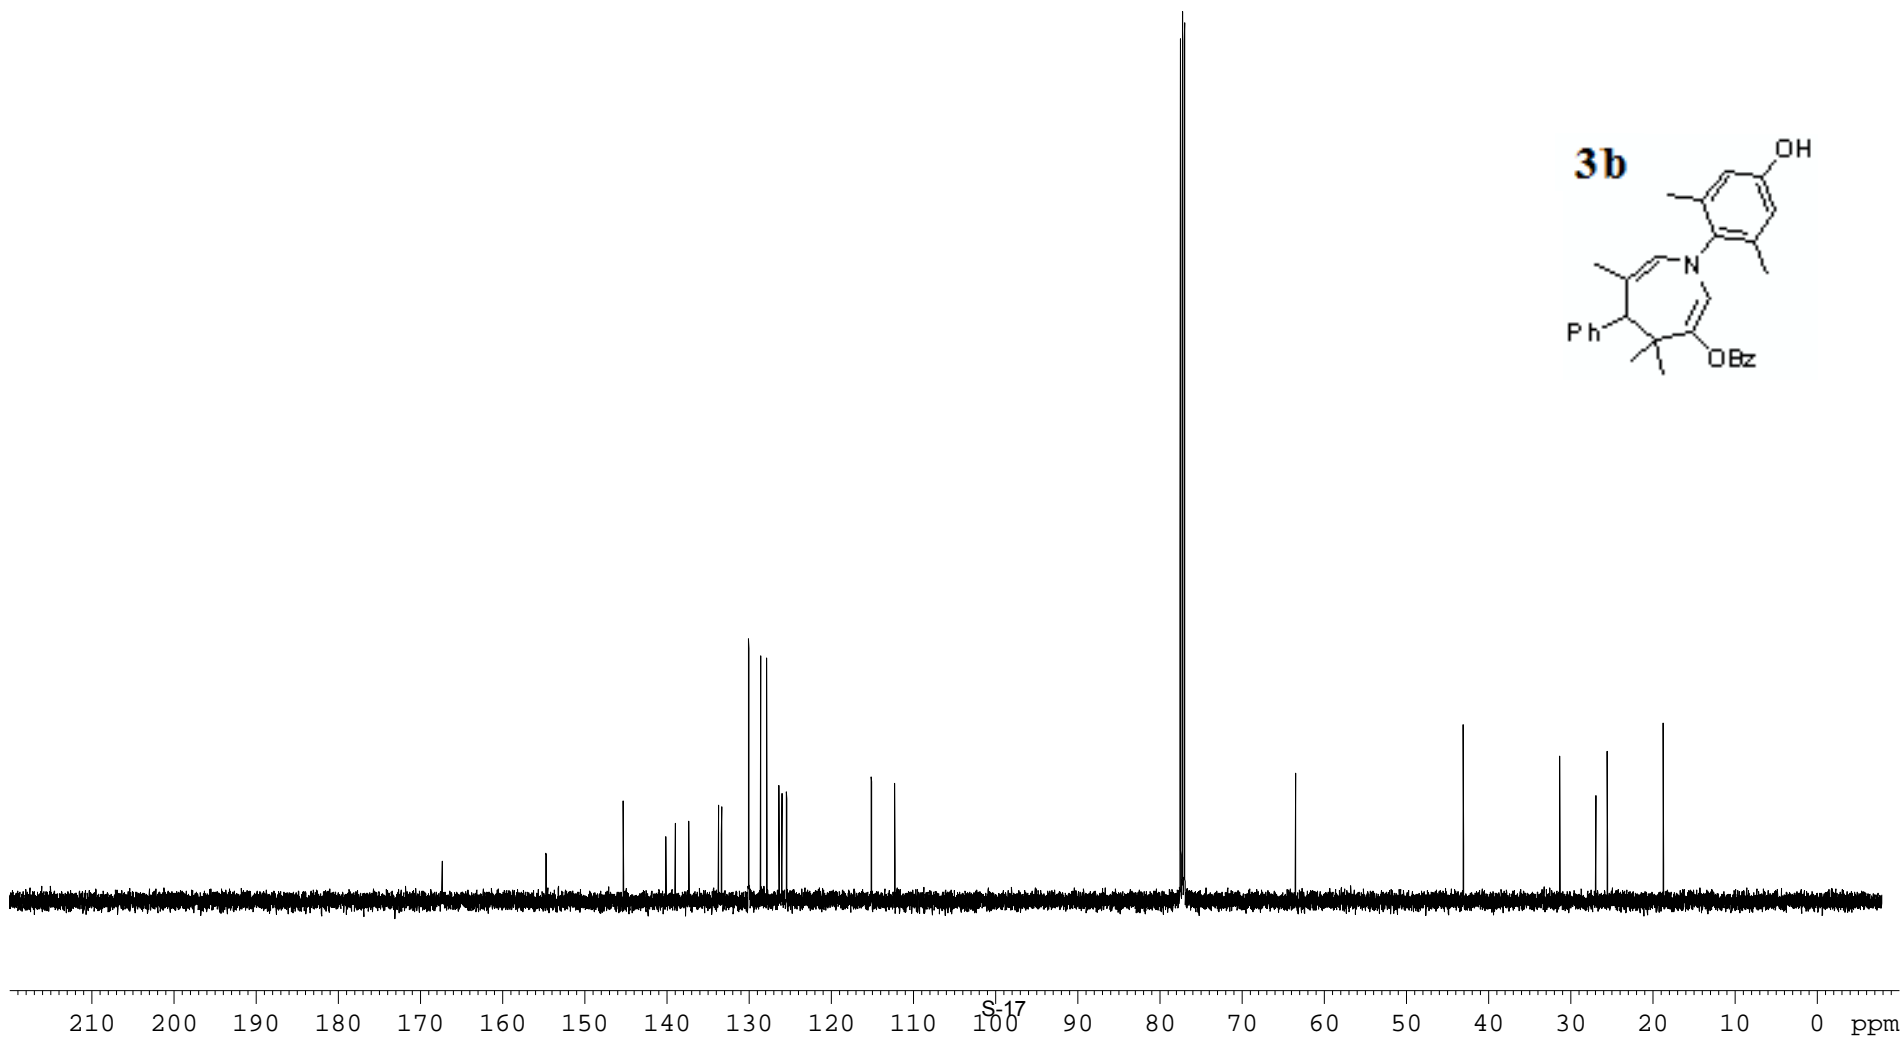

**3c**

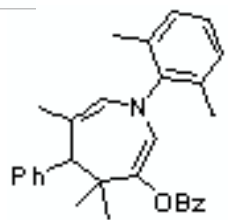

7.917  
7.899  
7.504  
7.497  
7.486  
7.375  
7.356  
7.333  
7.313  
7.271  
7.260  
7.254  
7.100  
5.980  
5.977  
5.744

3.252

2.465  
2.395

1.739  
1.562  
1.550

0.911

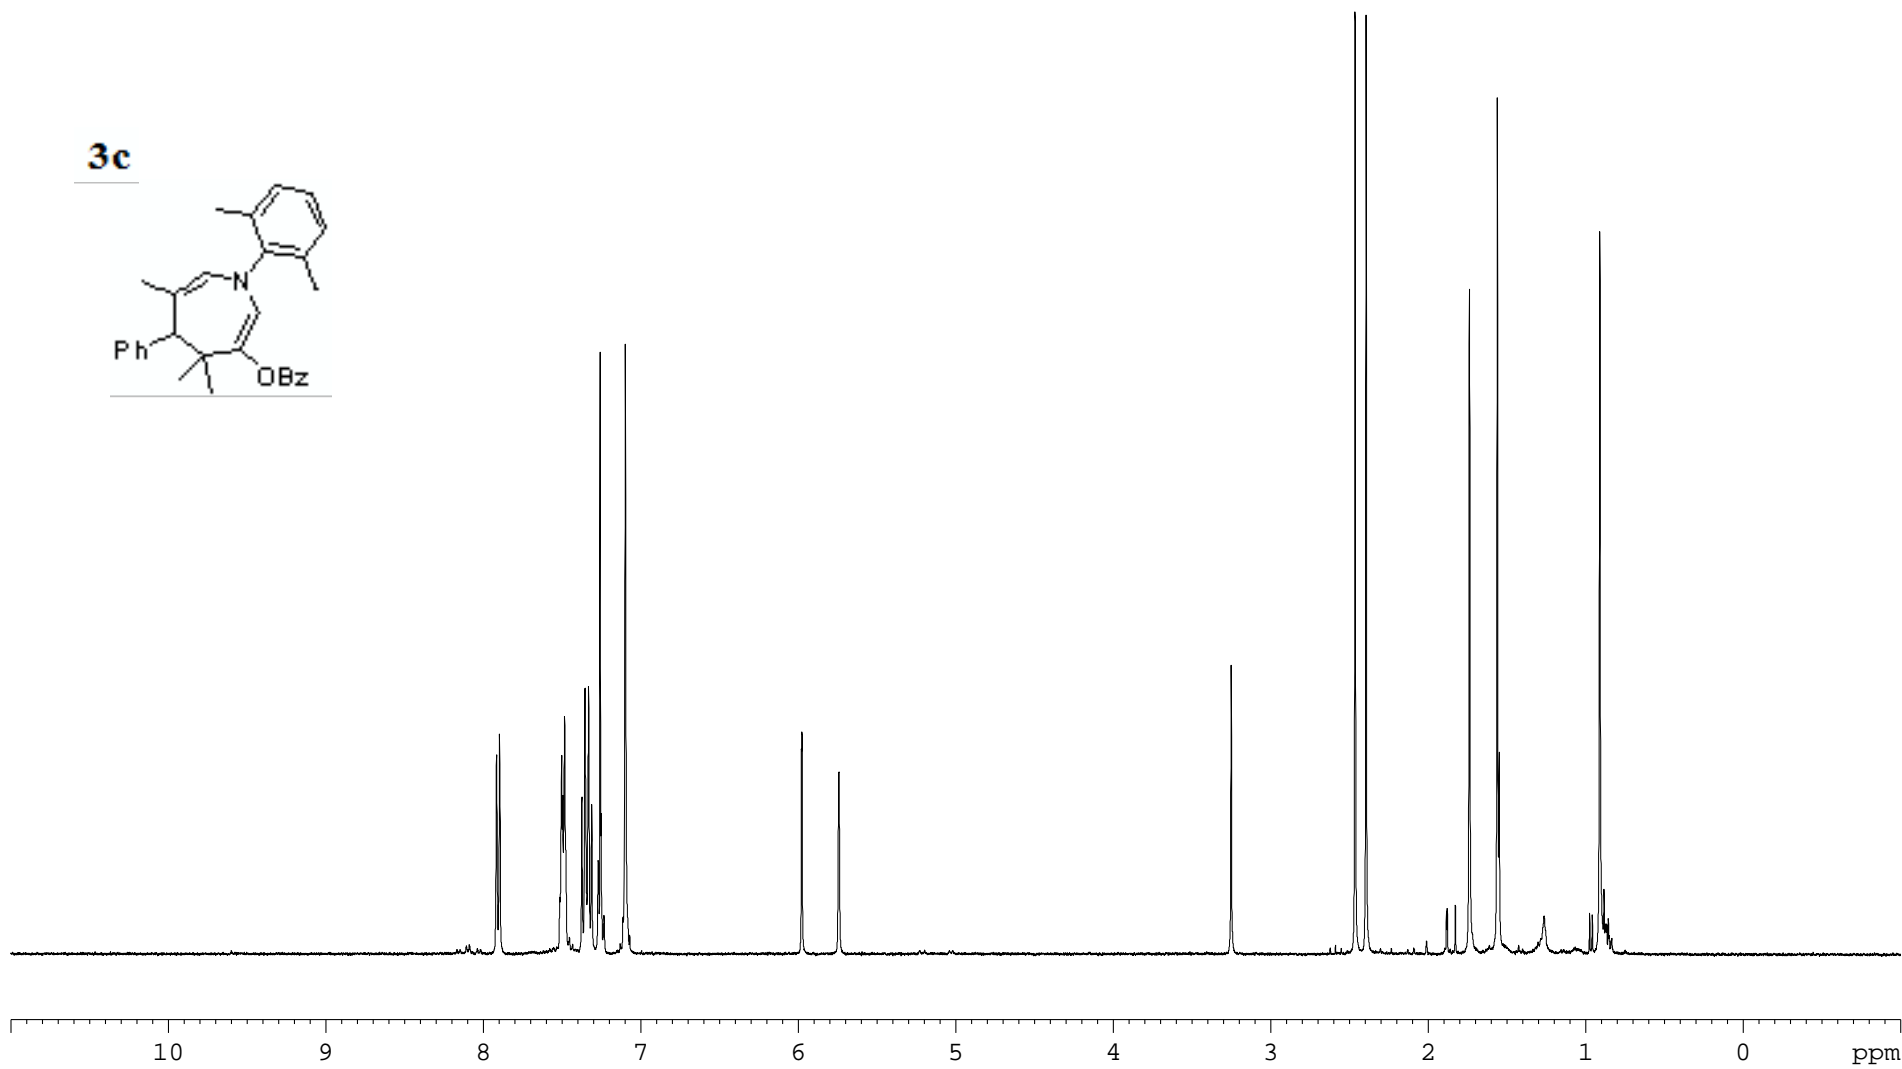

2.01

3.11

4.02

2.35

2.99

1.00

1.00

0.99

2.93

2.95

3.10

3.00

3.03

166.93  
162.60  
146.80  
145.39  
137.66  
135.98  
133.99  
133.23  
130.28  
130.15  
130.11  
129.03  
128.98  
128.59  
127.94  
127.68  
126.45  
125.51  
124.89  
112.45

77.77  
77.35  
76.93

63.63

43.18

31.35  
27.02  
25.62

18.78  
14.52

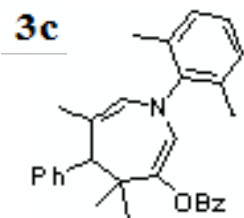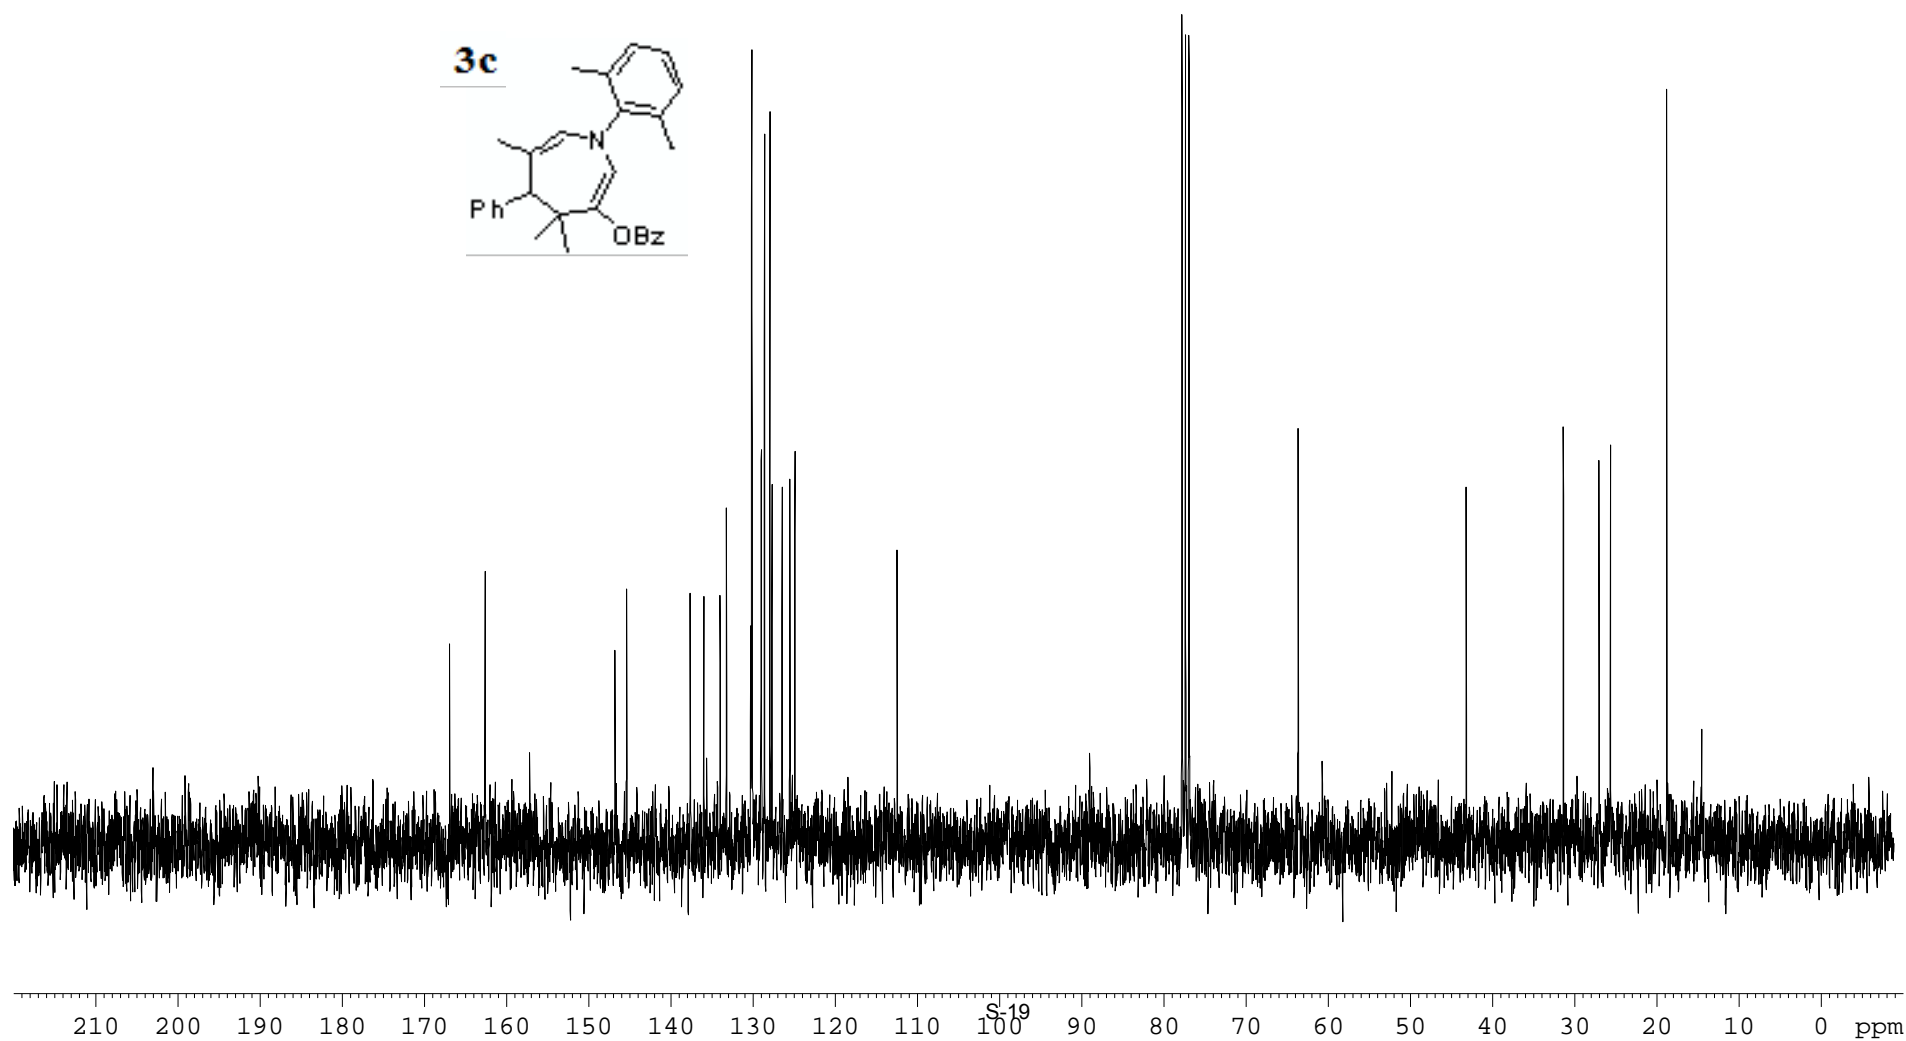

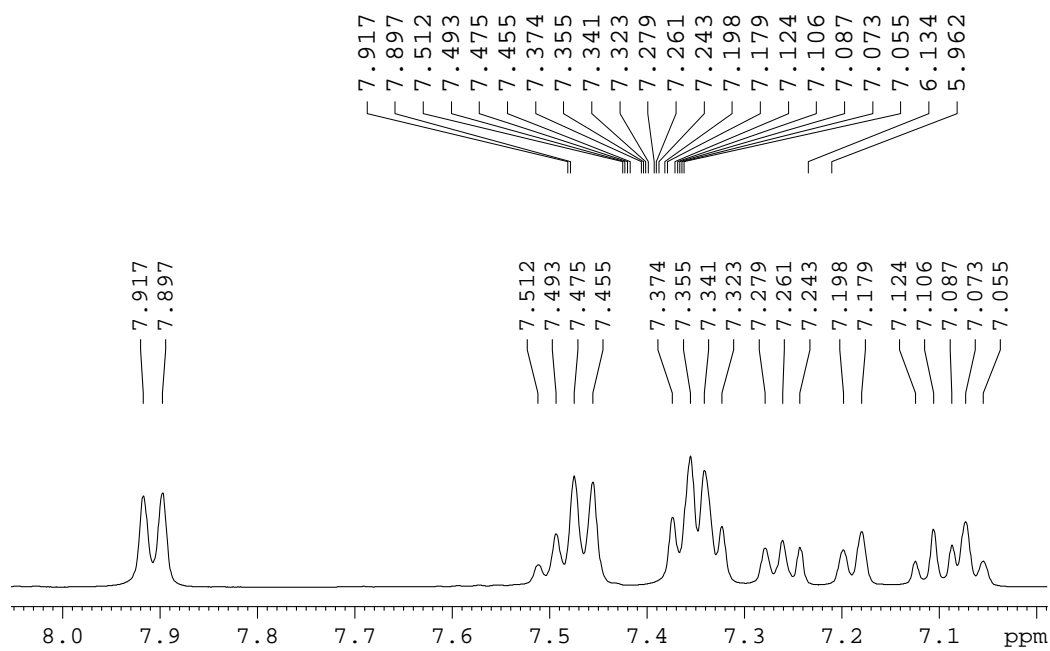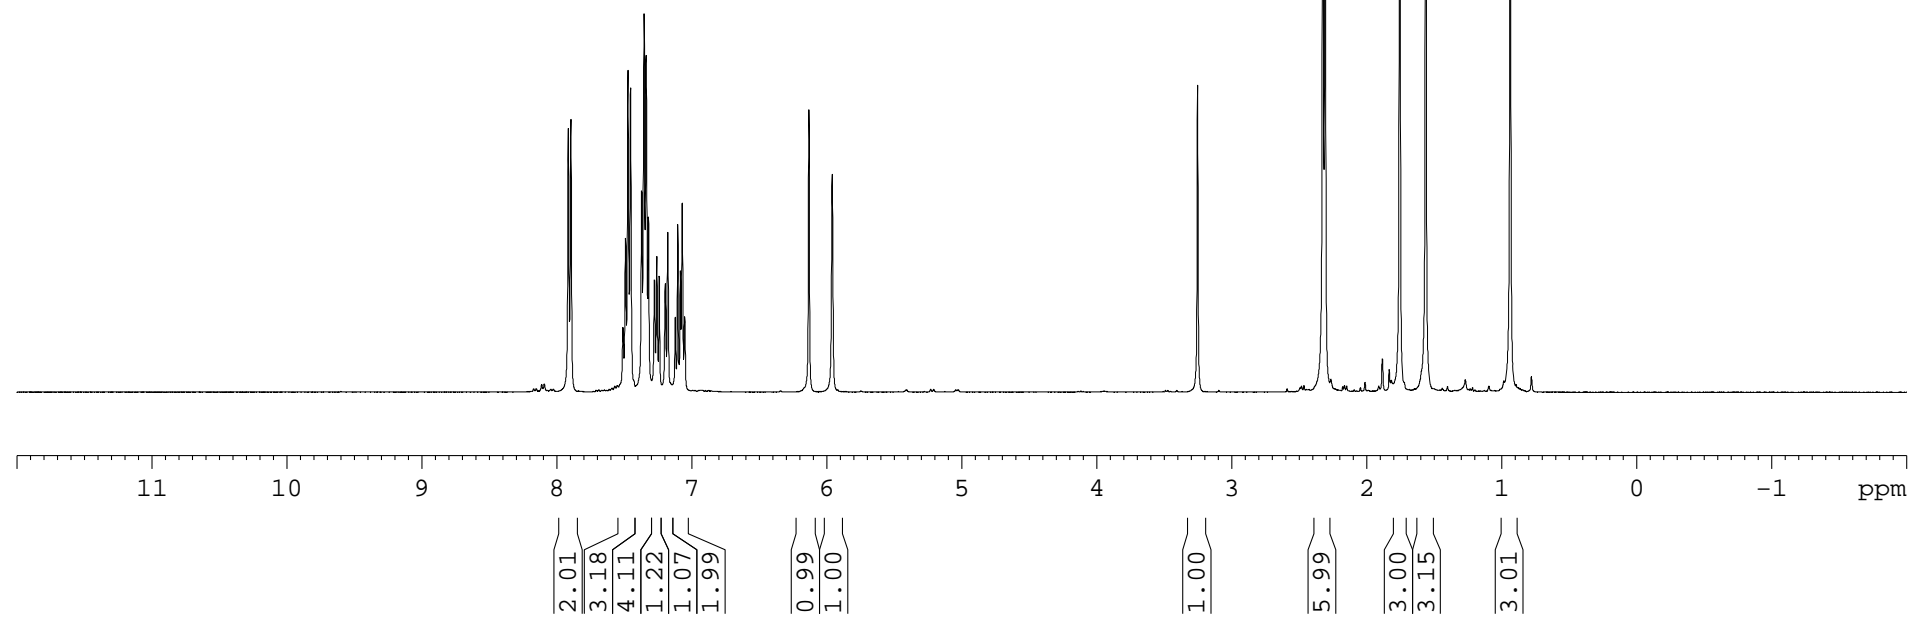

3.254

2.327  
2.310

1.756  
1.564

0.938

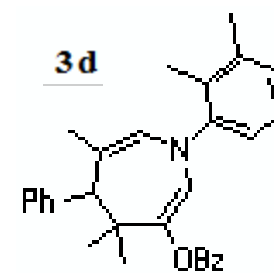



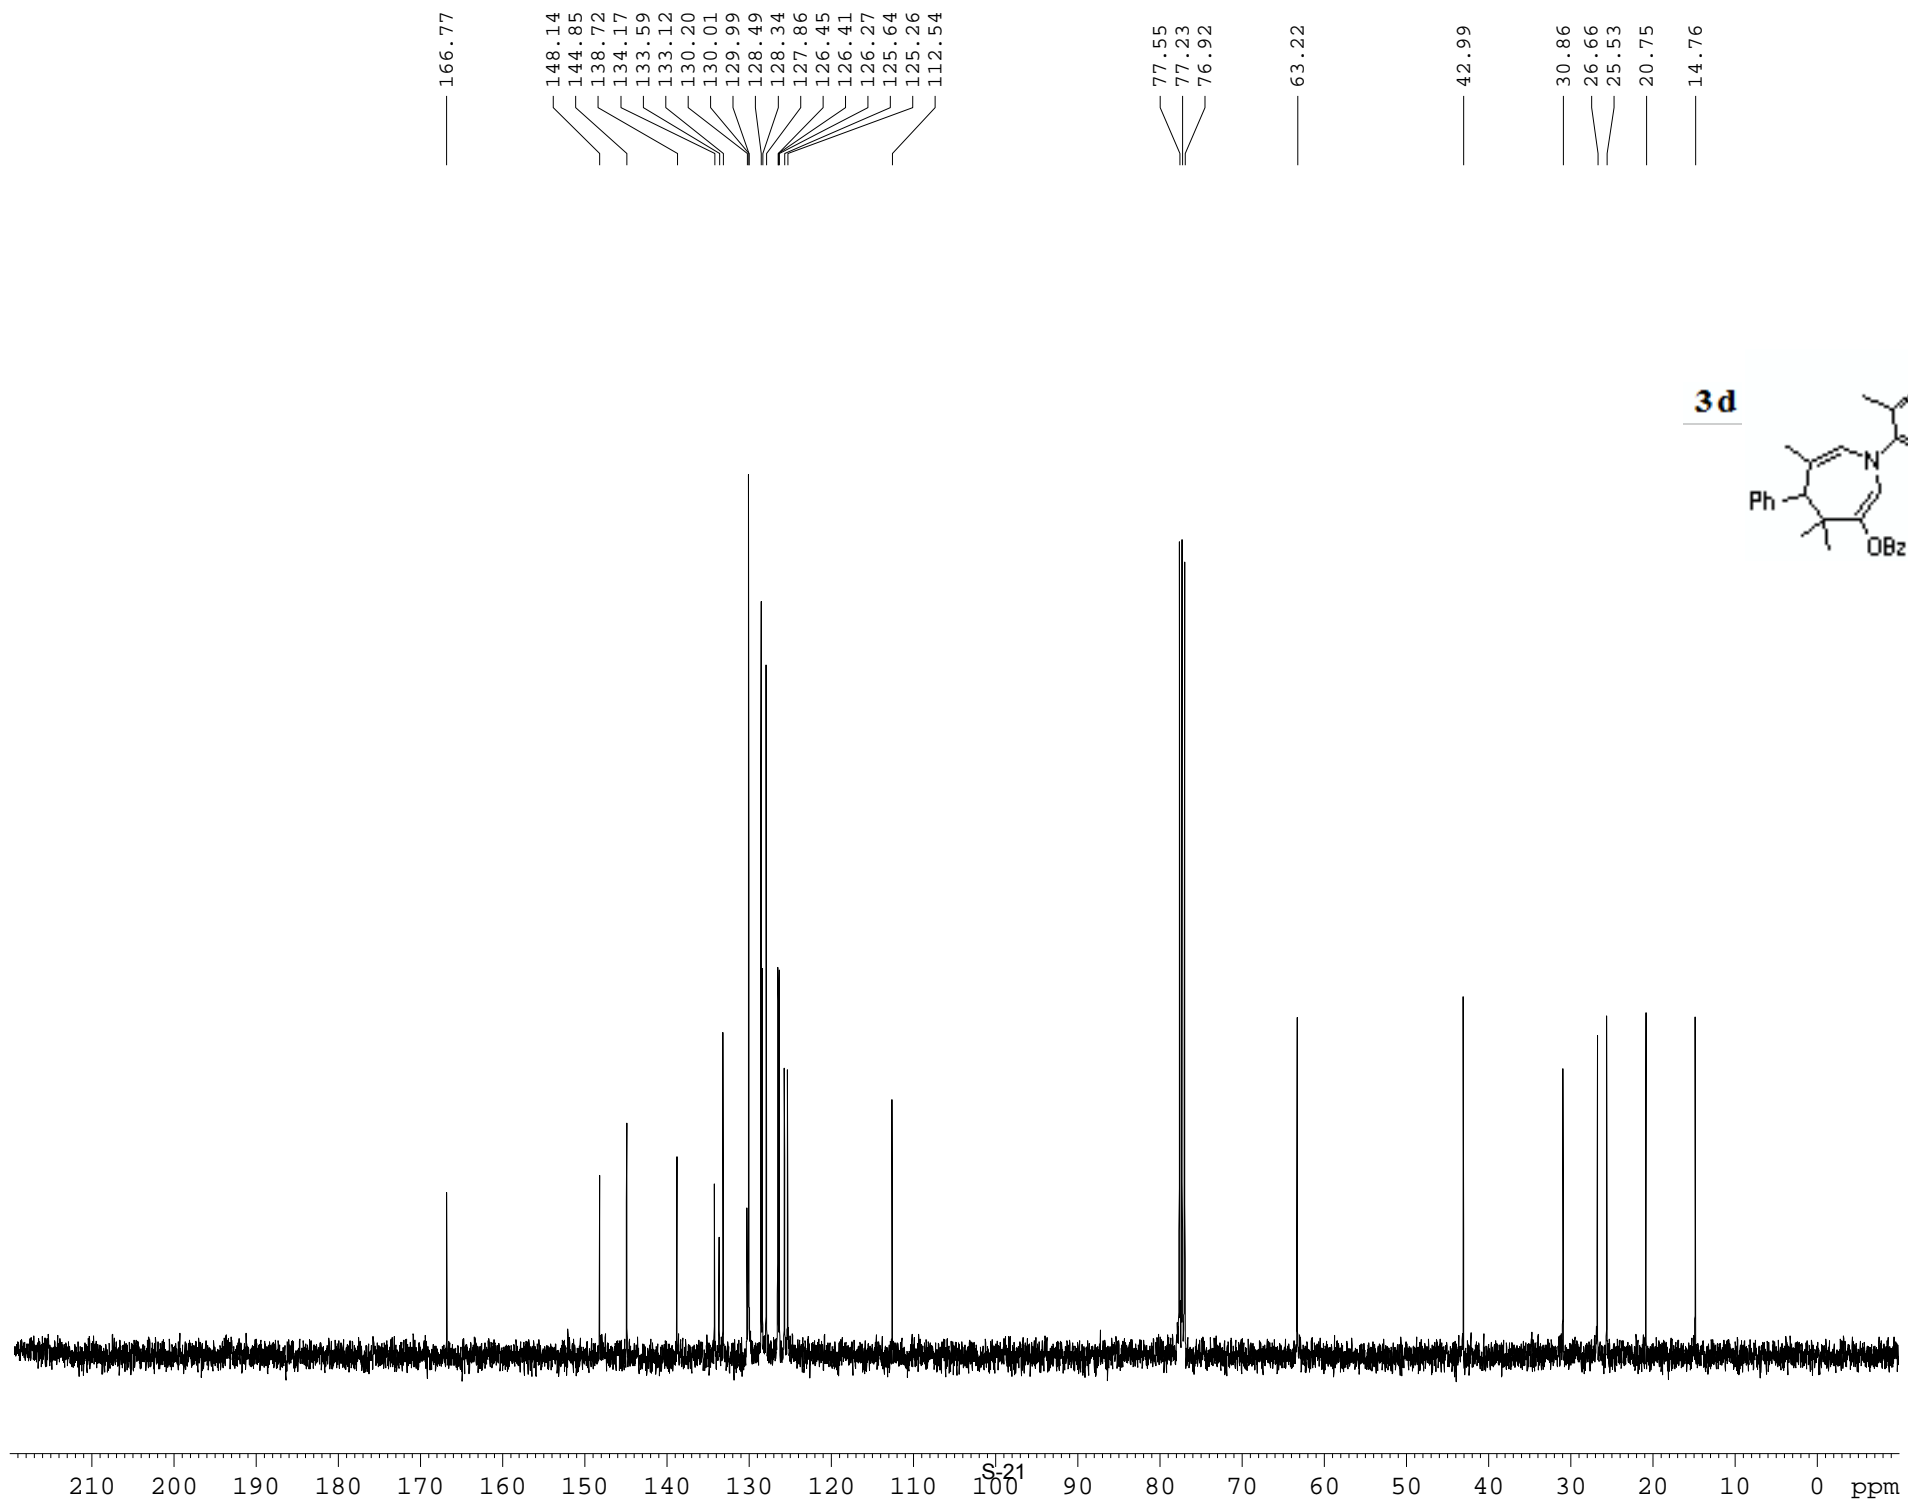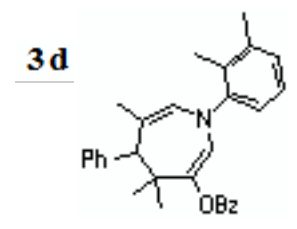

7.921  
7.903  
7.538  
7.520  
7.502  
7.388  
7.378  
7.325  
7.307  
7.289  
7.260  
7.248  
7.216  
7.194  
6.888  
6.866  
6.375  
6.329

3.802  
3.230  
1.791  
1.472  
0.935

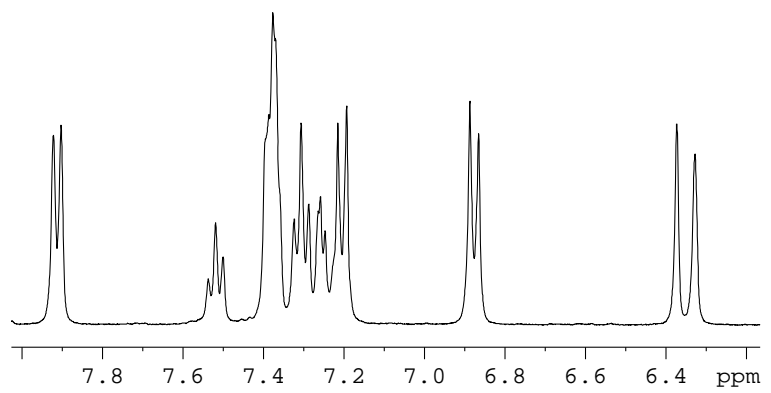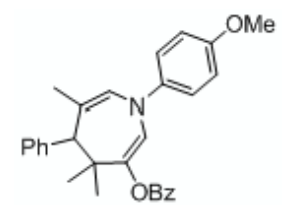

**3e**

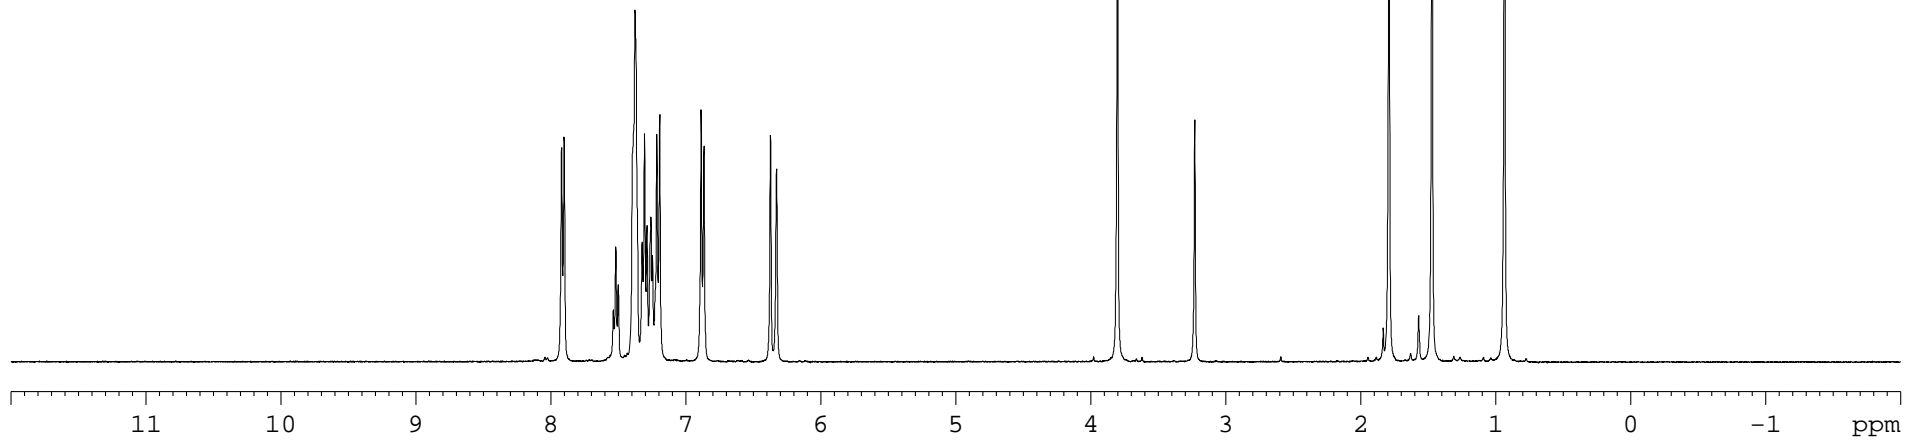

1.97  
1.09  
3.94  
2.04  
1.17  
2.02  
2.01  
1.97  
3.02  
1.00  
3.07  
2.98  
2.96

166.63  
156.43  
144.20  
141.78  
136.83  
133.24  
130.06  
129.89  
128.54  
127.87  
126.52  
124.98  
124.13  
123.20  
114.62  
114.53

77.48  
77.23  
76.98

62.71

55.78

42.88

30.45  
26.40  
25.72

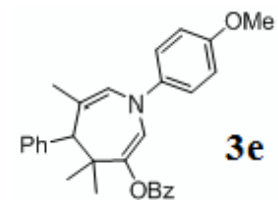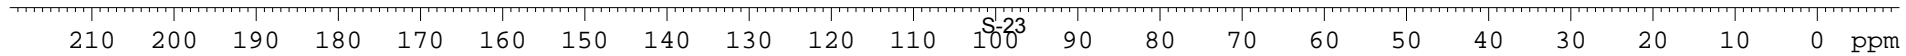

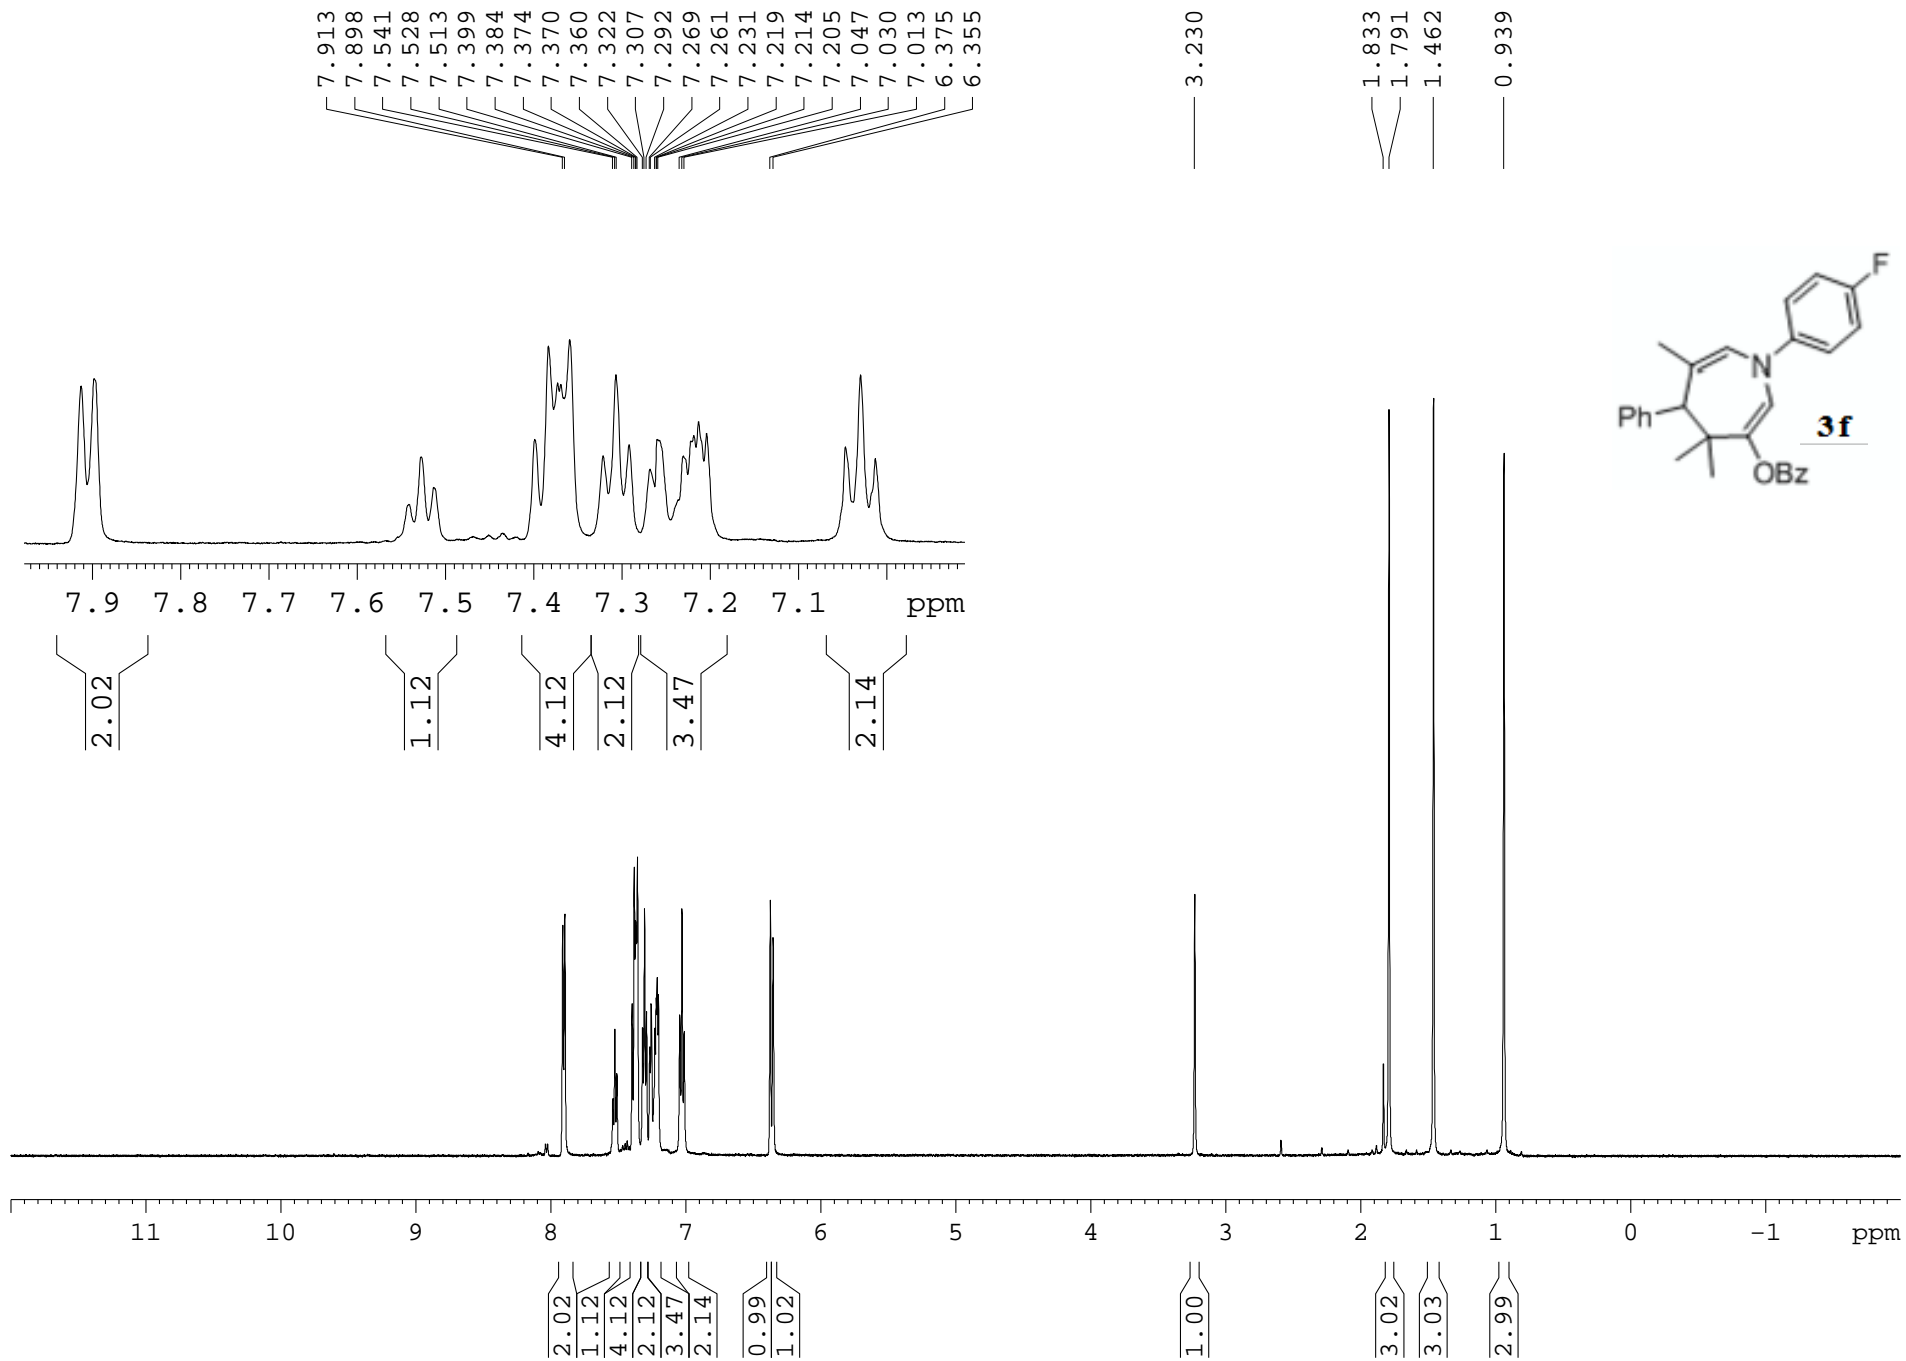

166.51  
160.41  
158.48  
144.12  
144.09  
143.83  
138.11  
133.34  
130.08  
129.93  
129.88  
128.59  
127.93  
126.64  
124.36  
123.74  
122.90  
122.84  
116.12  
115.94  
115.64

77.48  
77.23  
76.97

62.48

42.85

30.17  
26.29  
25.67

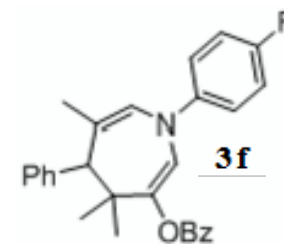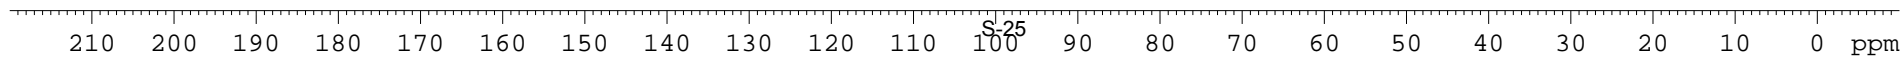

8.213  
8.191  
7.928  
7.910  
7.908  
7.679  
7.657  
7.545  
7.526  
7.508  
7.400  
7.381  
7.362  
7.260  
6.568  
6.550  
6.017  
6.014  
5.772

3.401  
2.322  
2.299  
2.064  
1.724  
1.575  
1.270  
0.922

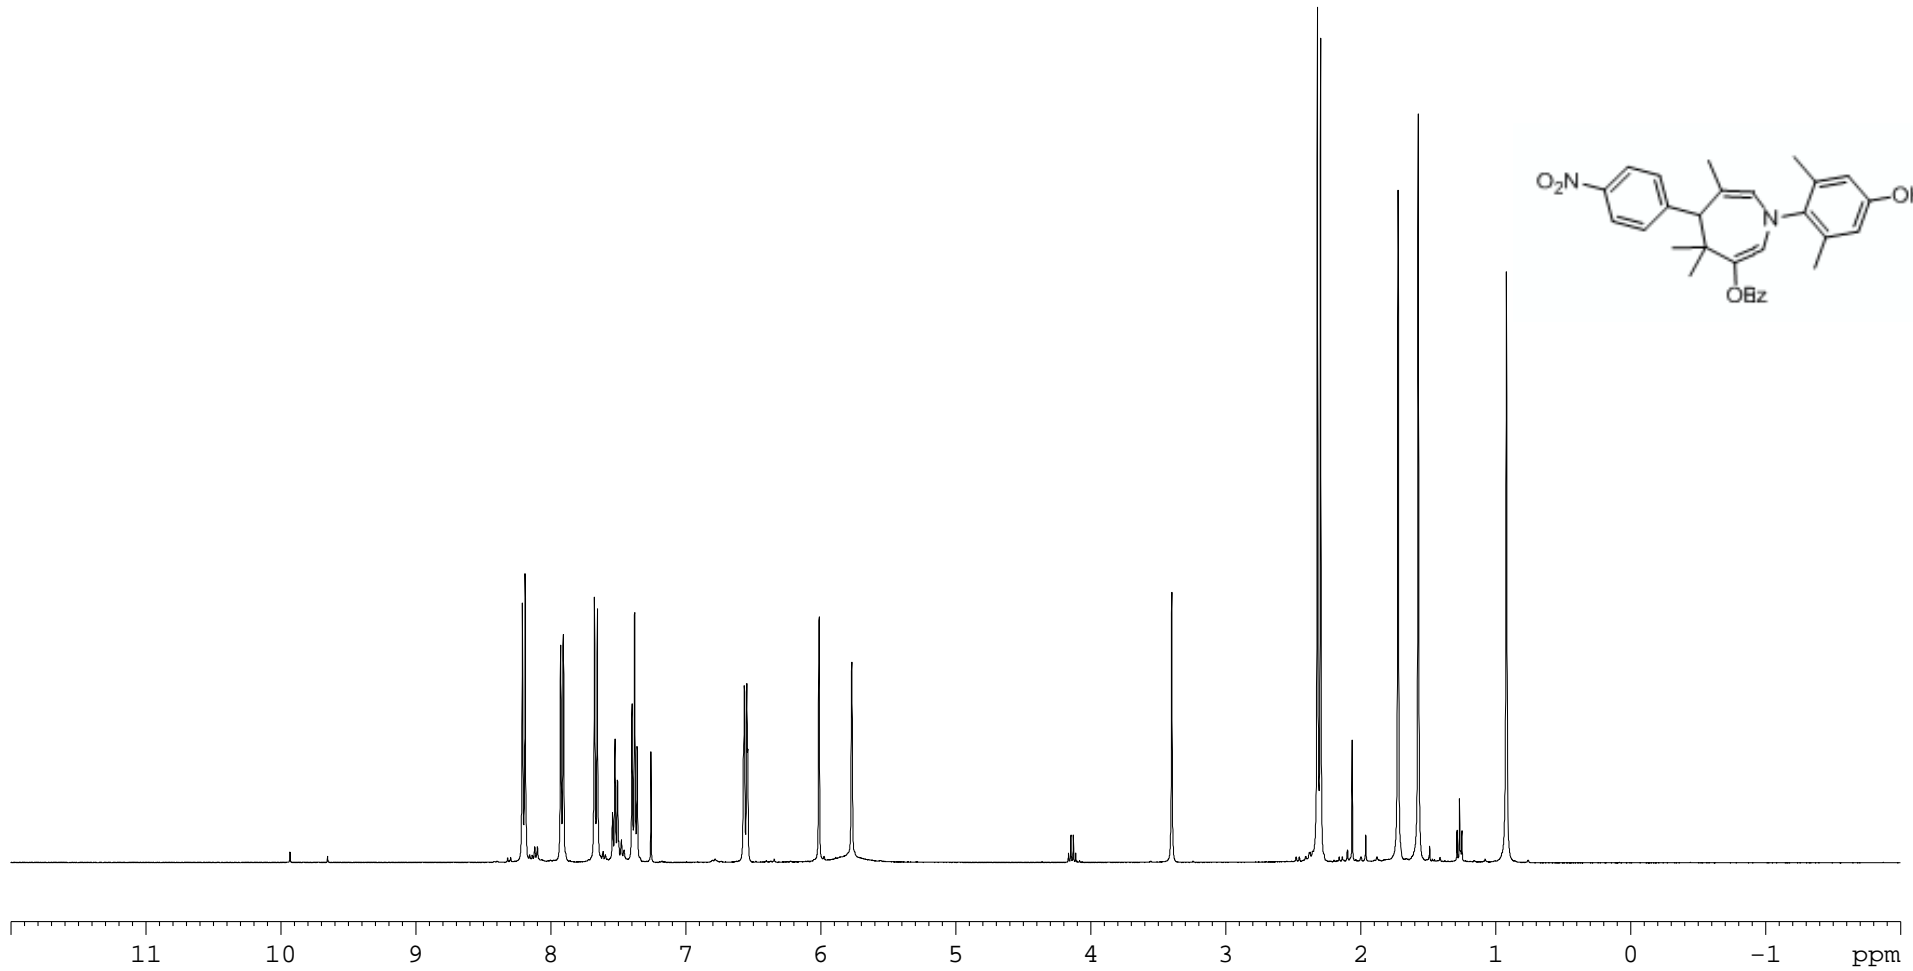

2.09  
2.06  
2.12  
1.19  
2.09

2.00  
1.07  
1.27

1.04

6.10  
3.15  
3.18

3.06

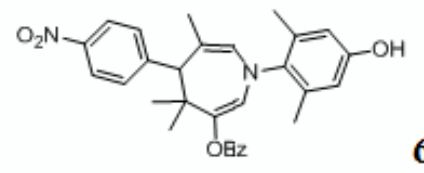

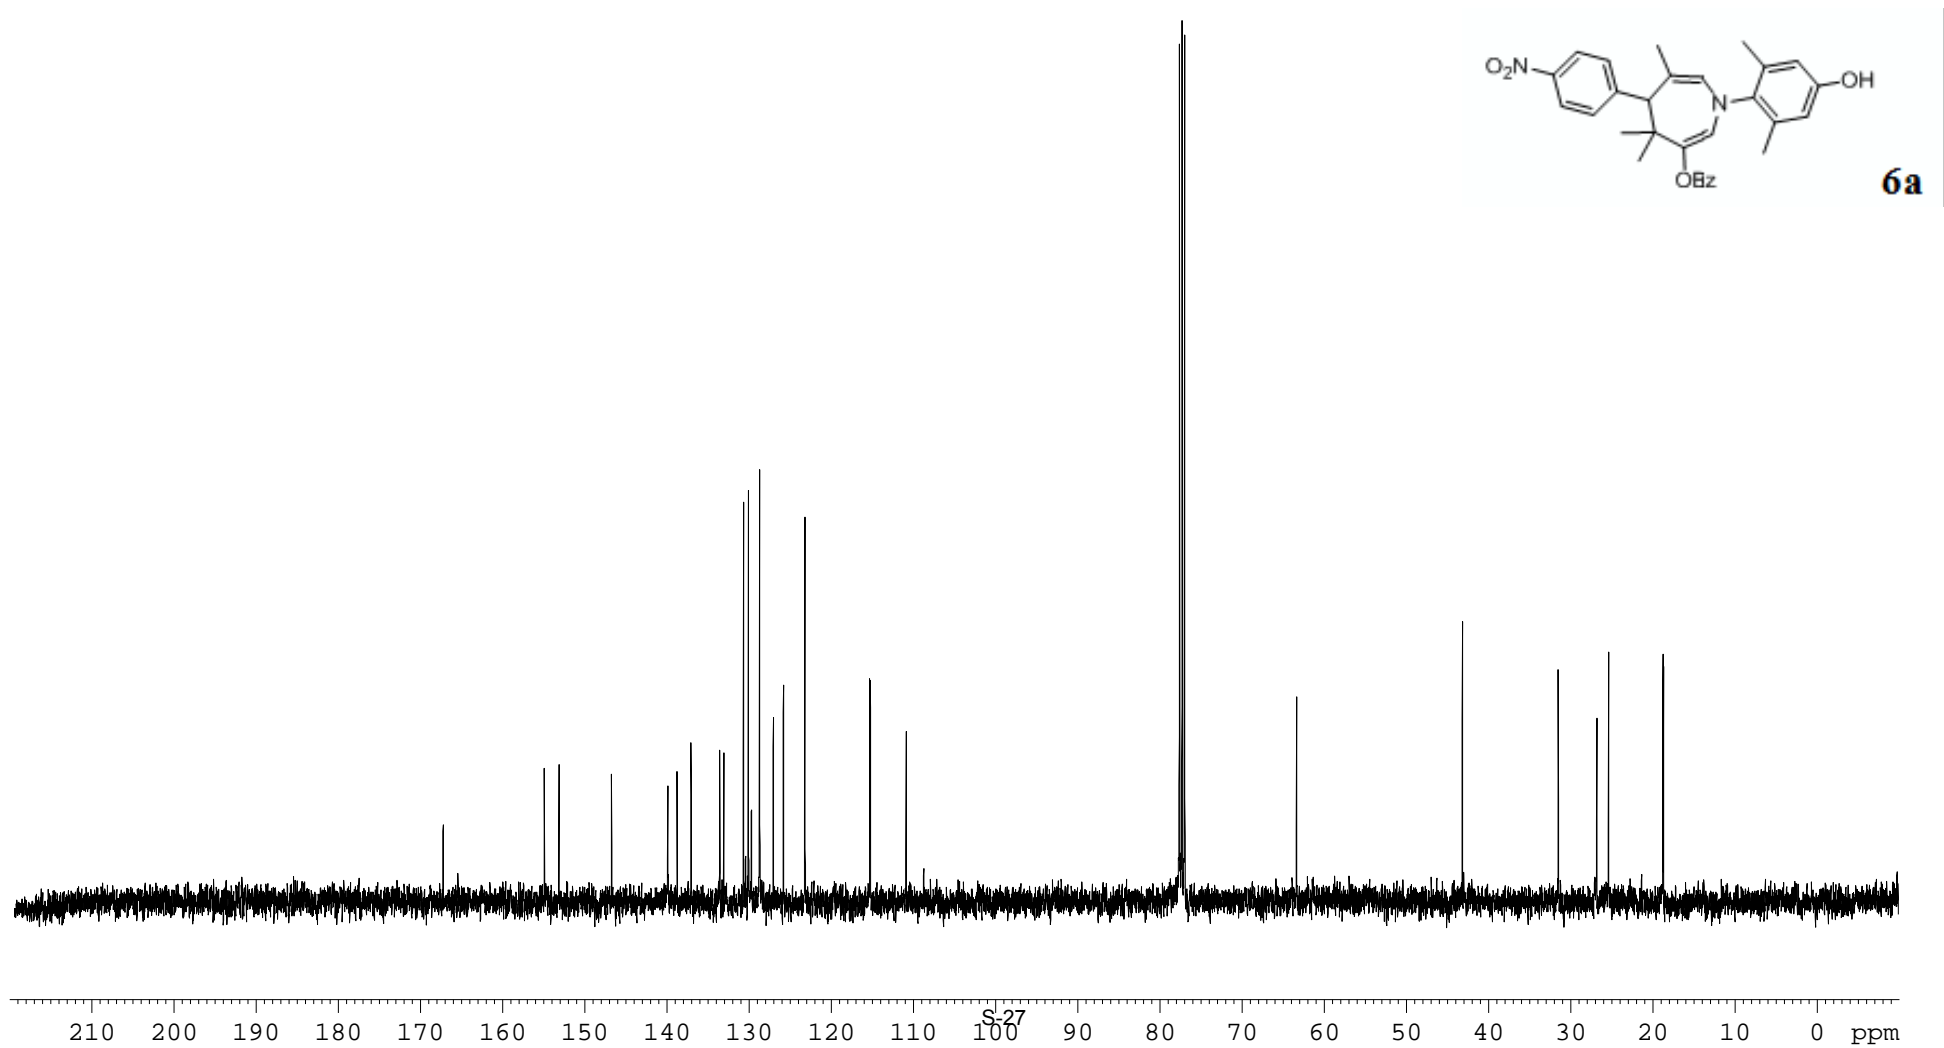

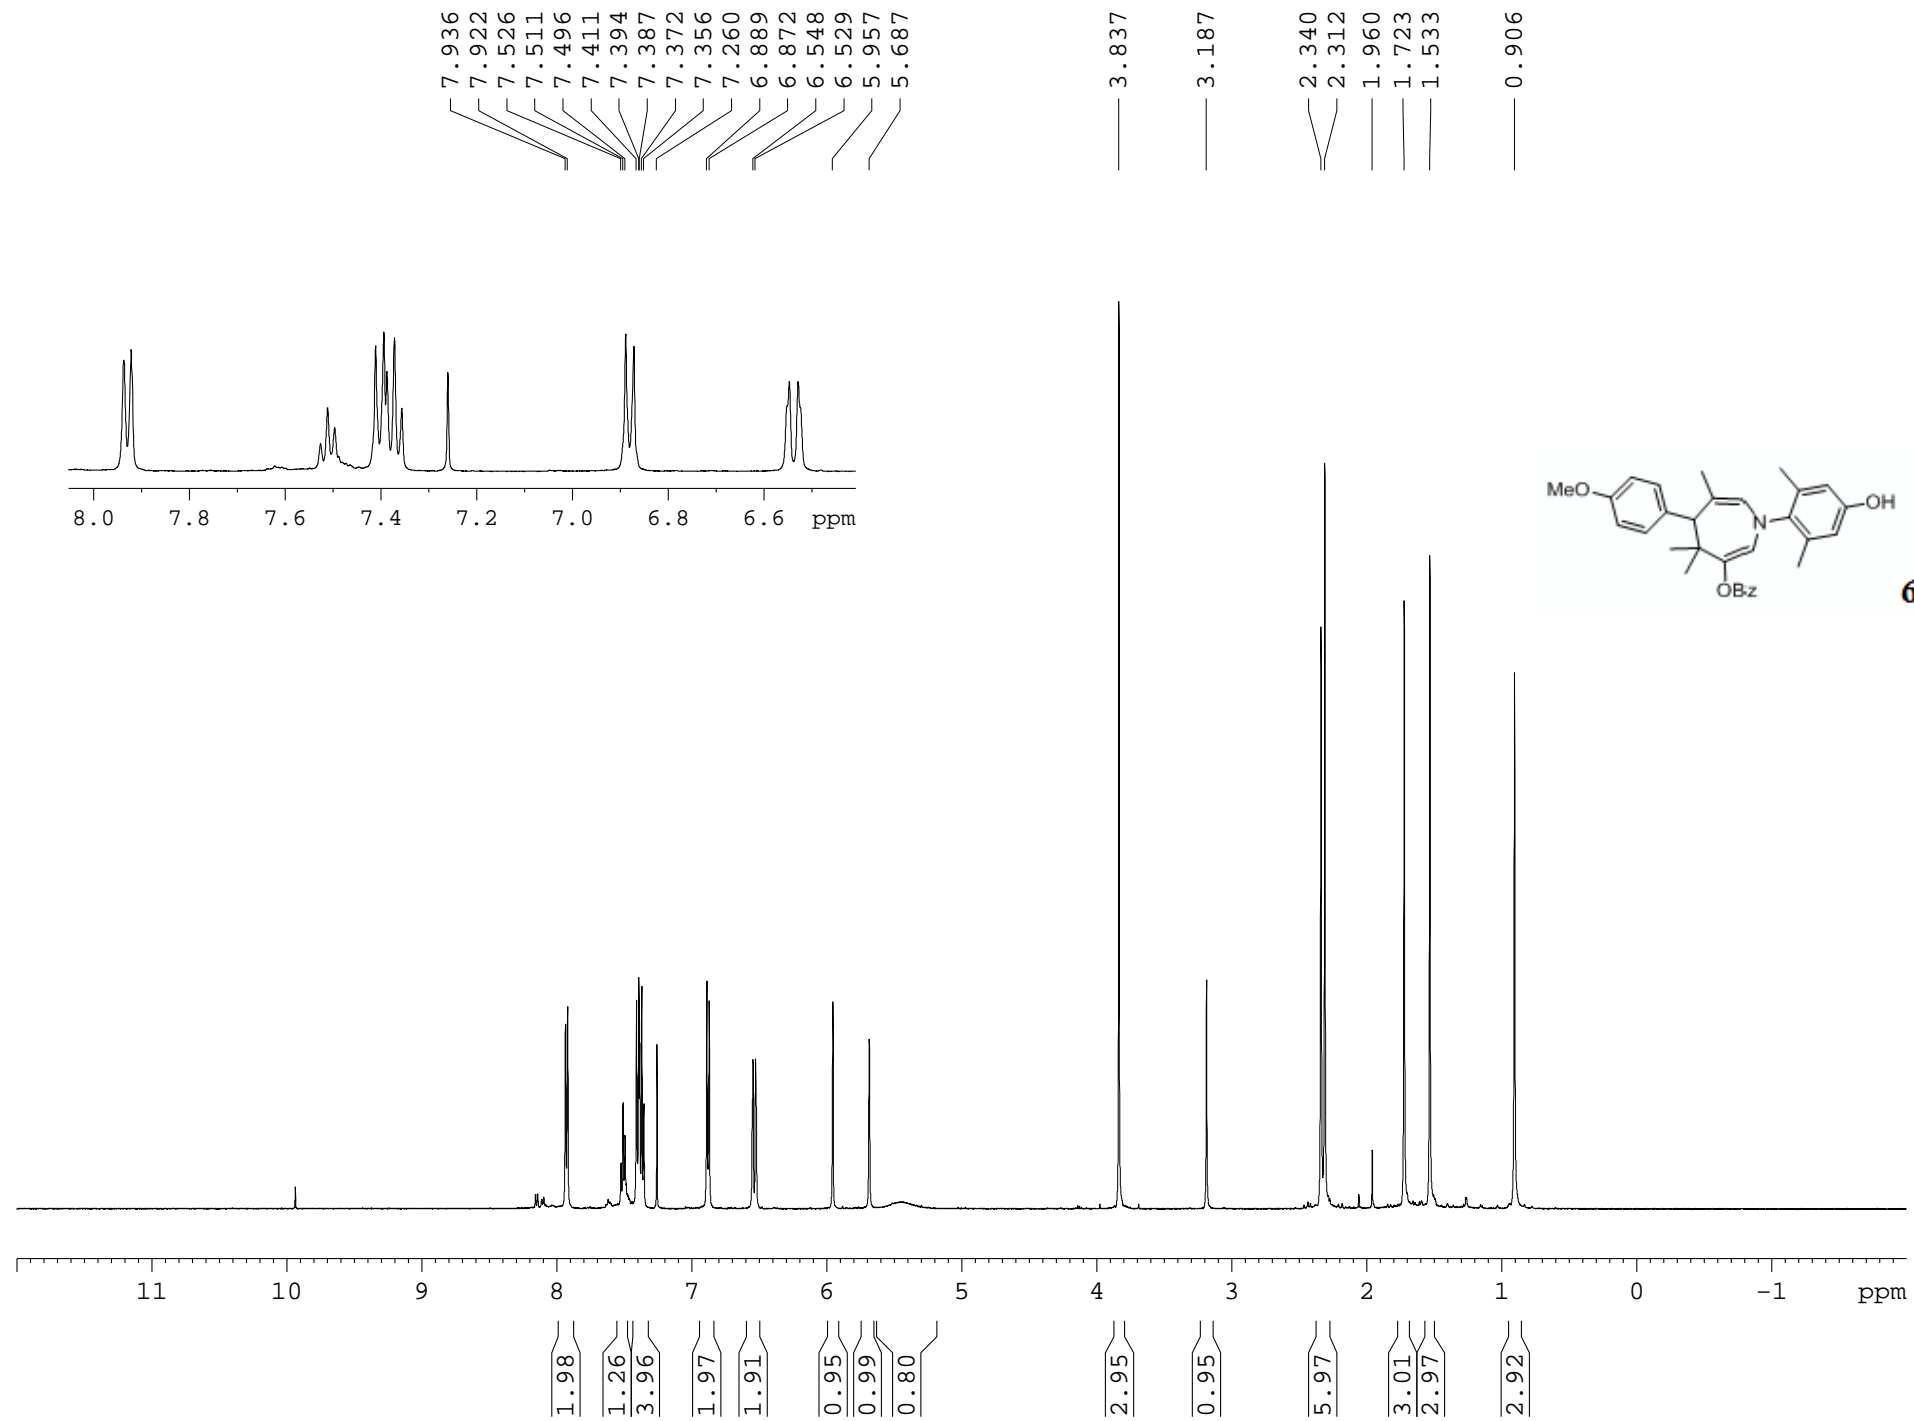



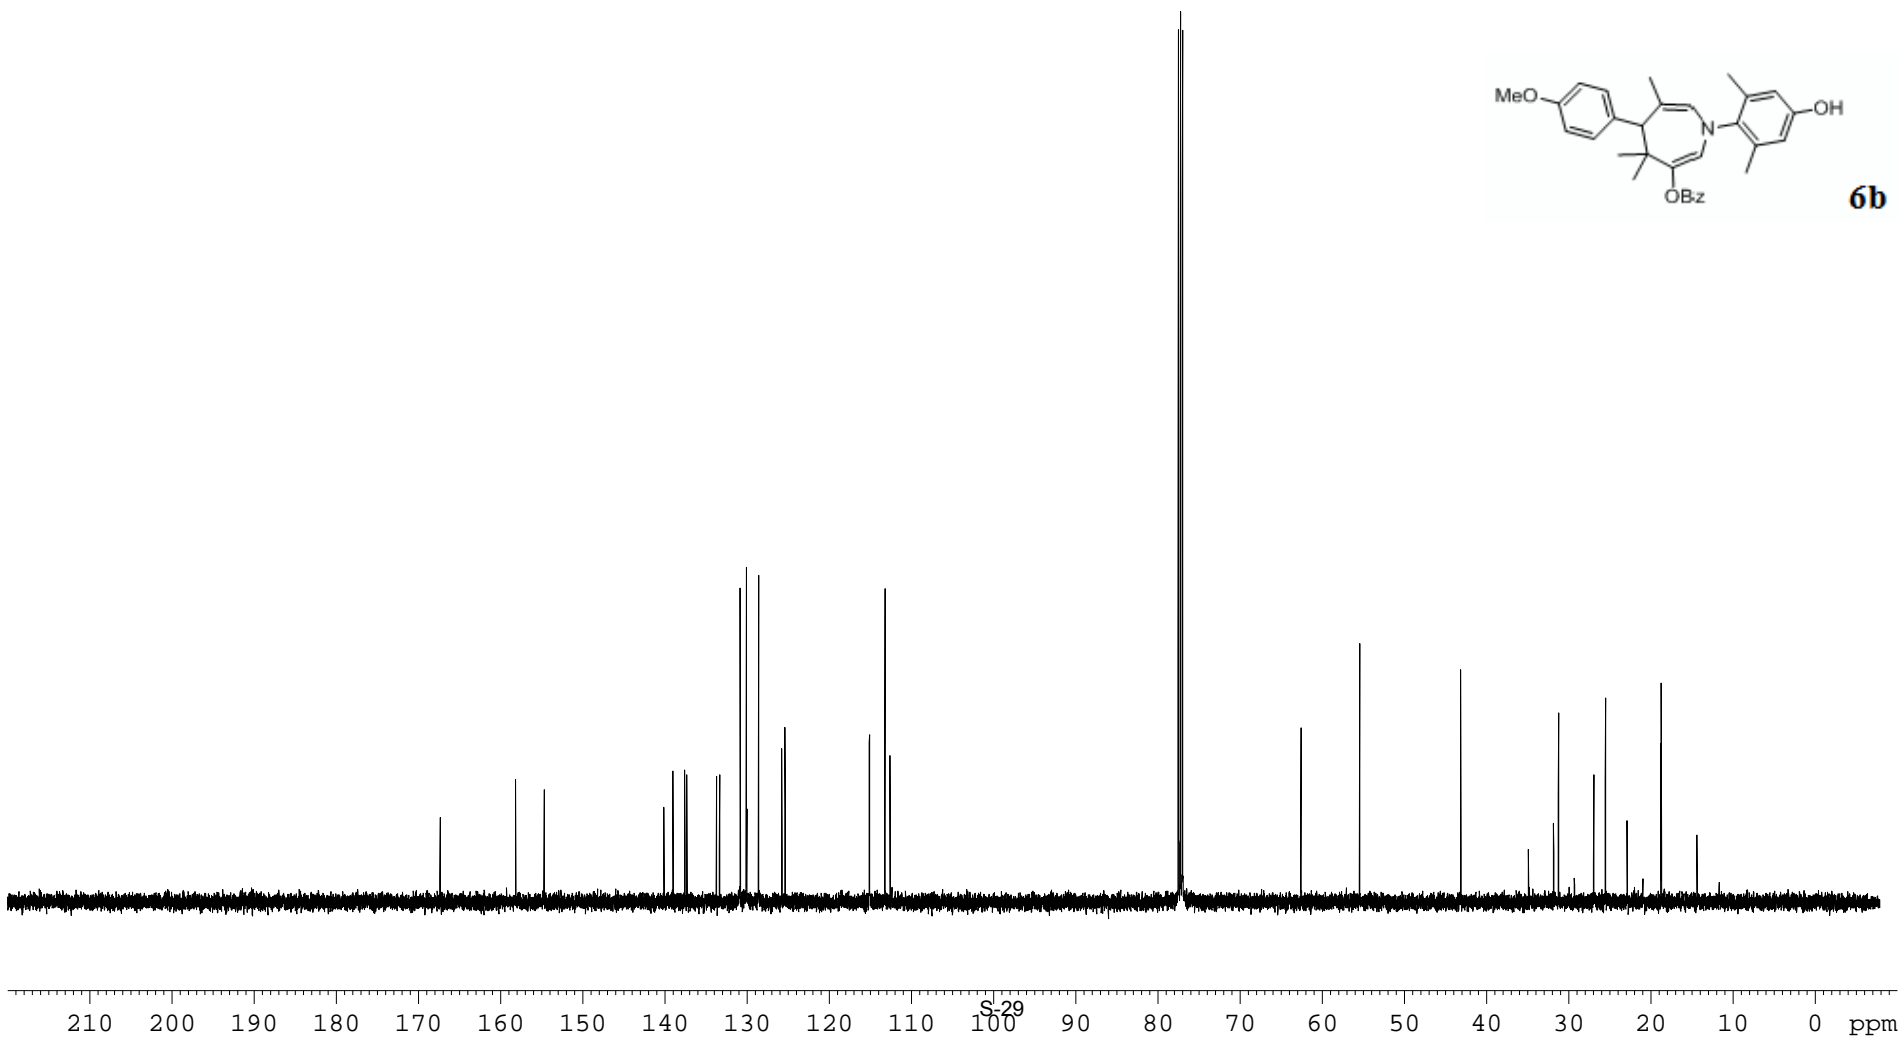

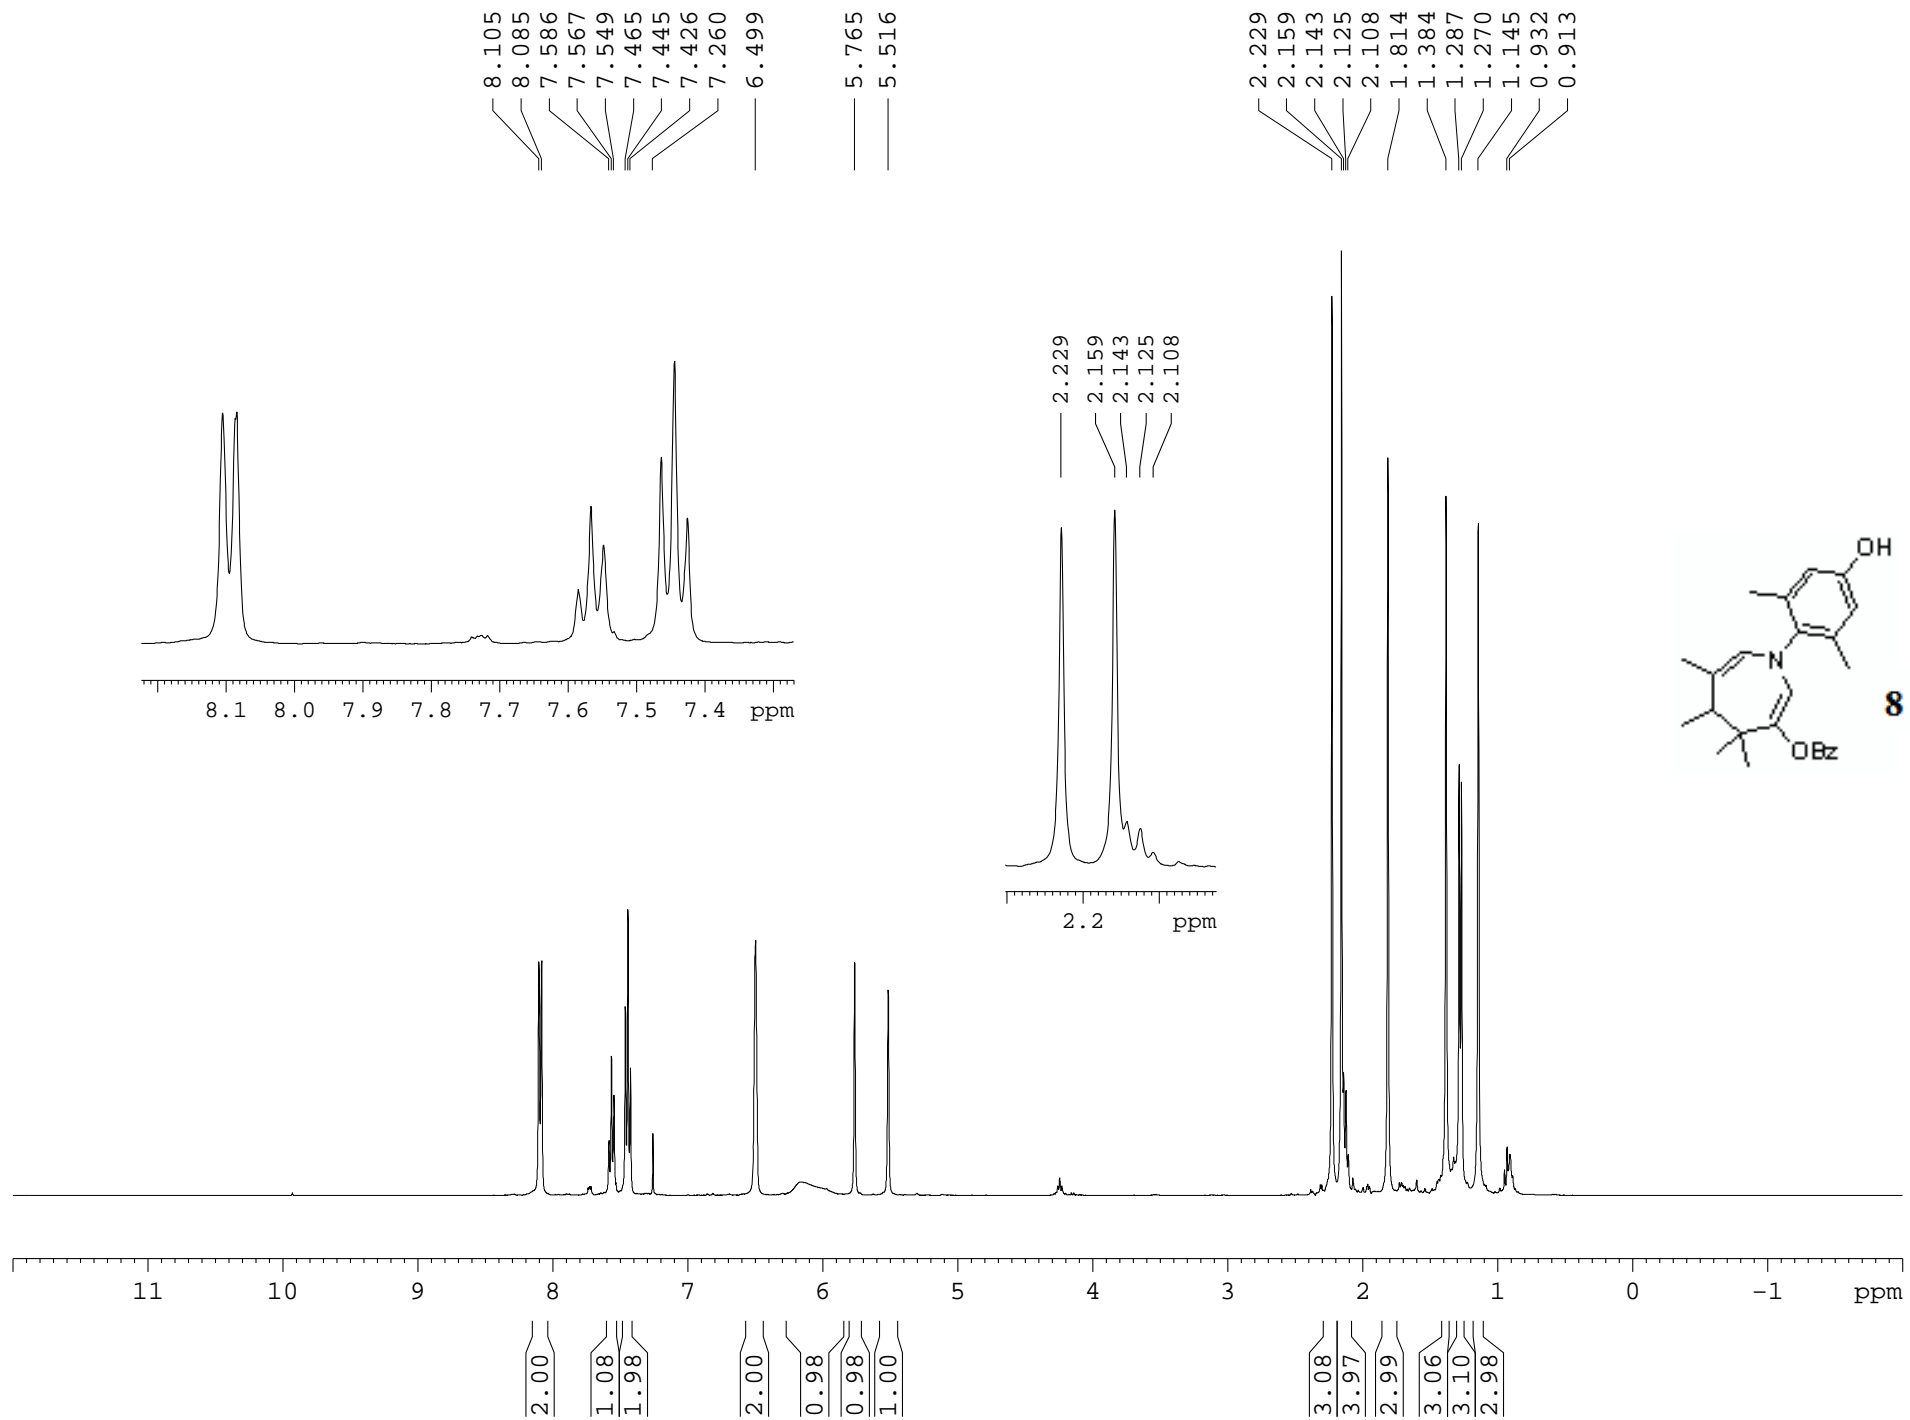

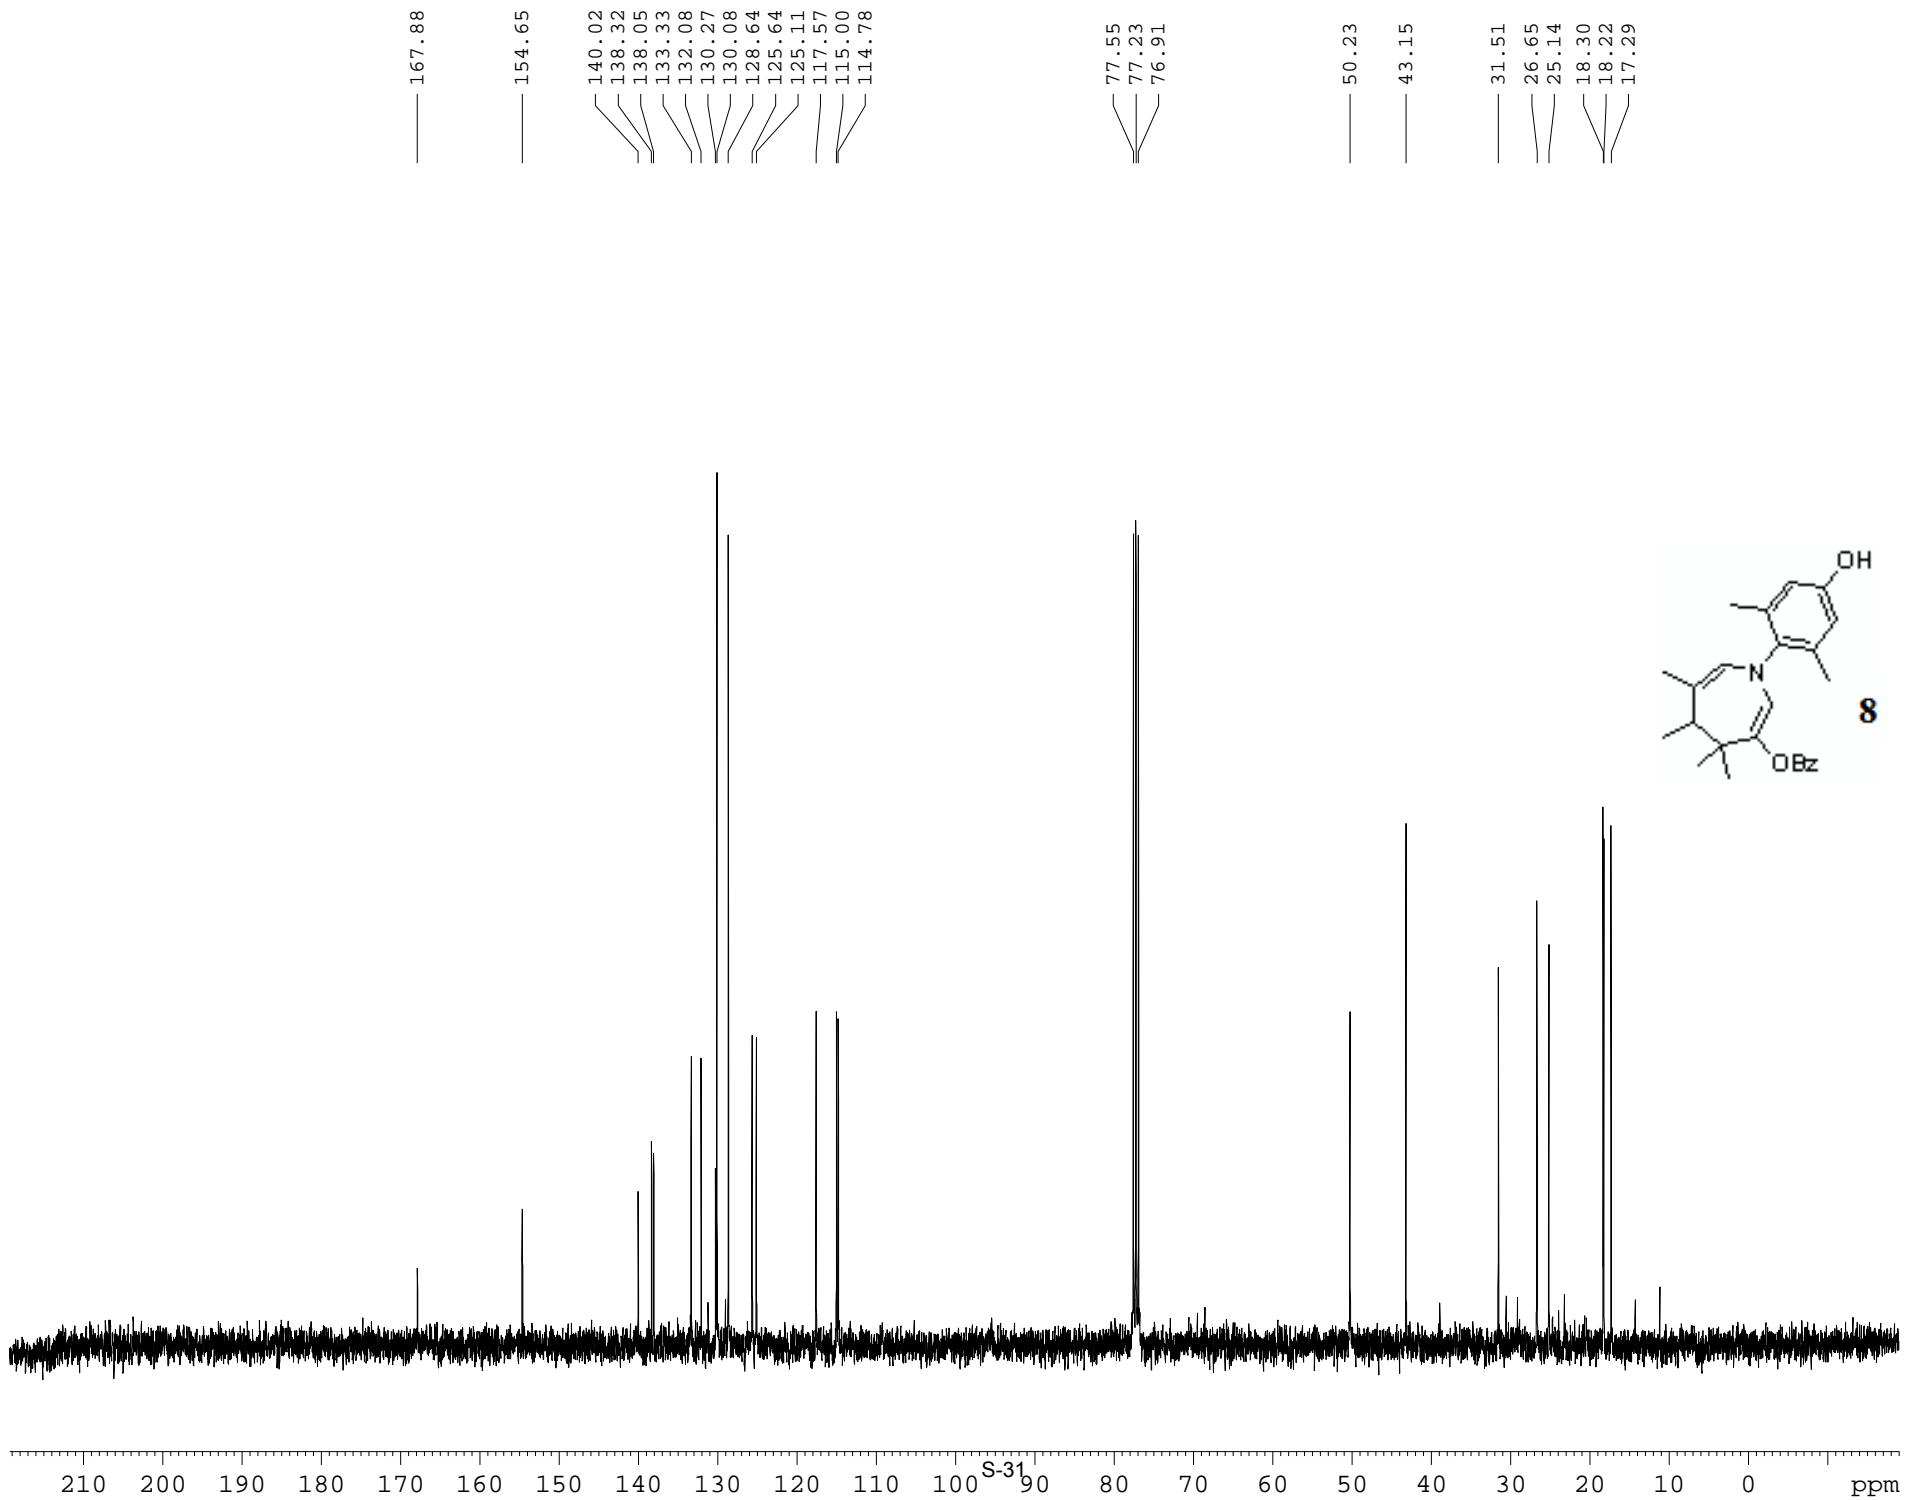

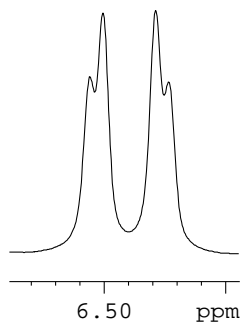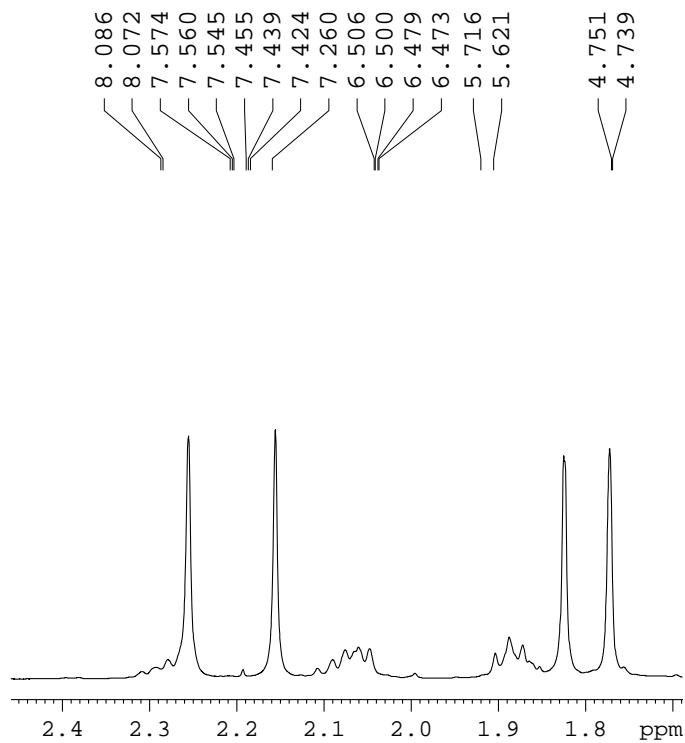

8.086  
8.072  
7.574  
7.560  
7.545  
7.455  
7.439  
7.424  
7.260  
6.506  
6.500  
6.479  
6.473  
5.716  
5.621

4.751  
4.739

2.292  
2.279  
2.256  
2.156  
2.107  
2.090  
2.076  
2.060  
2.047  
1.903  
1.888  
1.872  
1.853  
1.825  
1.773  
1.619  
1.363  
1.191  
0.977  
0.888

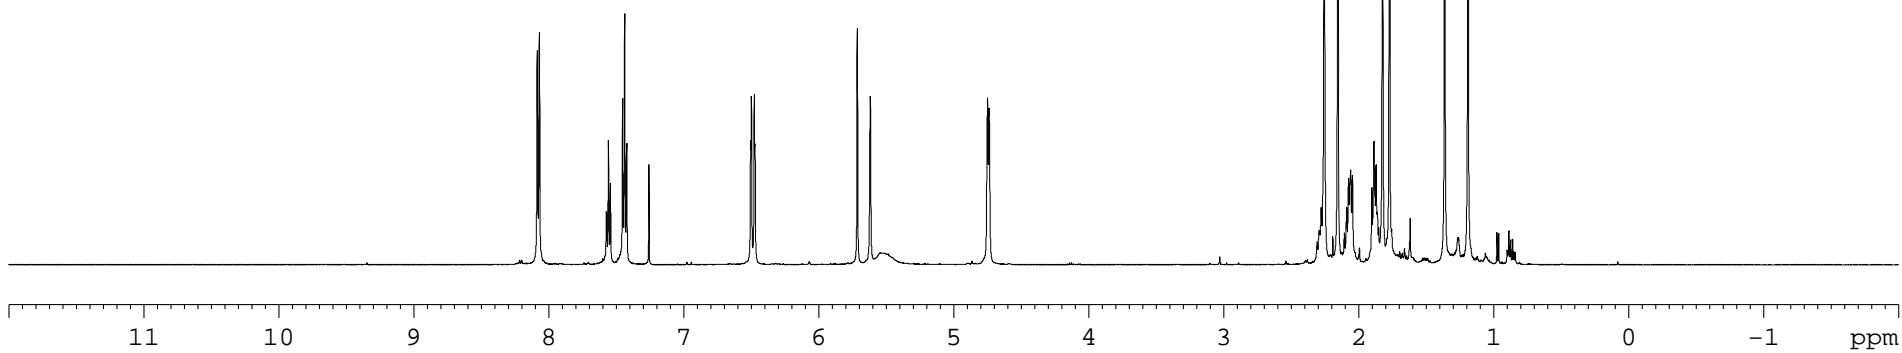

2.09  
1.08  
2.12  
2.00  
1.02  
1.06  
0.82  
2.08

4.07  
2.99  
2.36  
2.15  
3.02  
3.33  
3.11  
3.15

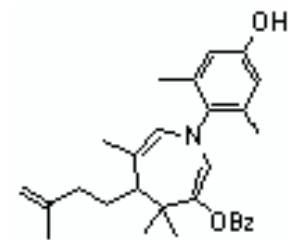

**10**

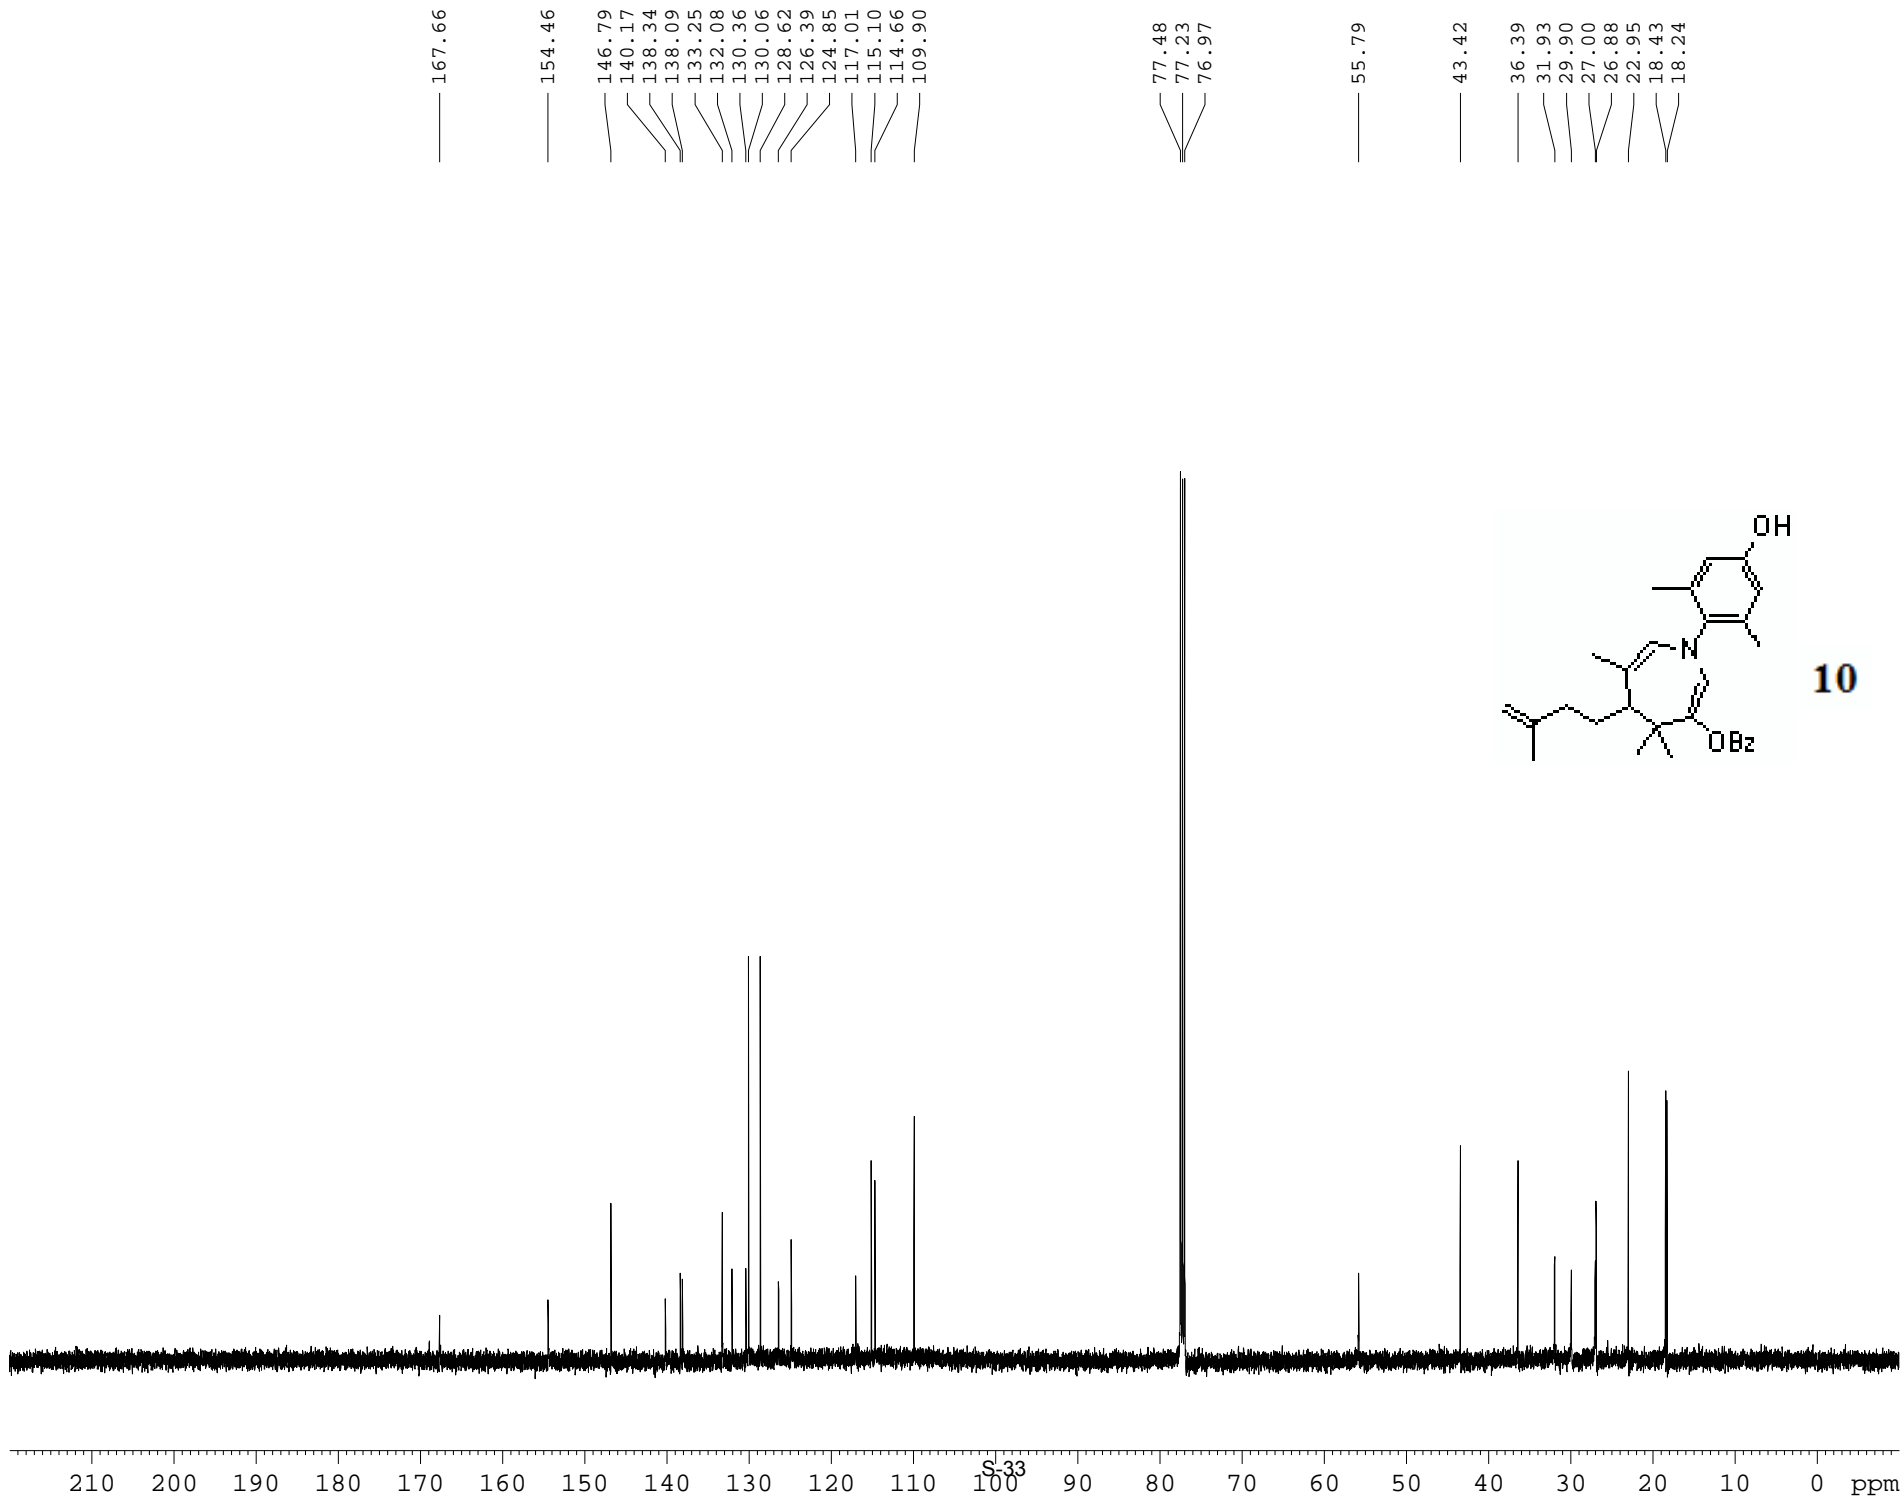

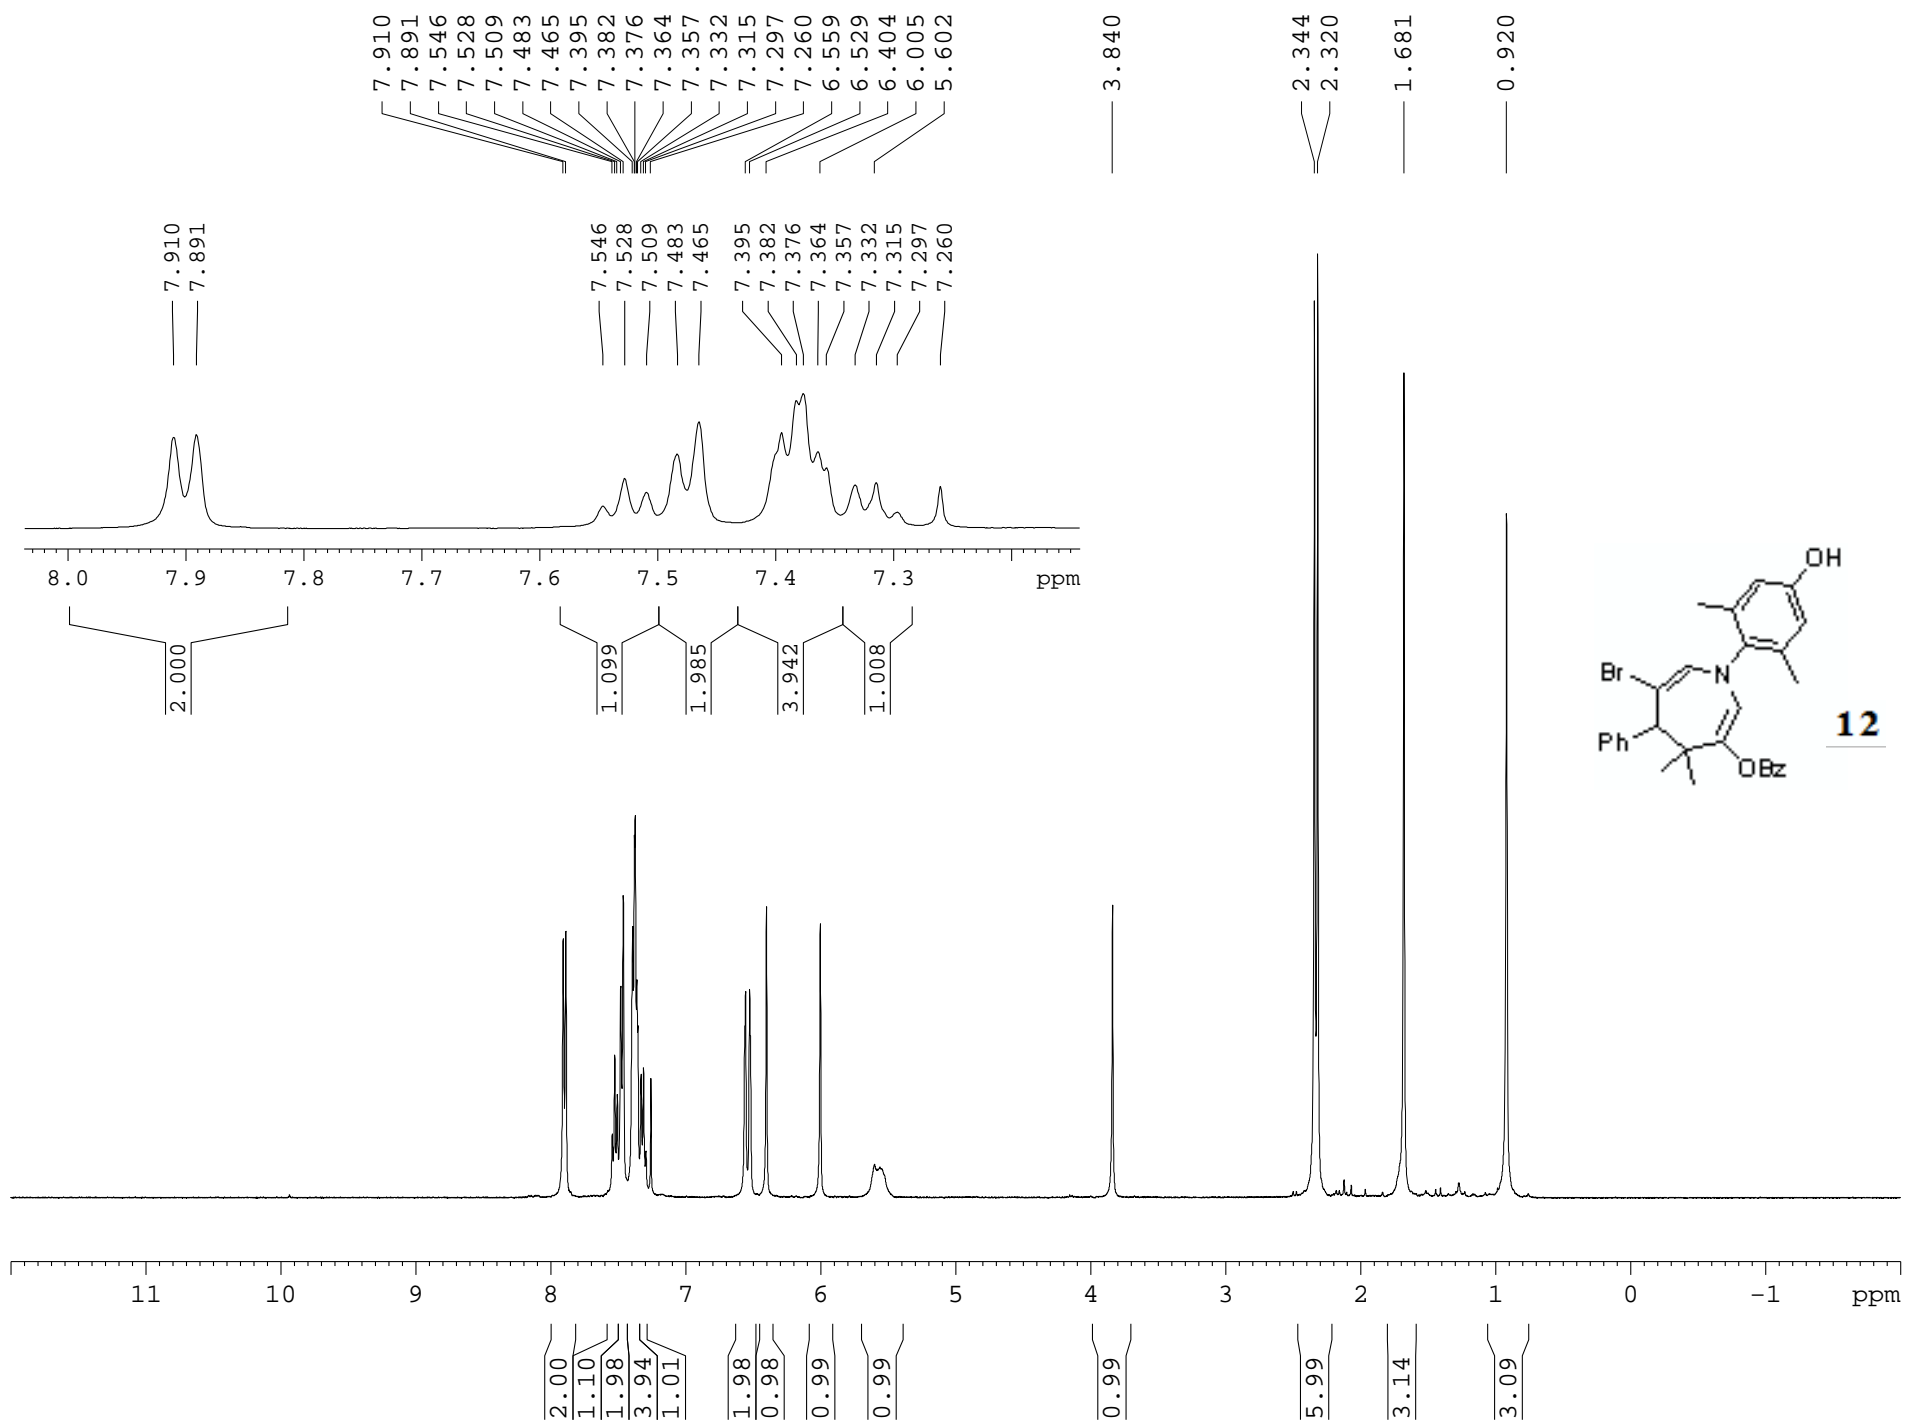

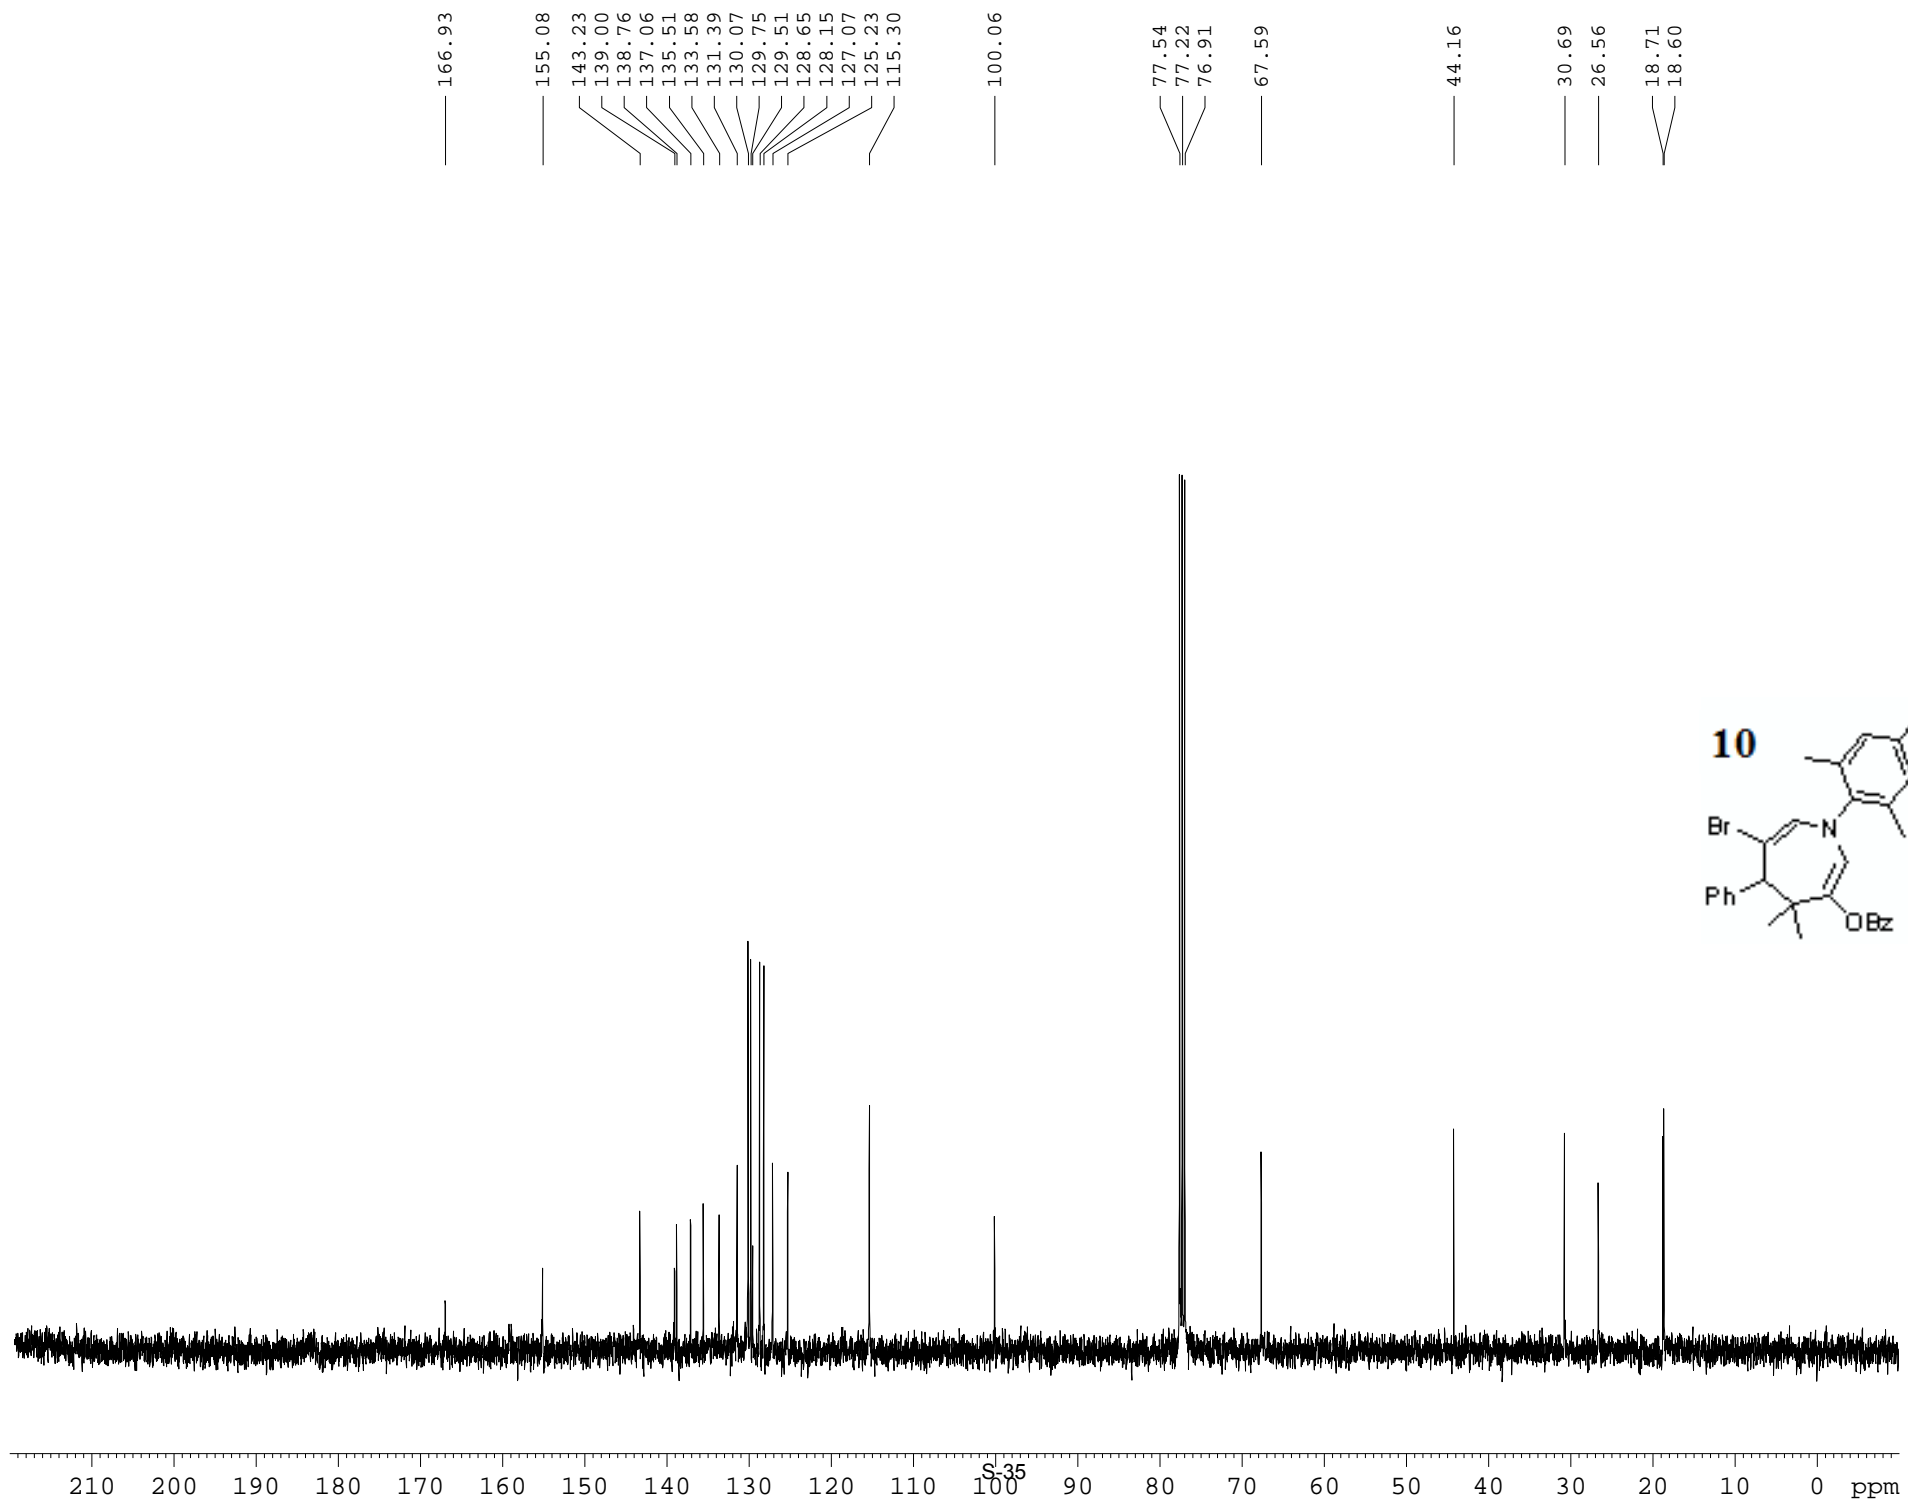

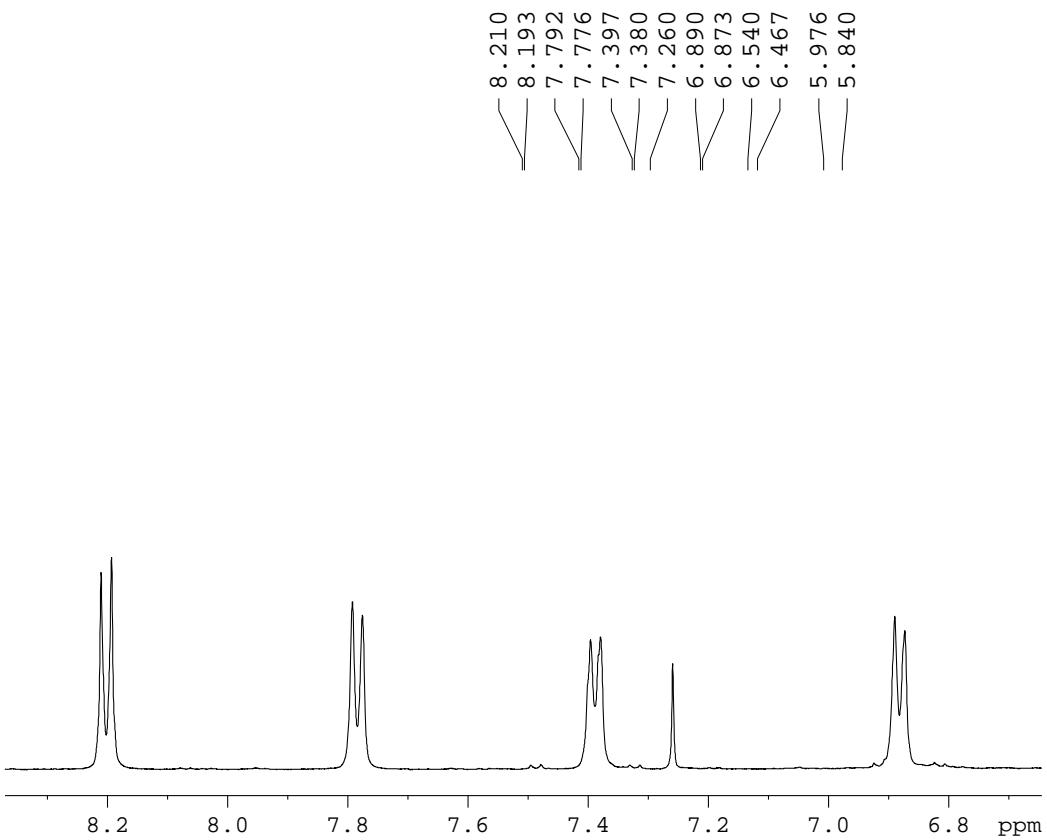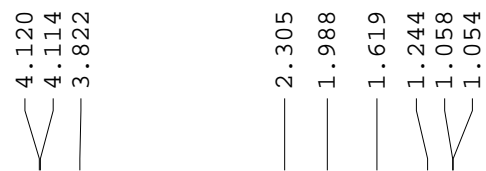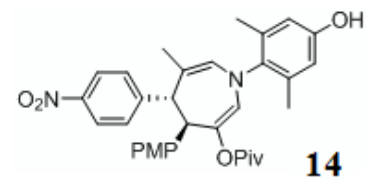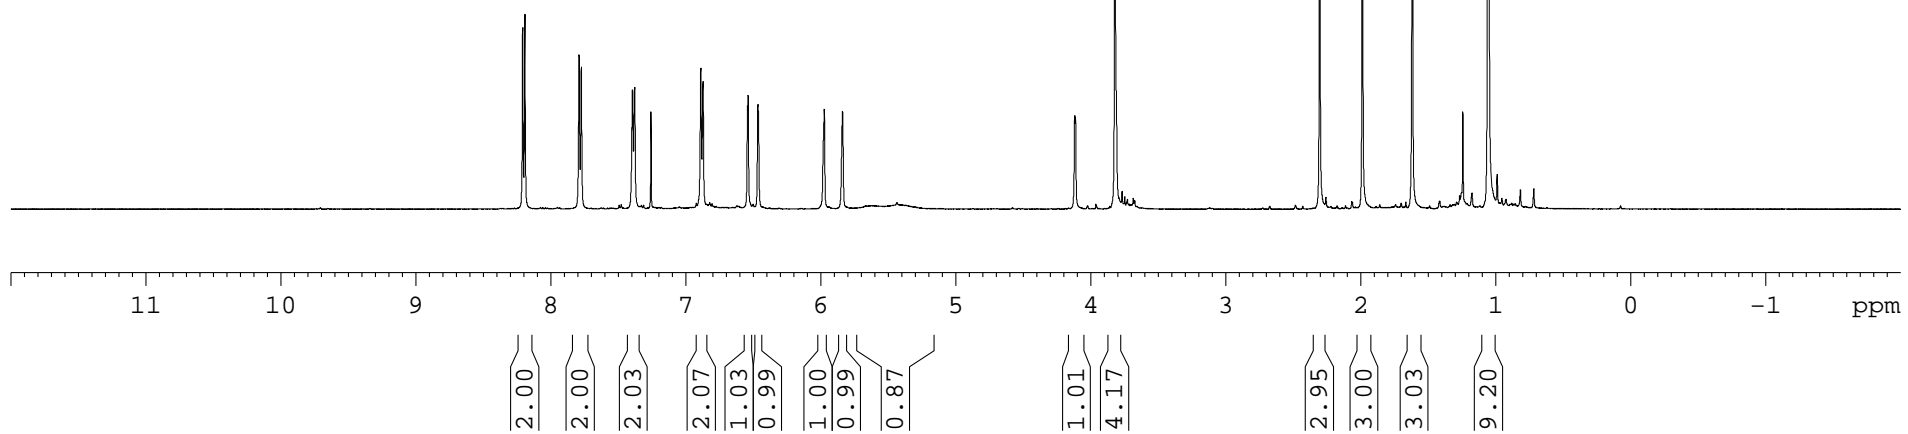



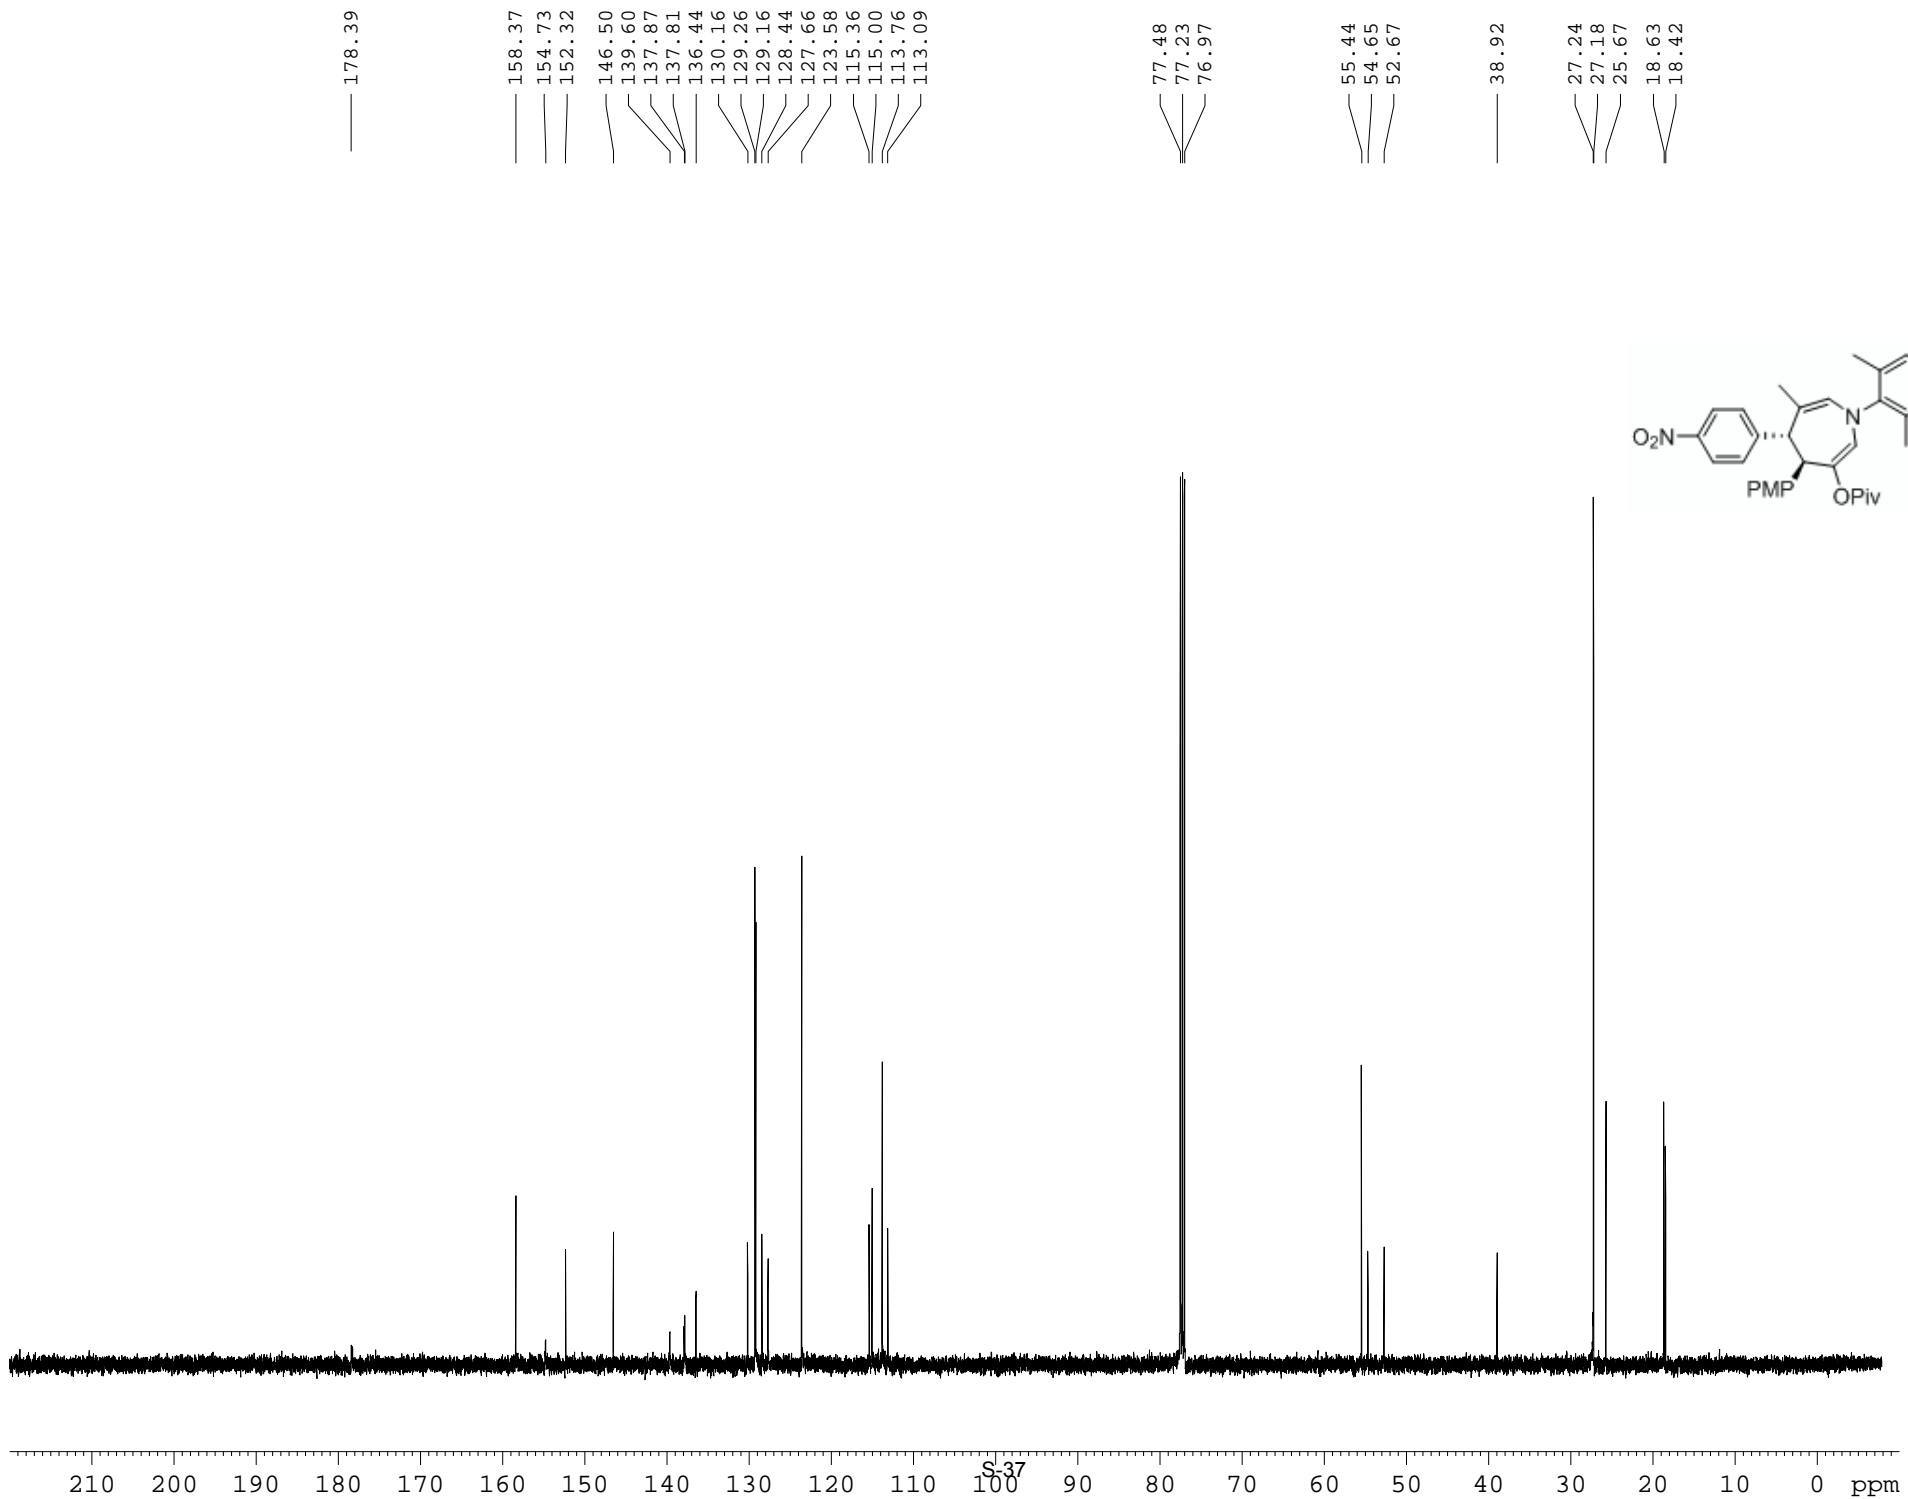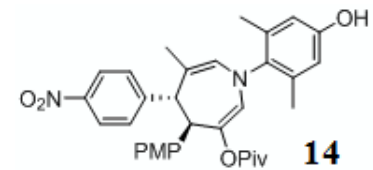

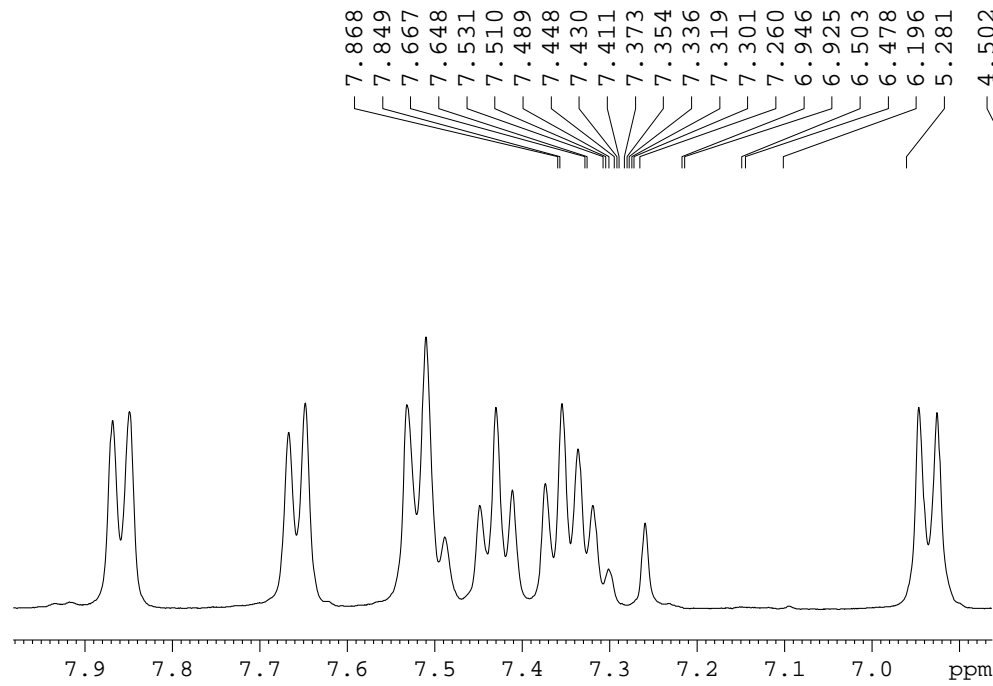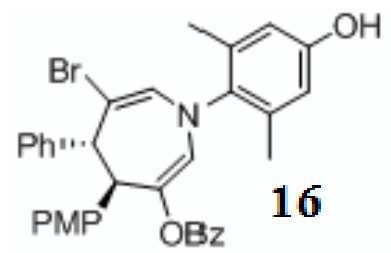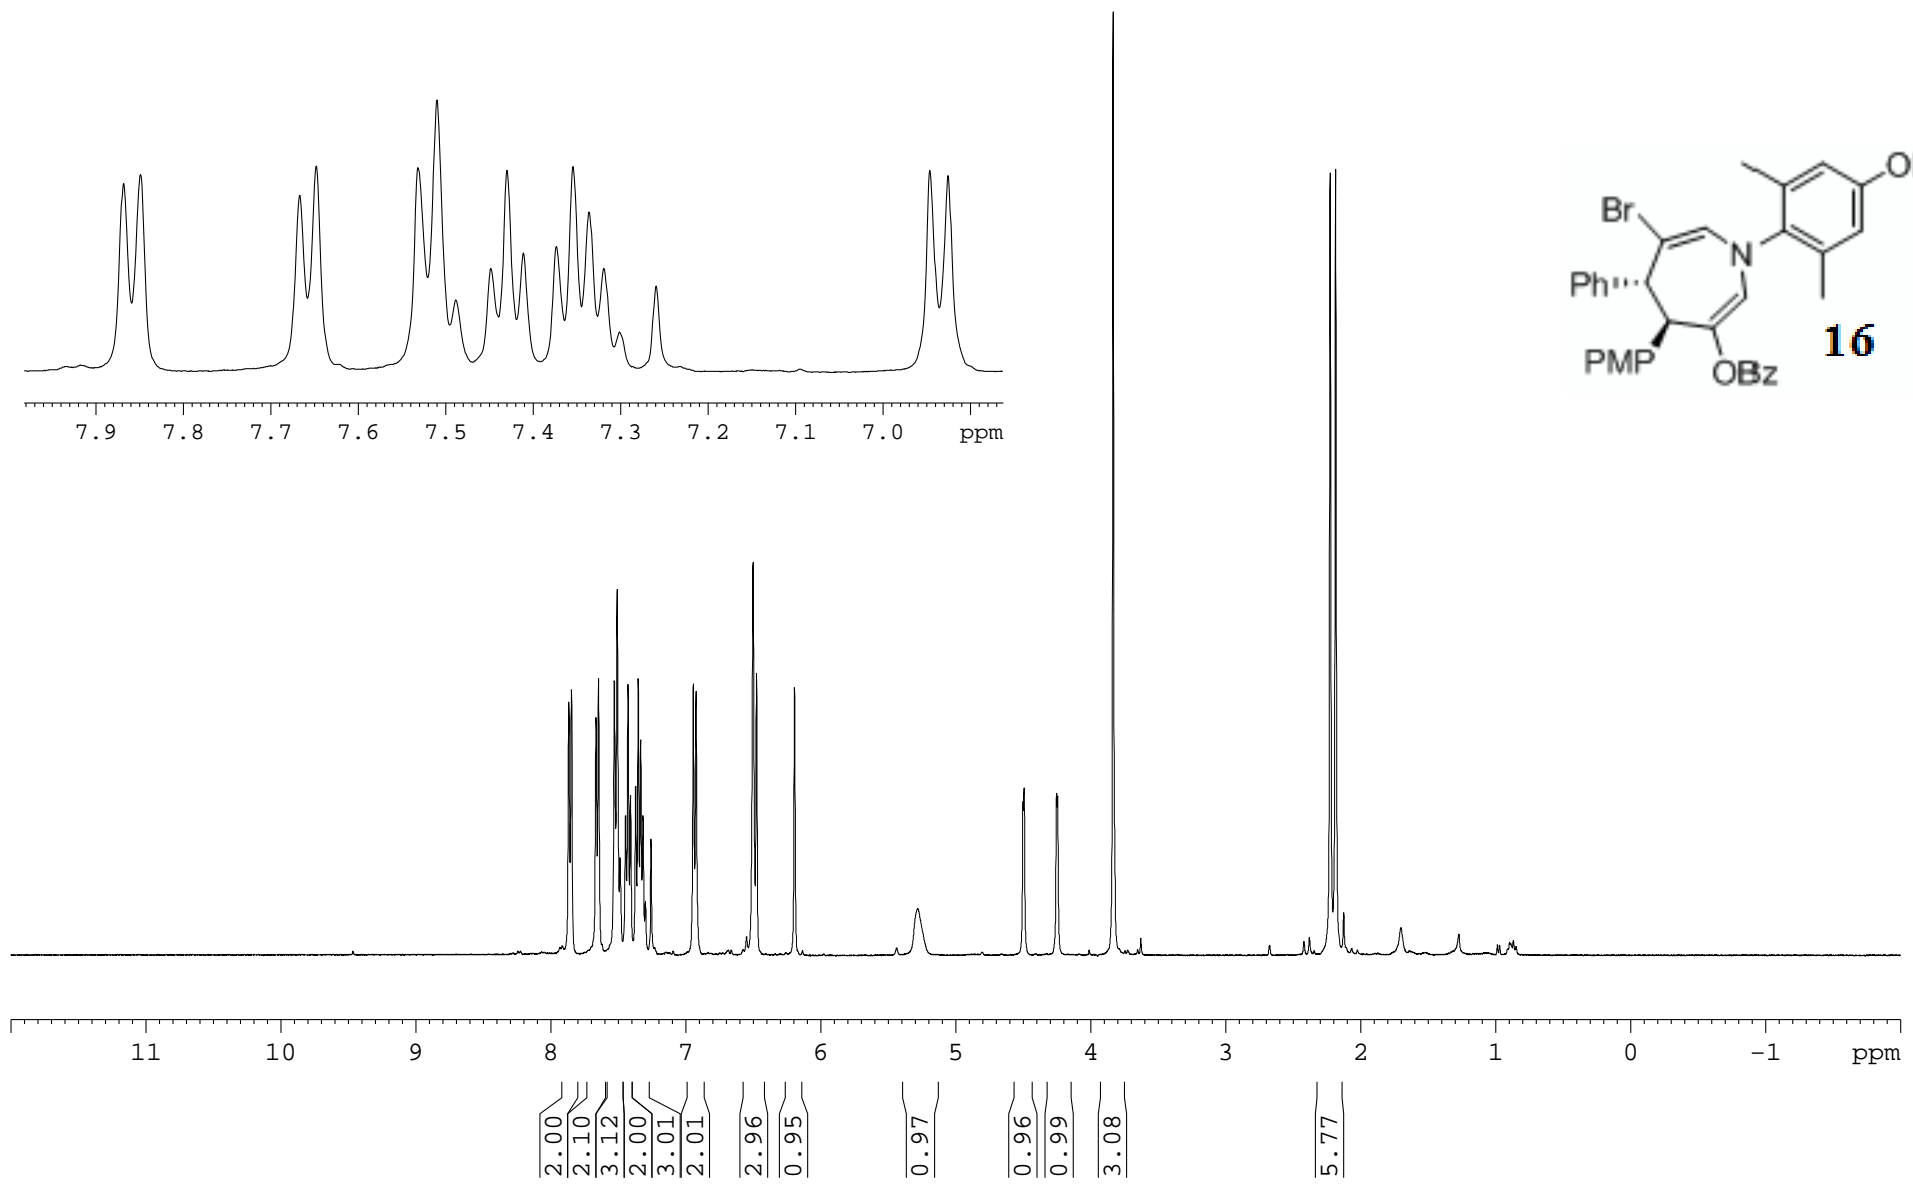

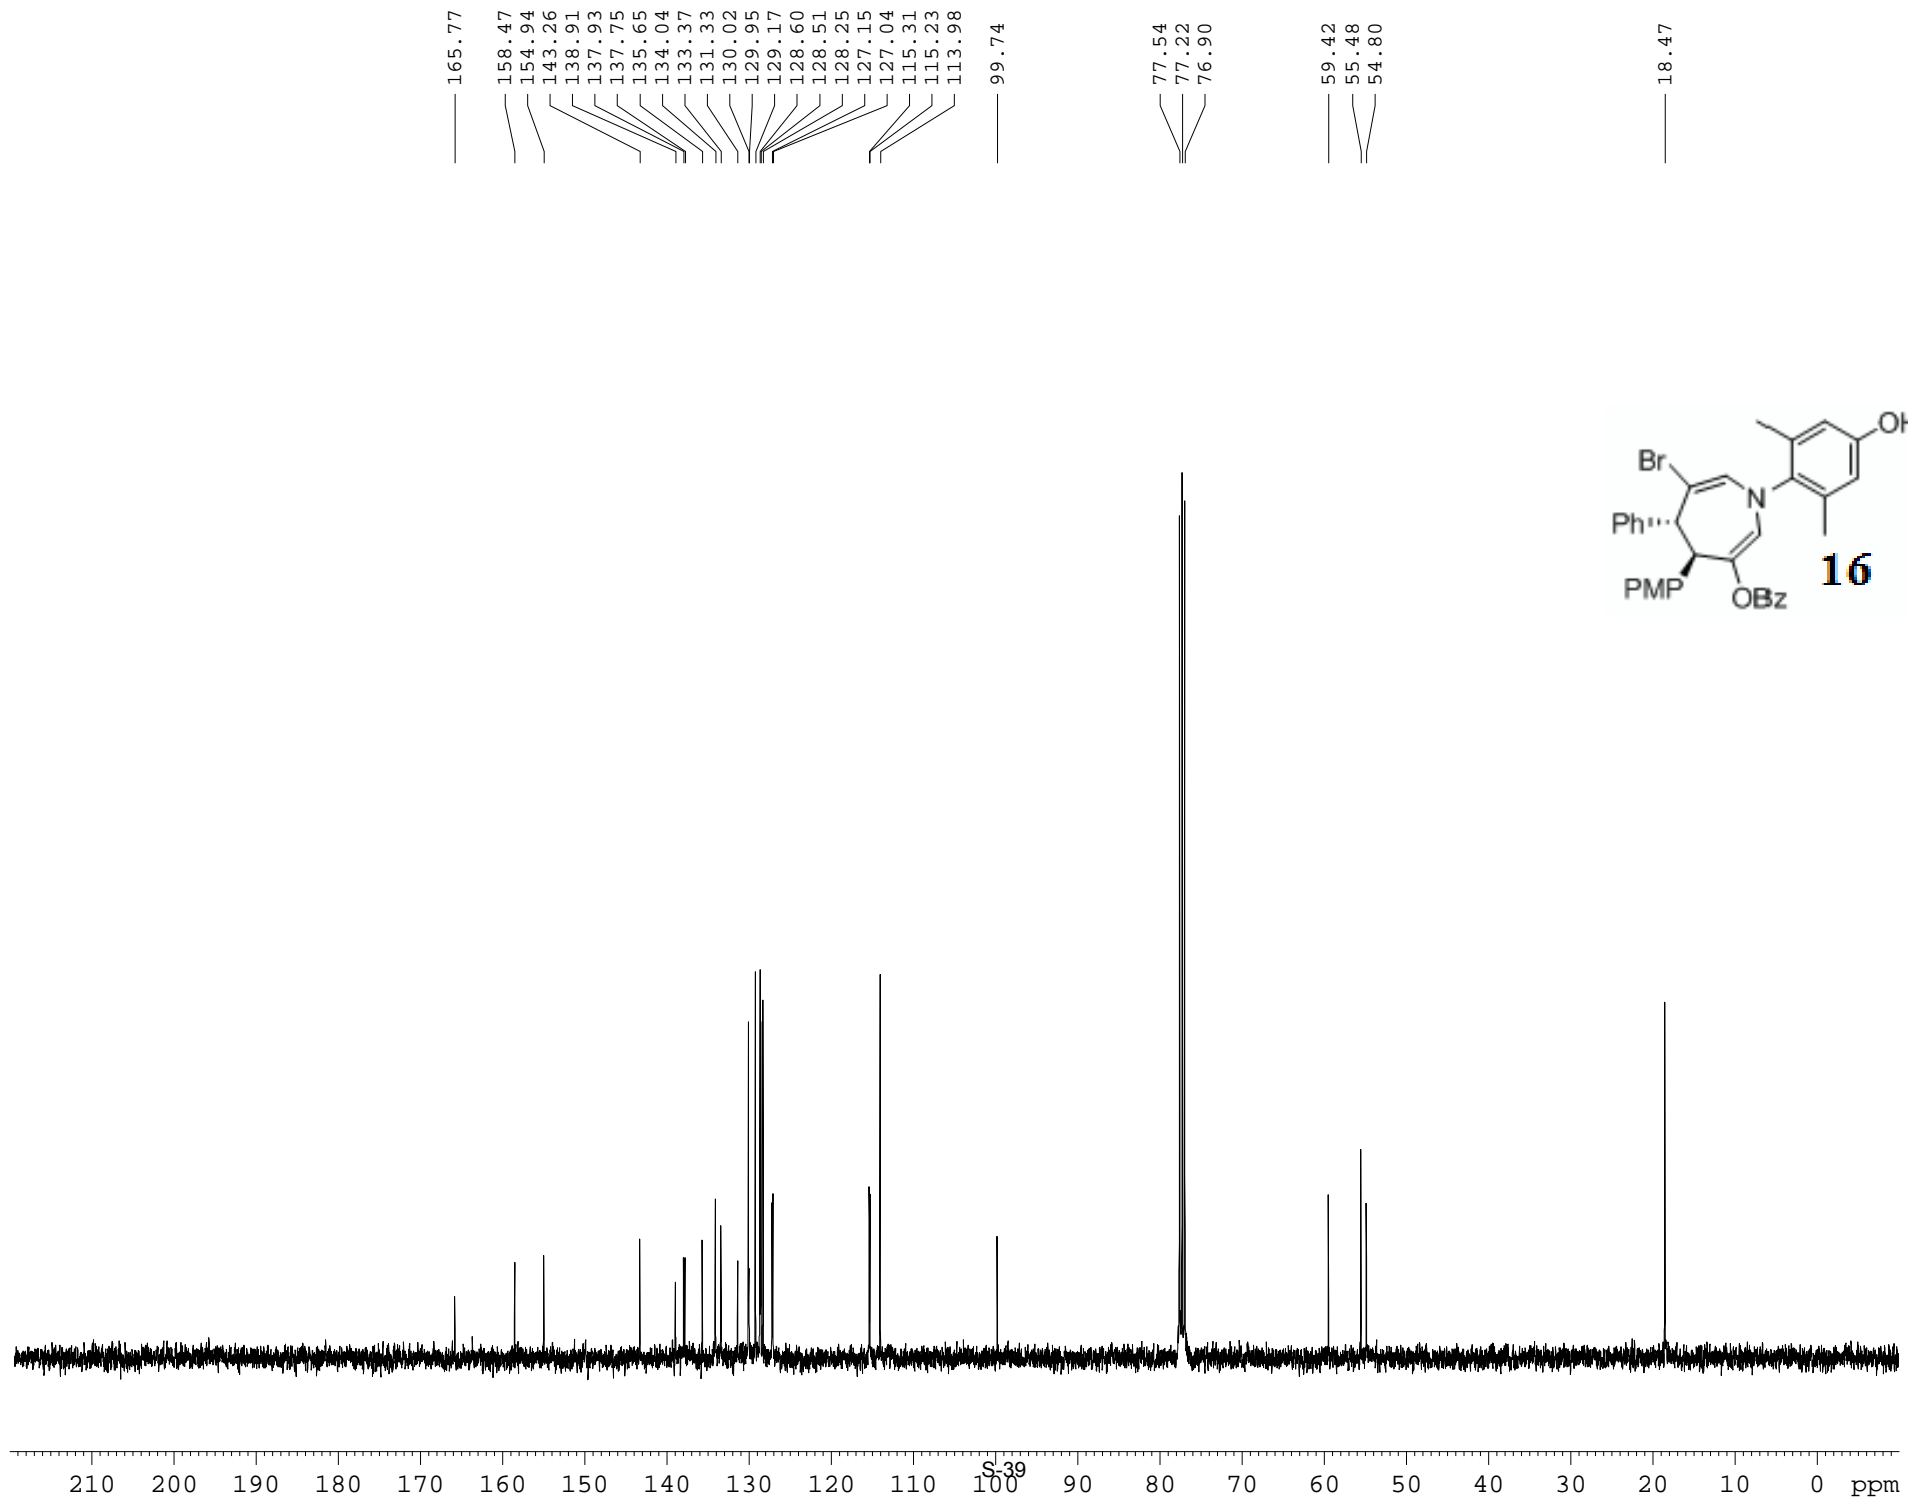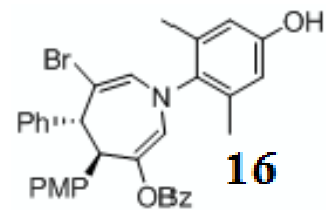

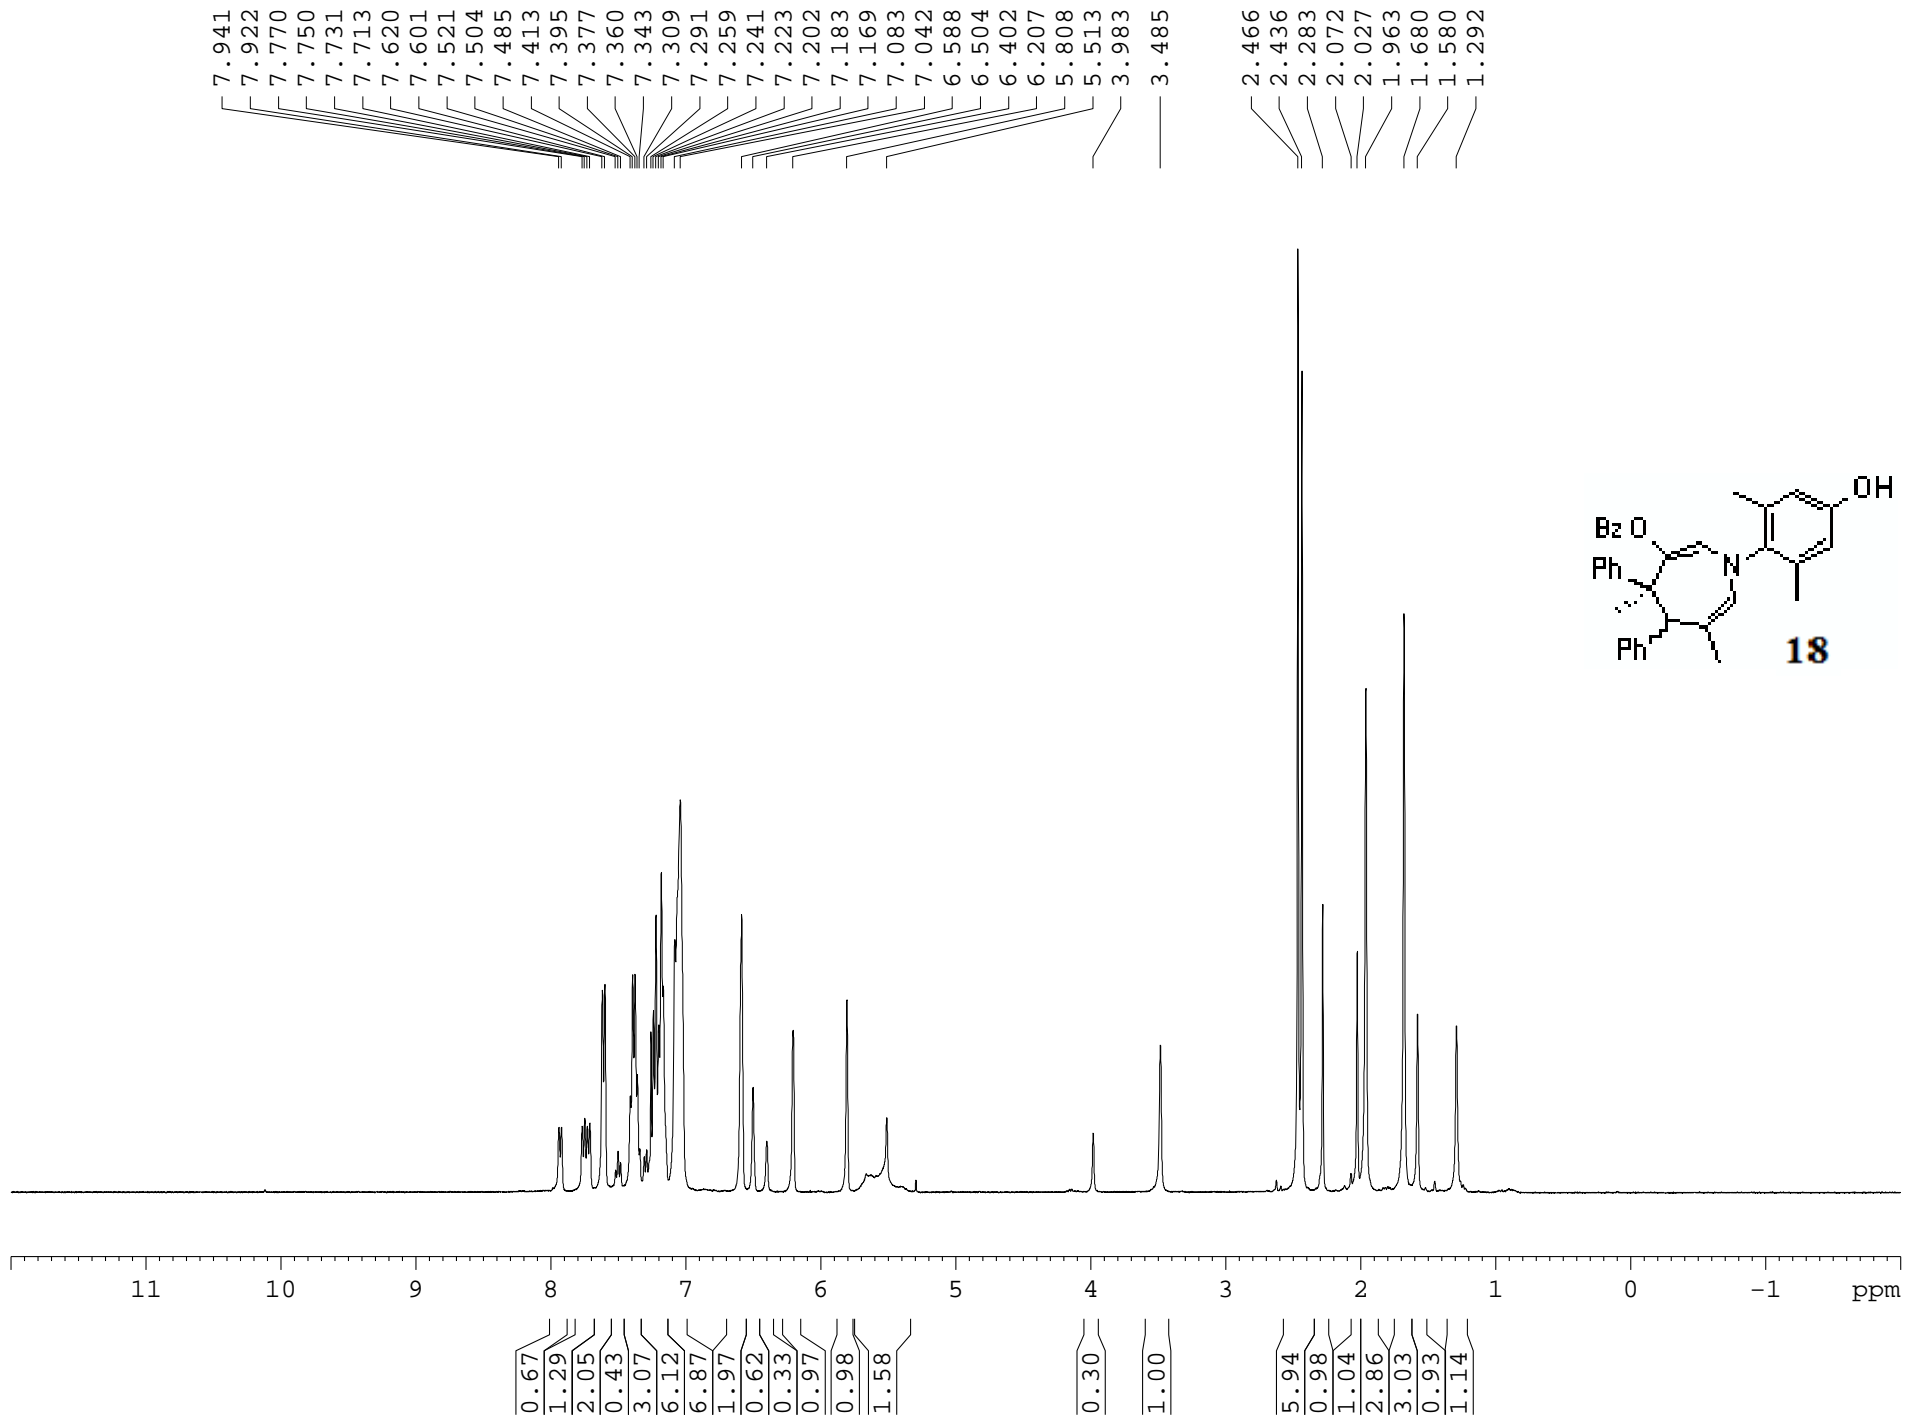

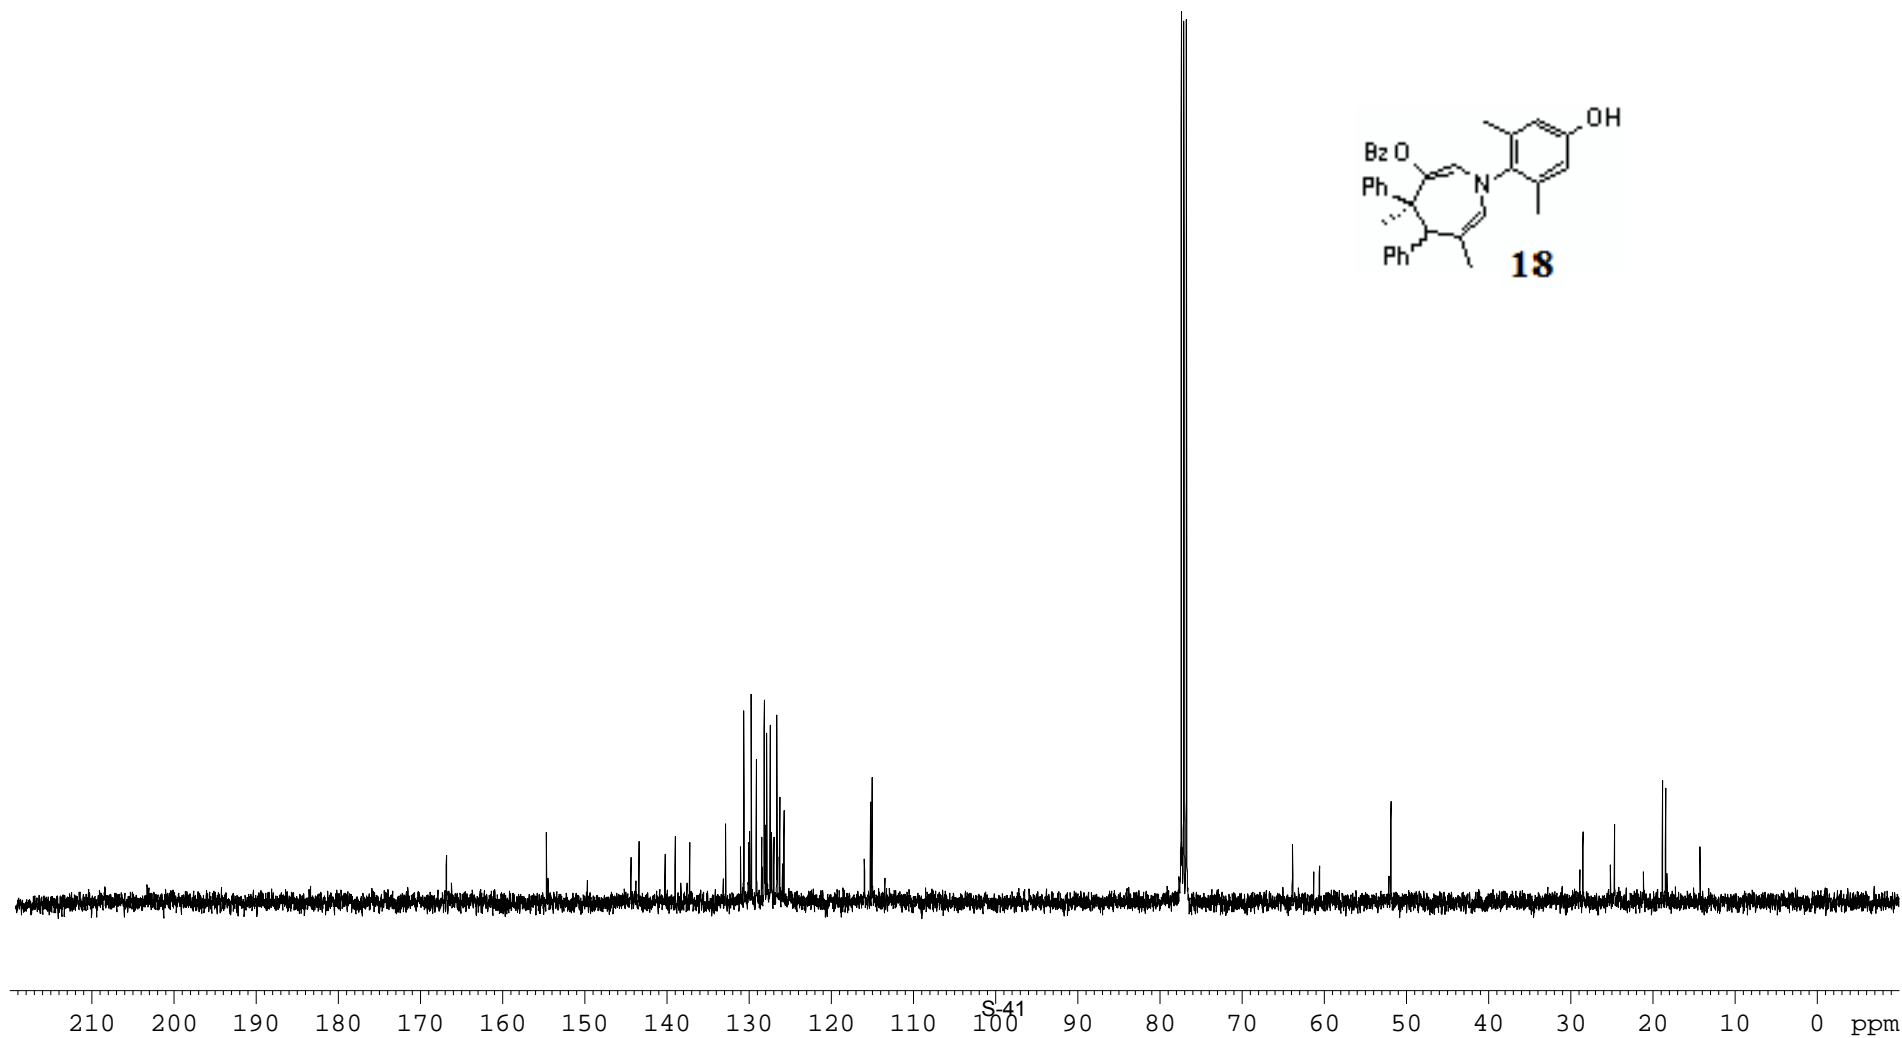

166.78  
 166.15  
 154.61  
 154.38  
 149.62  
 144.30  
 143.72  
 143.33  
 140.16  
 138.92  
 138.22  
 137.48  
 137.16  
 133.07  
 132.79  
 130.97  
 130.57  
 130.00  
 129.87  
 129.67  
 129.04  
 128.39  
 128.33  
 128.09  
 127.99  
 127.78  
 127.36  
 127.20  
 127.14  
 126.91  
 126.55  
 126.46  
 126.20  
 125.86  
 125.68  
 115.89  
 115.15  
 114.96  
 113.41  
 77.65  
 77.38  
 77.27  
 77.06  
 76.75  
 63.84  
 61.26  
 60.56  
 52.10  
 51.87  
 28.87  
 28.49  
 25.15  
 24.63  
 21.12  
 18.80  
 18.42  
 18.27  
 14.23

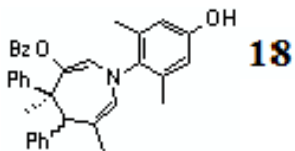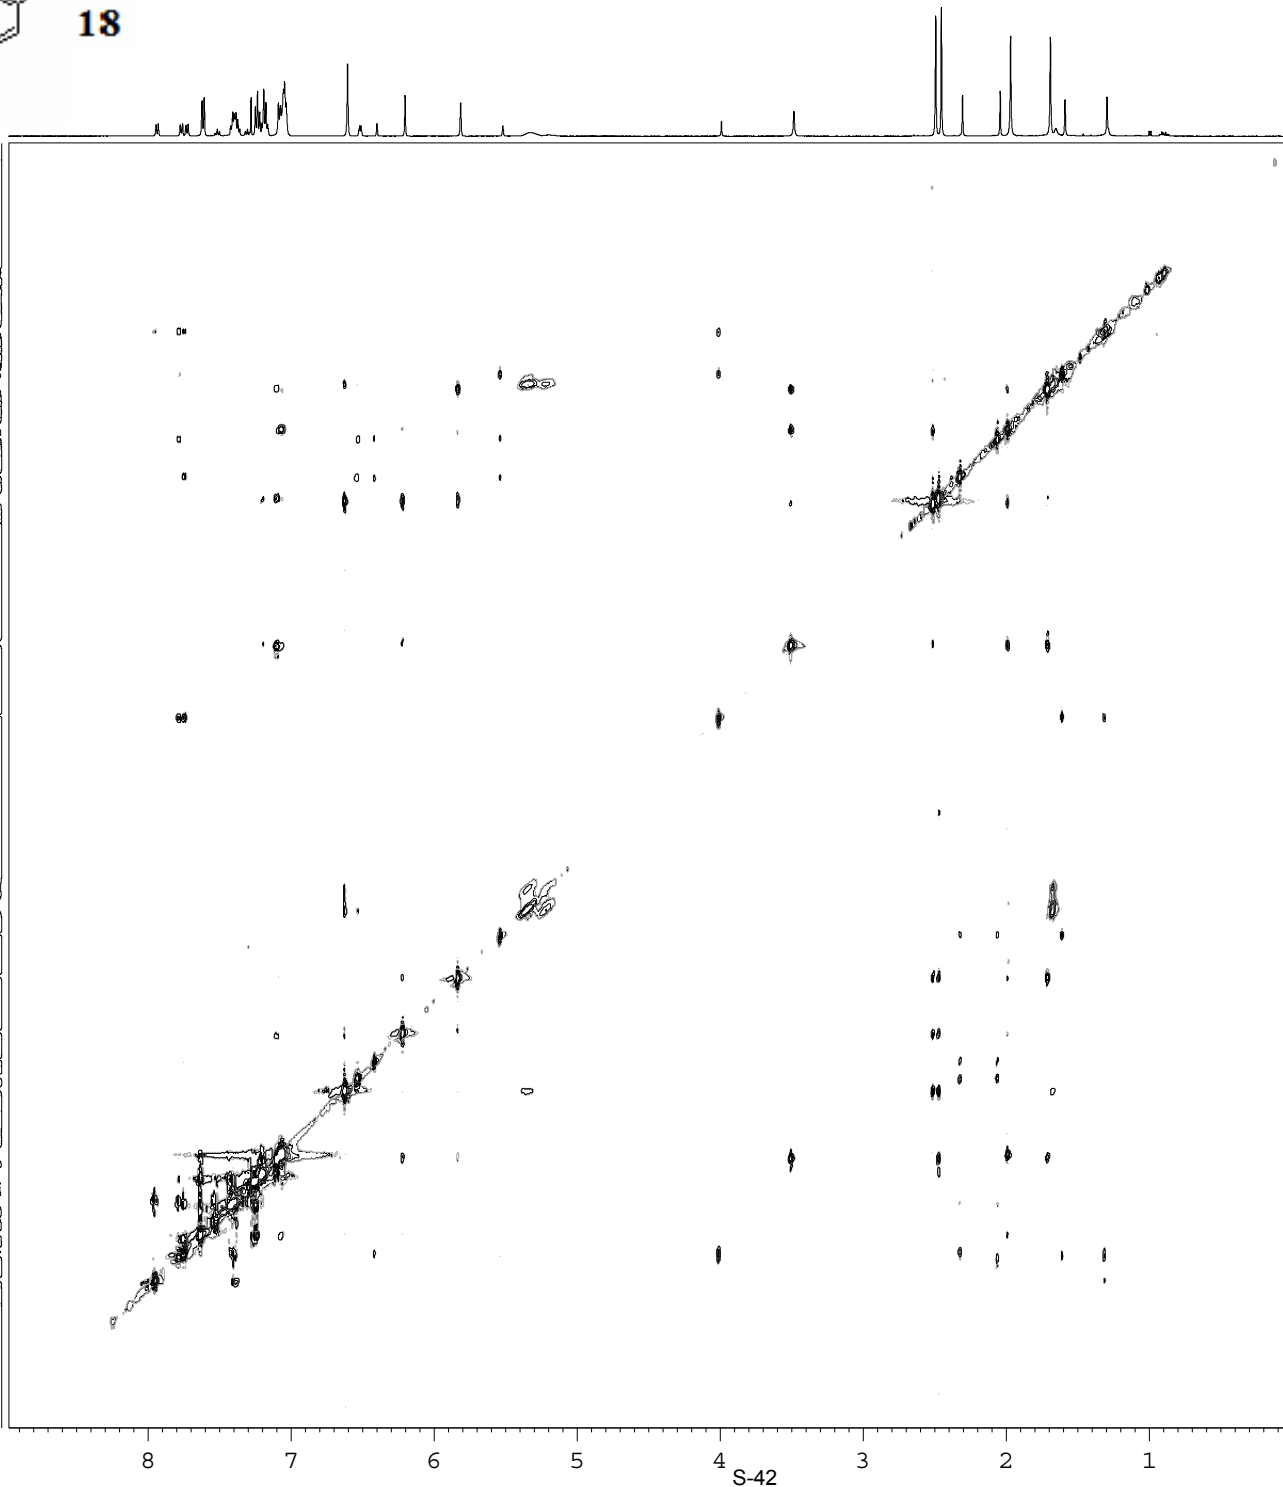

Current Data Parameters  
 USER nshapiro  
 NAME 09-129-noesy-2  
 EXPNO 11  
 PROCNO 1

F2 - Acquisition Parameters  
 Date\_ 20080507  
 Time 19.35  
 INSTRUM AV-500  
 PROBHD 5 mm TBI 1H/31  
 PULPROG noesygpph  
 TD 4096  
 SOLVENT CDC13  
 NS 2  
 DS 4  
 SWH 4496.403 Hz  
 FIDRES 1.097755 Hz  
 AQ 0.4555252 sec  
 RG 88  
 DW 111.200 usec  
 DE 7.11 usec  
 TE 300.0 K  
 d0 0.00010139 sec  
 D1 4.00000000 sec  
 D8 0.66000003 sec  
 D16 0.00010000 sec  
 IN0 0.00022213 sec  
 MCREST 0.00000000 sec  
 MCWRK 4.00000000 sec  
 TAU 0.32890001 sec

==== CHANNEL f1 =====  
 NUC1 1H  
 P1 7.60 usec  
 P2 15.20 usec  
 PL1 0.00 dB  
 SFO1 500.2322510 MHz

==== GRADIENT CHANNEL ====  
 GPNAM1 SINE.100  
 GPNAM2 SINE.100  
 GPX1 0.00 %  
 GPX2 0.00 %  
 GPY1 0.00 %  
 GPY2 0.00 %  
 GPZ1 40.00 %  
 GPZ2 -40.00 %  
 P16 1000.00 usec

F1 - Acquisition parameters  
 ND0 1  
 TD 128  
 SFO1 500.2323 MHz  
 FIDRES 35.171638 Hz  
 SW 9.000 ppm  
 FMODE TPPI

F2 - Processing parameters  
 SI 2048  
 SF 500.2300104 MHz  
 WDW QSINE  
 SSB 2  
 LB 0.00 Hz  
 GB 0  
 PC 4.00

F1 - Processing parameters  
 SI 2048  
 MC2 TPPI  
 SF 500.2300104 MHz  
 WDW QSINE  
 SSB 2  
 LB 0.00 Hz  
 GB 0

7.978  
7.963  
7.582  
7.567  
7.553  
7.534  
7.519  
7.431  
7.416  
7.401  
7.386  
7.375  
7.361  
7.346  
7.331  
7.280  
7.272  
7.259  
7.245  
7.230  
6.576  
6.557  
6.541  
6.527  
6.098  
5.970  
5.819  
5.696

3.518  
3.342  
2.356  
2.336  
2.304  
2.266  
2.220  
2.040  
2.028  
2.017  
2.004  
1.954  
1.942  
1.927  
1.914  
1.832  
1.769  
1.747  
1.730  
1.580  
1.543  
1.317  
1.305  
1.288  
1.276  
1.191  
1.184  
1.163  
1.107

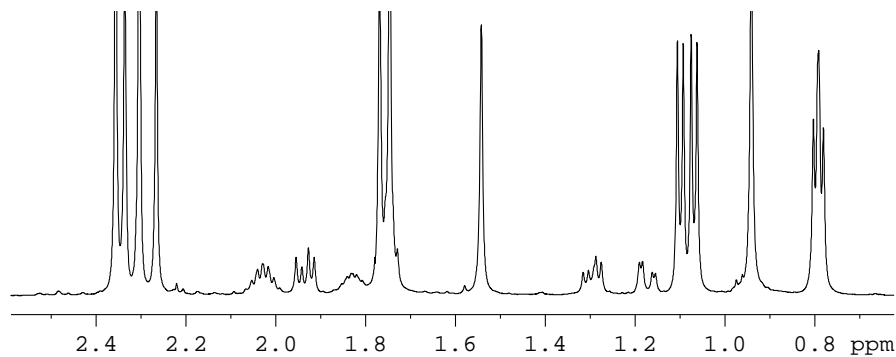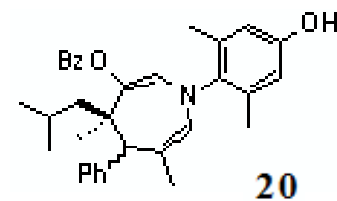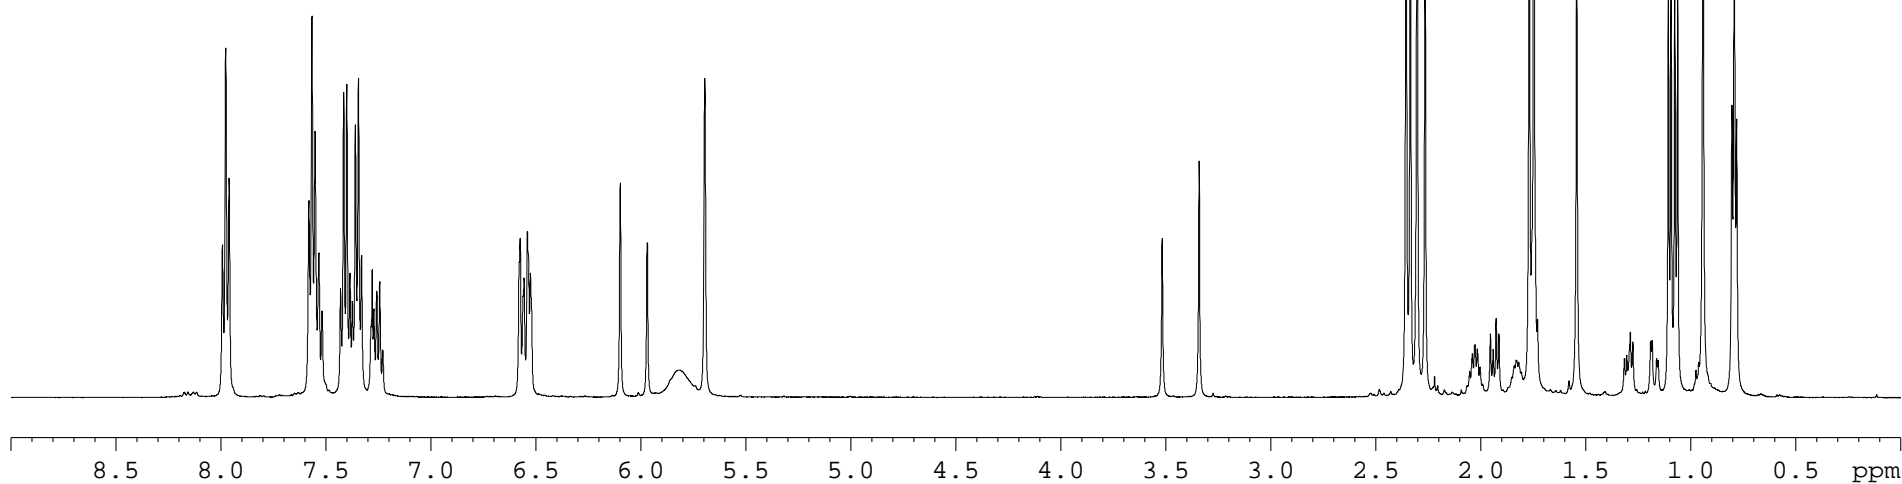

5.15  
8.23  
14.03  
5.18  
1.46  
1.10  
2.24  
2.61  
1.00  
1.44  
4.40  
3.40  
4.72  
3.24  
1.63  
1.70  
1.36  
9.63  
3.26  
1.55  
1.23  
9.20  
5.23  
6.60

167.56  
166.70  
154.86  
145.00  
144.88  
140.25  
140.00  
138.72  
138.27  
137.60  
137.32  
134.79  
133.38  
133.25  
132.78  
130.52  
130.28  
130.21  
130.13  
129.98  
128.60  
128.25  
128.00  
127.87  
127.77  
126.27  
126.21  
126.03  
125.96  
125.79  
115.16  
115.09  
112.54  
112.32

77.55  
77.23  
76.91

62.01  
60.58

53.45

46.67  
46.29  
45.60

27.29  
26.11  
25.91  
25.79  
25.45  
25.37  
25.11  
24.97  
23.90  
23.58  
18.79  
18.76

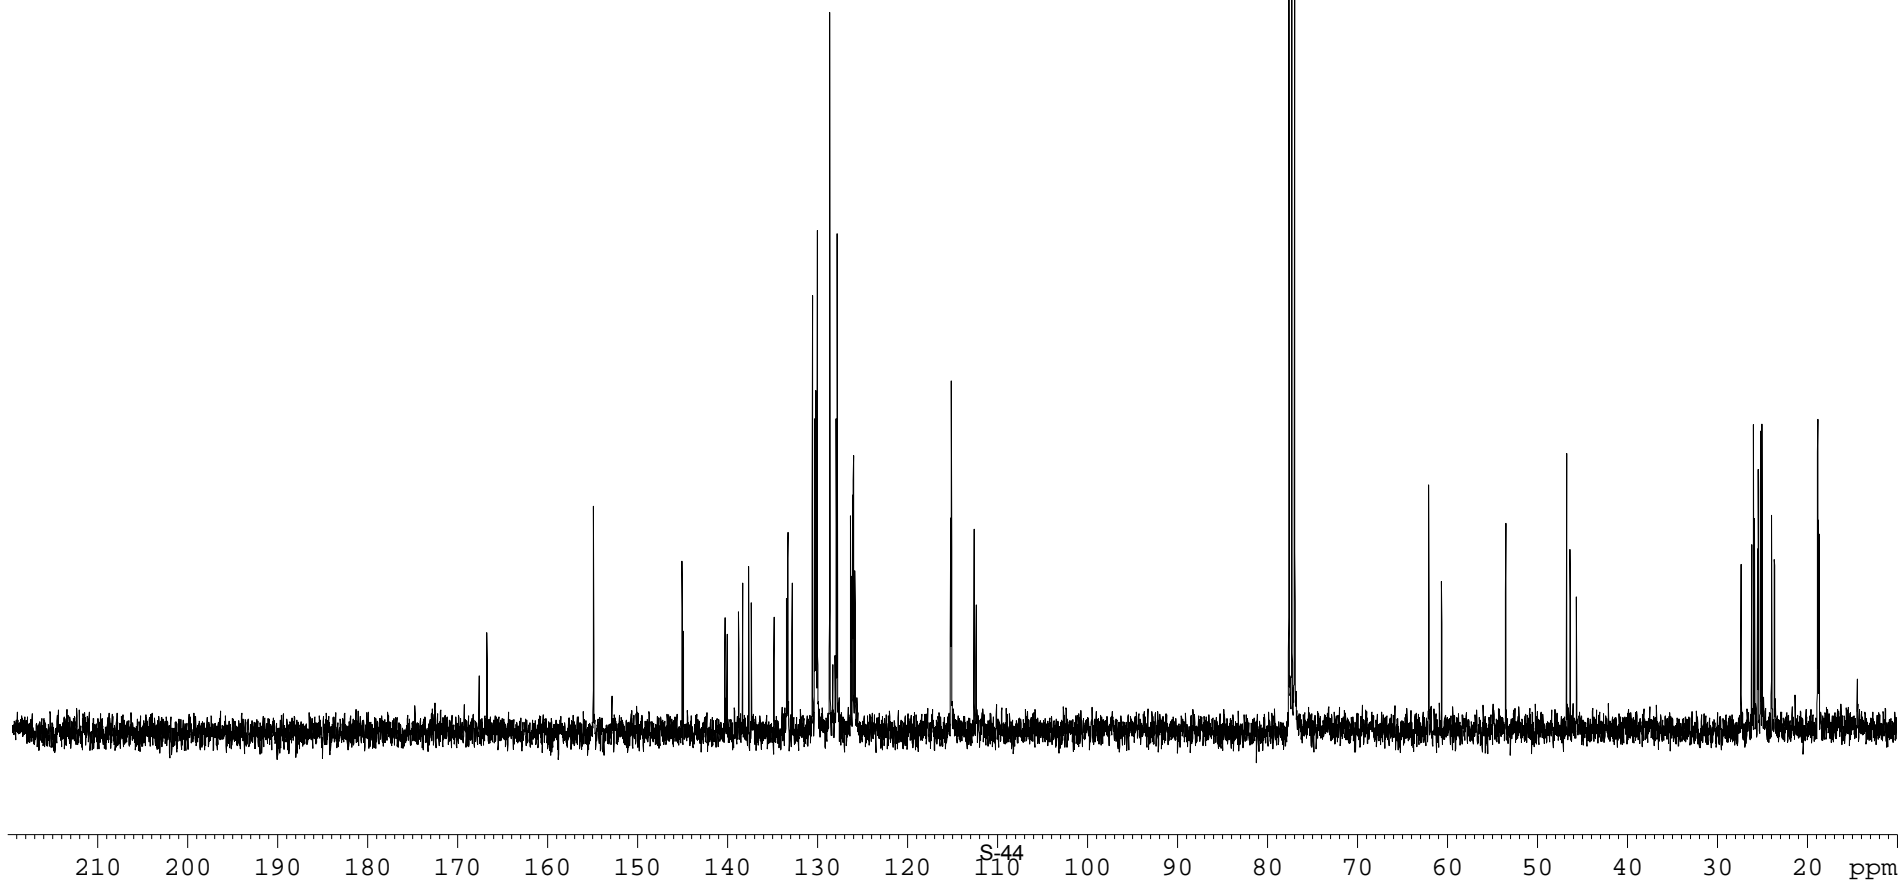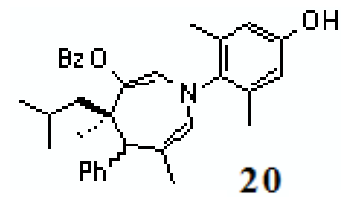



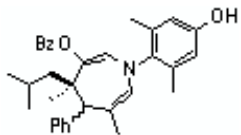

20

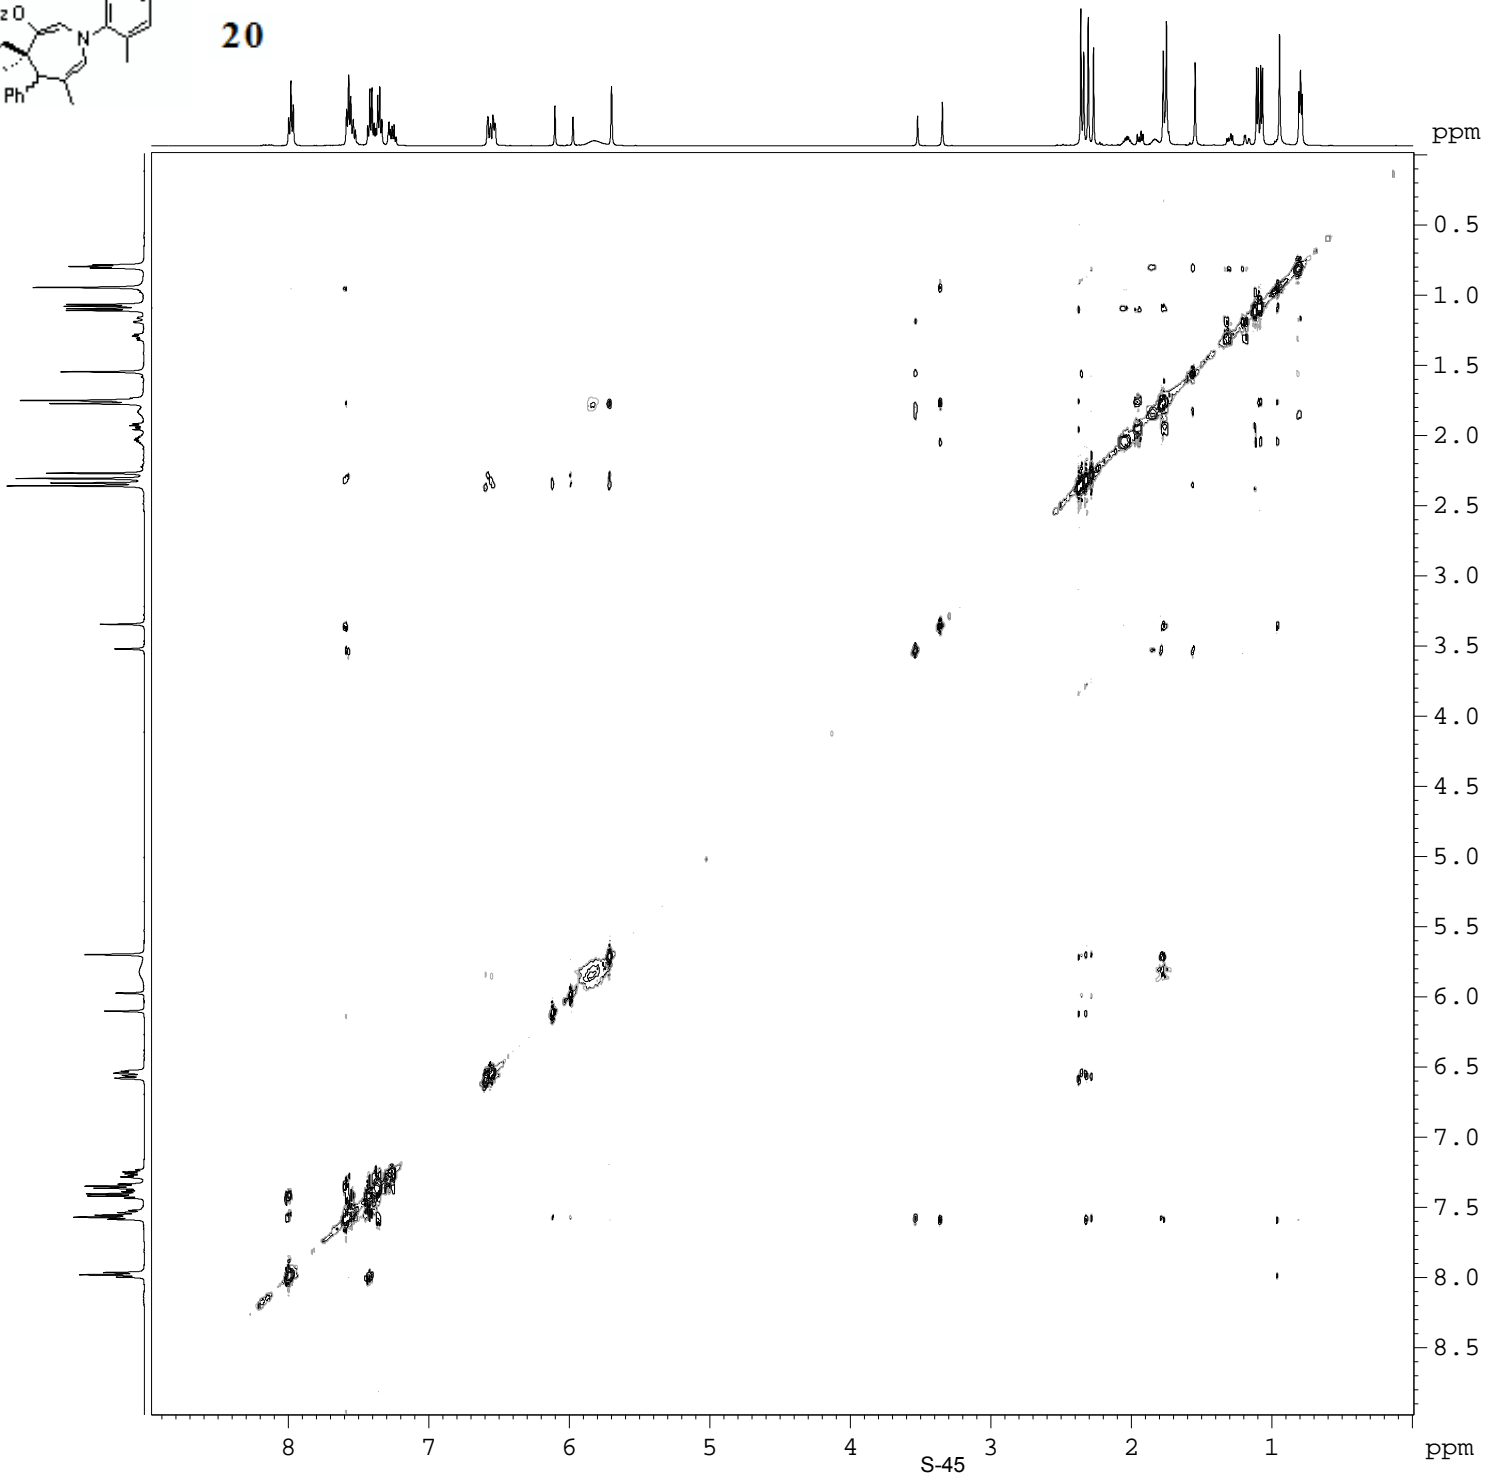

Current Data Parameters  
 NAME 09-076-noesy  
 EXPNO 11  
 PROCNO 1  
 DU /u  
 USER nshapiro

F2 - Acquisition Parameters  
 Date\_ 20080507  
 Time 19.05  
 INSTRUM AV-500  
 PROBHD 5 mm TBI 1H/31  
 PULPROG noesygpph  
 TD 4096  
 SOLVENT CDCl3  
 NS 2  
 DS 4  
 SWH 4496.403 Hz  
 FIDRES 1.097755 Hz  
 AQ 0.4556364 sec  
 RG 88  
 DW 111.200 use  
 DE 7.11 use  
 TE 300.0 K  
 d0 0.00010139 sec  
 D1 5.00000000 sec  
 D8 0.52999997 sec  
 D16 0.00010000 sec  
 IN0 0.00022213 sec  
 MCREST 0.00000000 sec  
 MCWRK 5.00000000 sec  
 TAU 0.26389998 sec

==== CHANNEL f1 =====  
 NUC1 1H  
 P1 7.60 use  
 P2 15.20 use  
 PL1 0.00 dB  
 SFO1 500.2322510 MHz

==== GRADIENT CHANNEL ===  
 GPNAM1 SINE.100  
 GPNAM2 SINE.100  
 GPX1 0.00 %  
 GPX2 0.00 %  
 GPY1 0.00 %  
 GPY2 0.00 %  
 GPZ1 40.00 %  
 GPZ2 -40.00 %  
 P16 1000.00 use

F1 - Acquisition parameters  
 ND0 1  
 TD 128  
 SFO1 500.2323 MHz  
 FIDRES 35.171638 Hz  
 SW 9.000 ppm  
 FnmODE TPPI

F2 - Processing parameters  
 SI 2048  
 SF 500.2300104 MHz  
 WDW QSINE  
 SSB 2  
 LB 0.00 Hz  
 GB 0  
 PC 4.00

F1 - Processing parameters  
 SI 2048  
 MC2 TPPI  
 SF 500.2300104 MHz  
 WDW QSINE  
 SSB 2  
 LB 0.00 Hz  
 GB 0

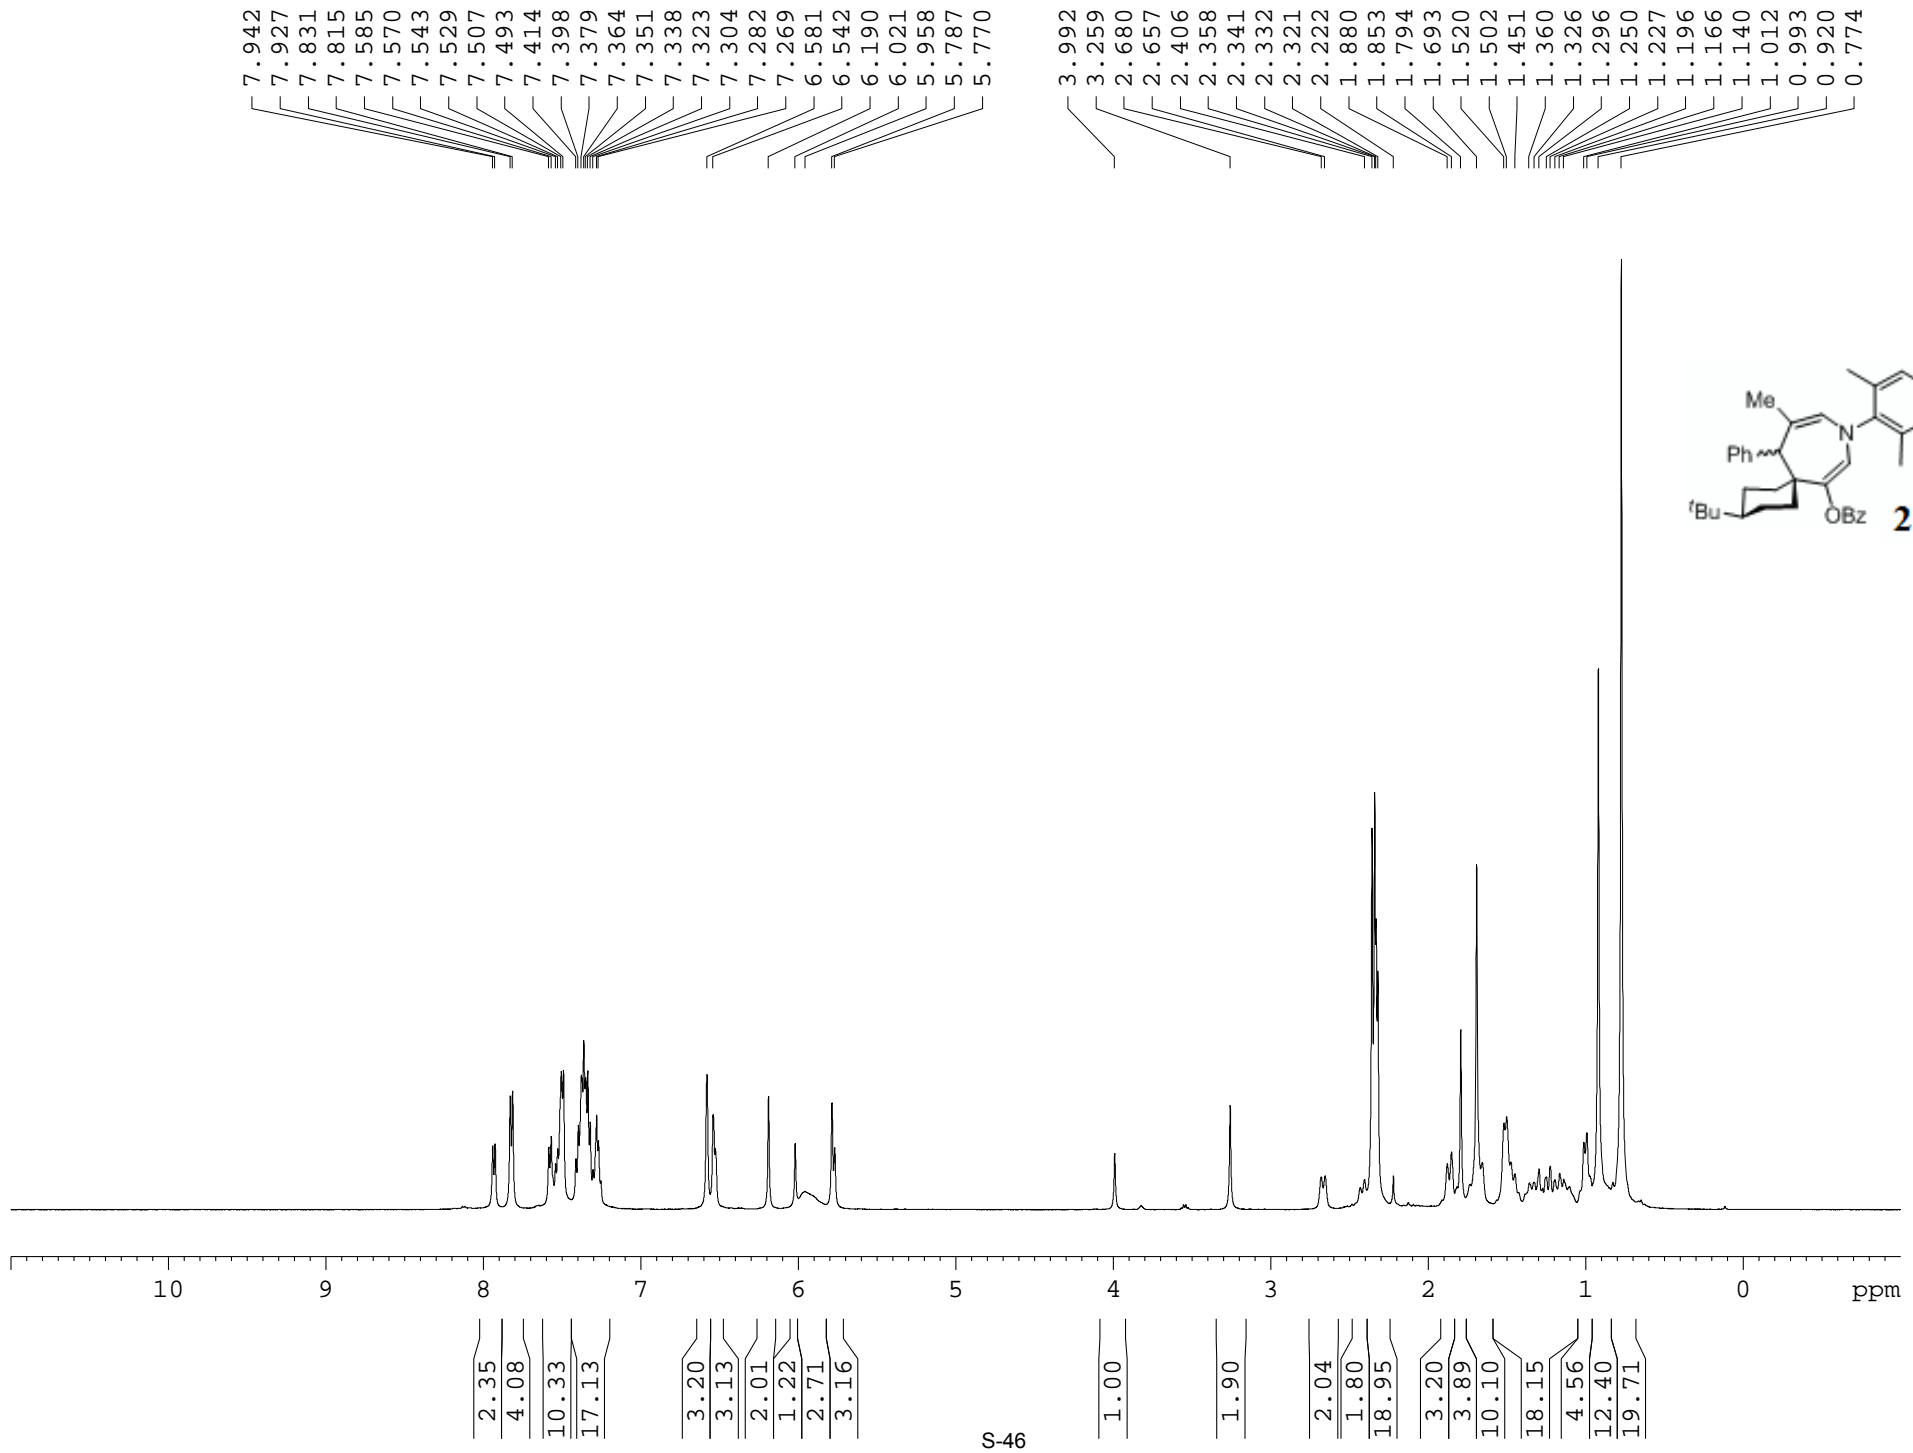

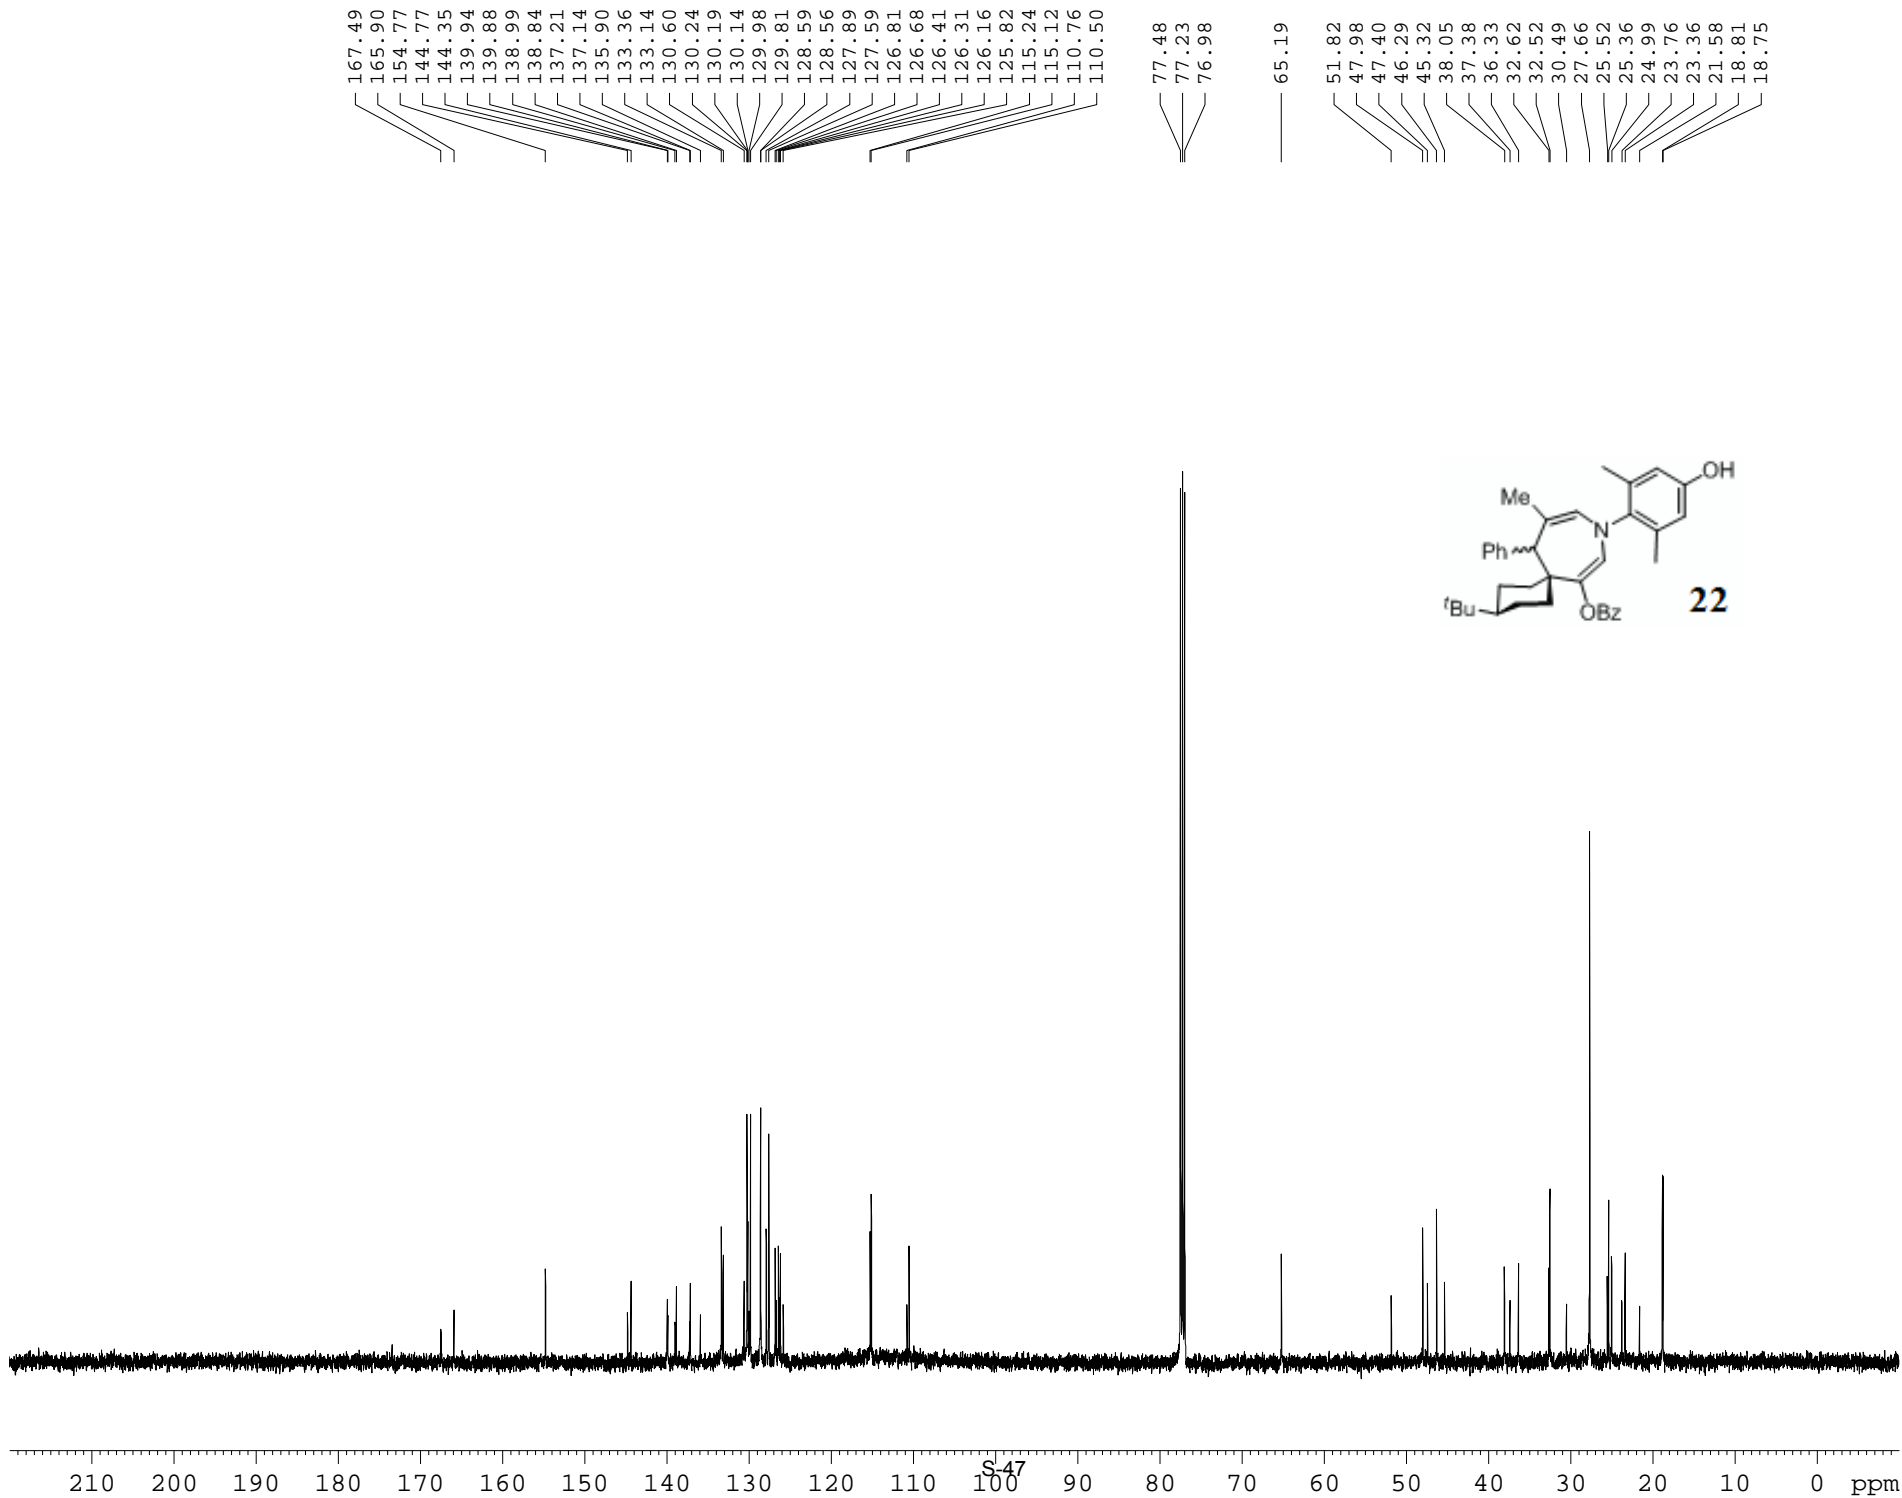

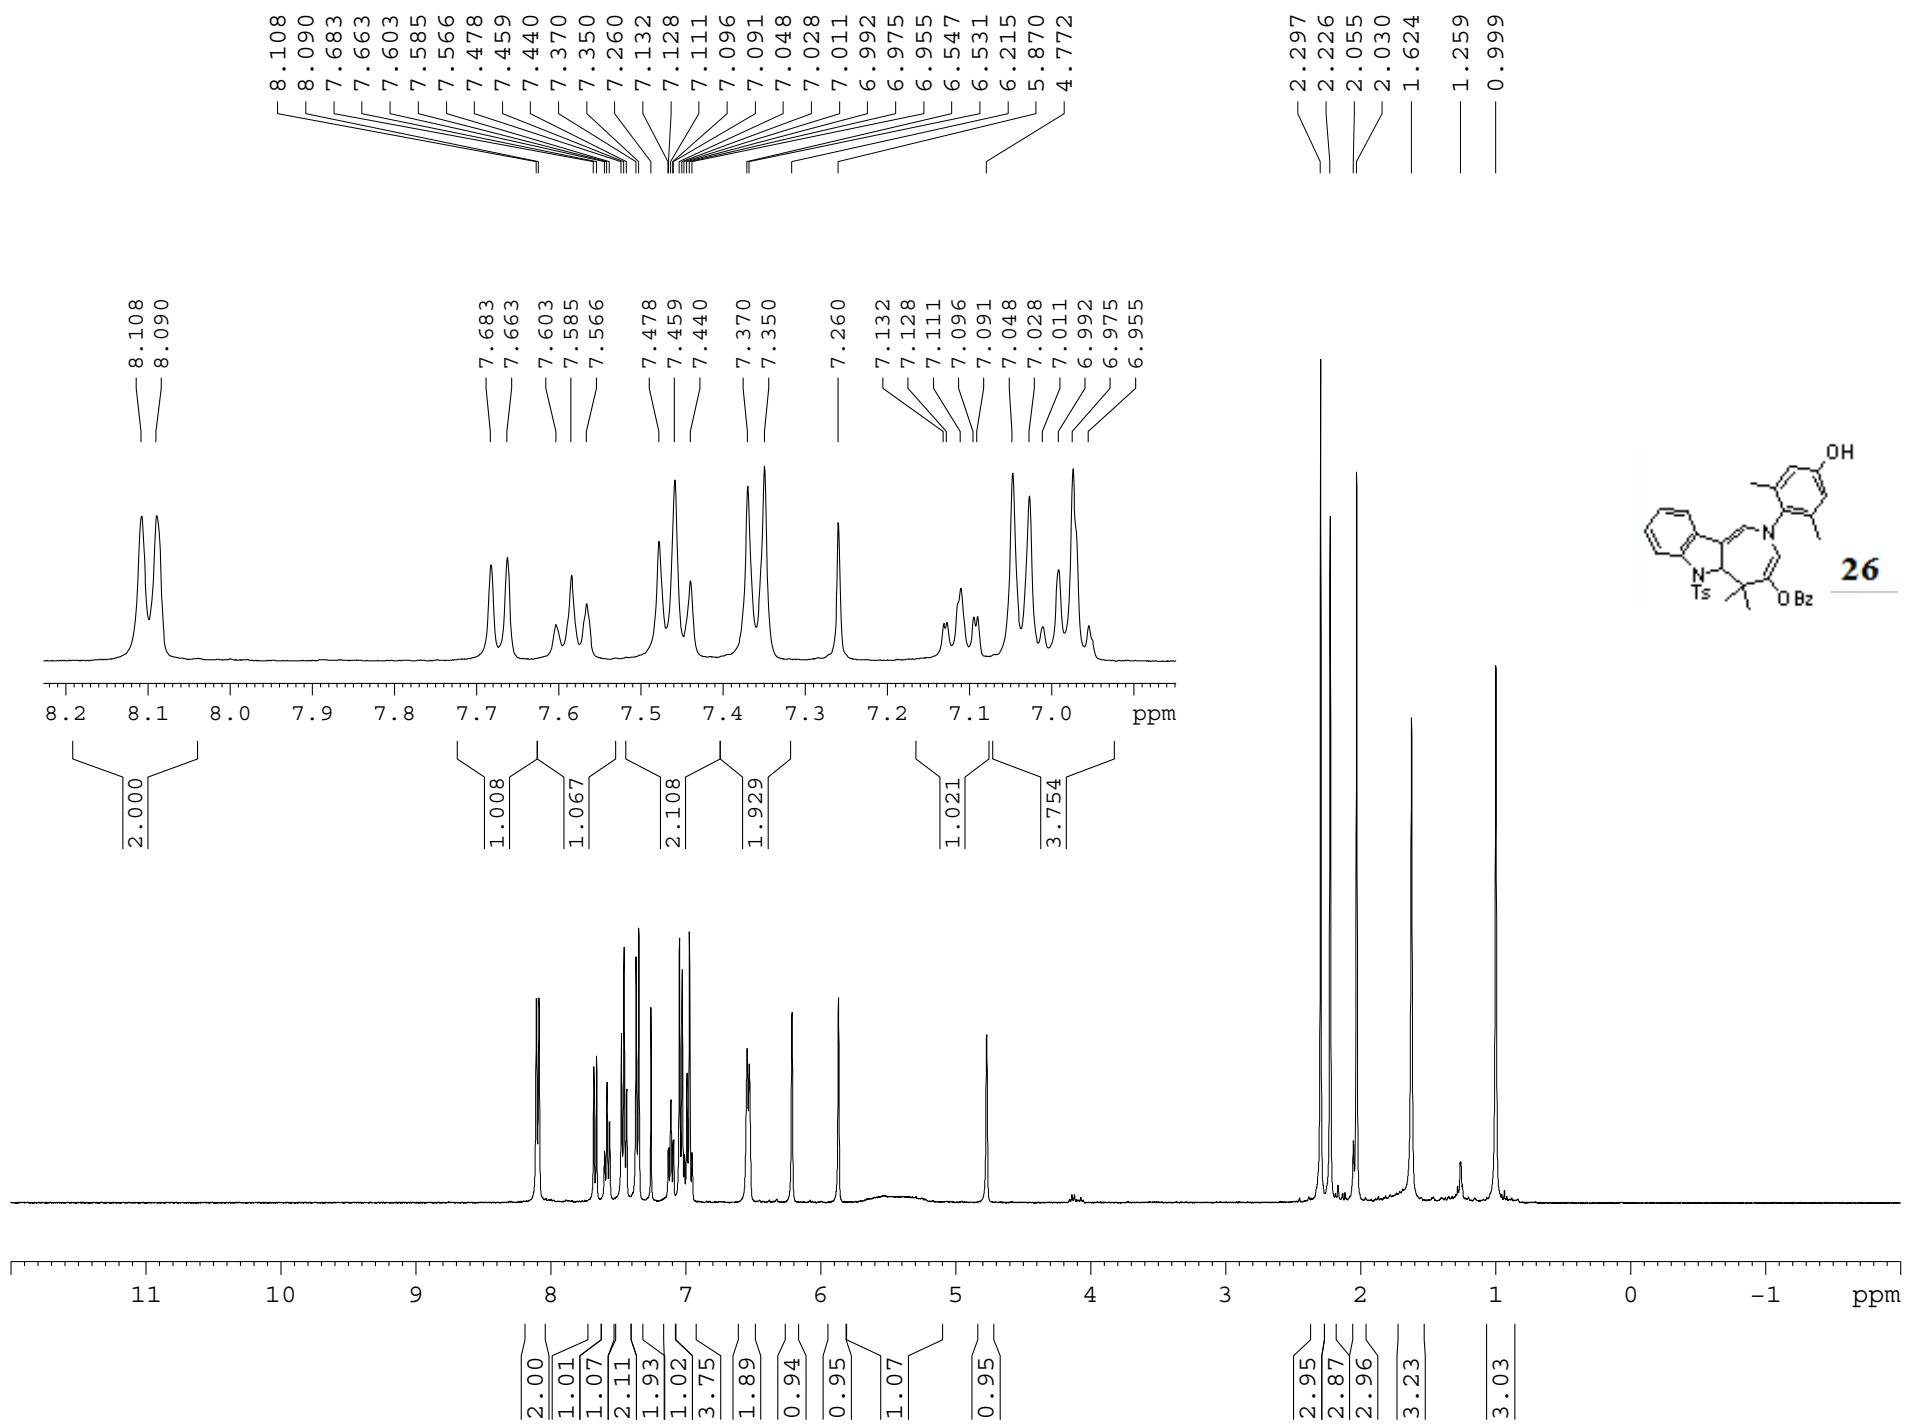

167.17  
155.13  
143.76  
142.03  
138.24  
137.84  
137.14  
134.30  
133.62  
133.41  
133.20  
130.02  
129.69  
129.10  
128.57  
127.85  
126.34  
125.79  
125.73  
122.52  
119.54  
117.84  
115.21  
114.88  
114.77

77.39  
77.08  
76.76  
71.07

60.60

47.92

24.30  
23.32  
21.55  
21.12  
17.96  
17.61  
14.22

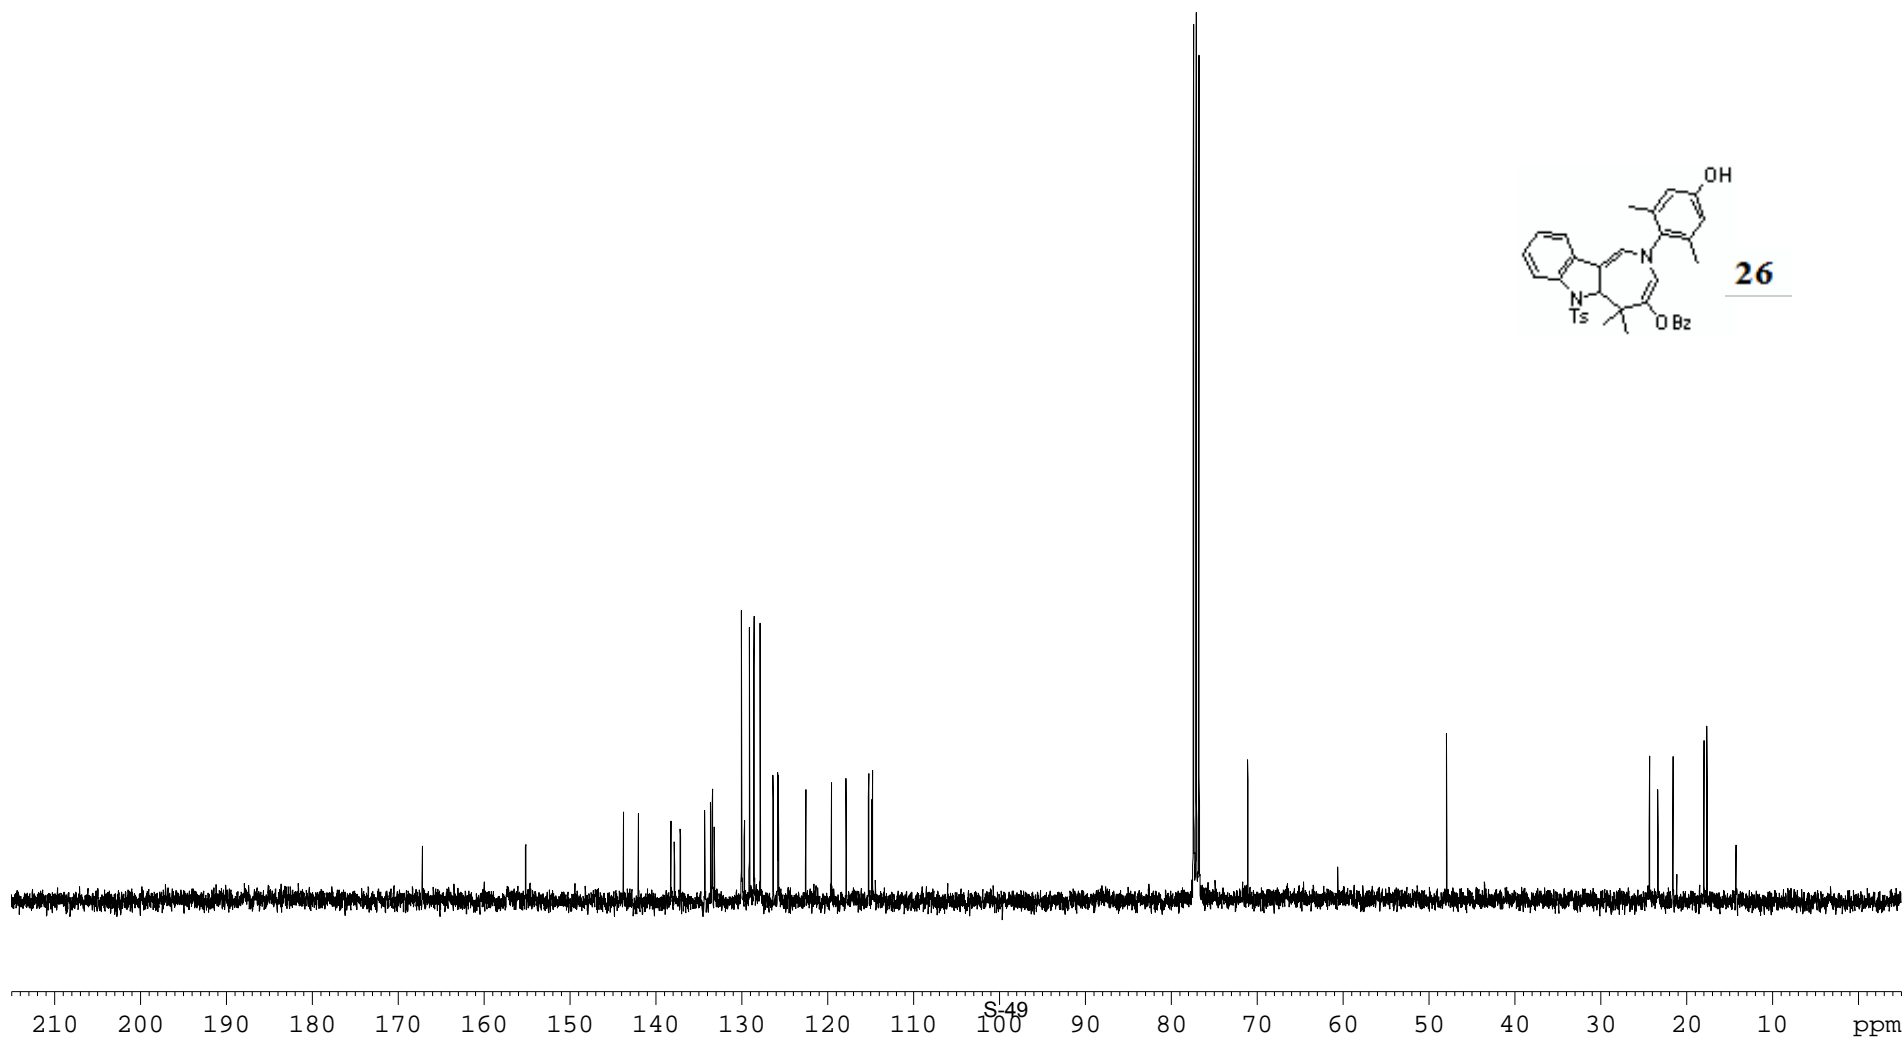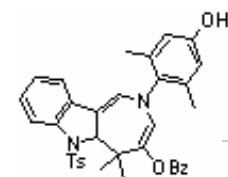

26

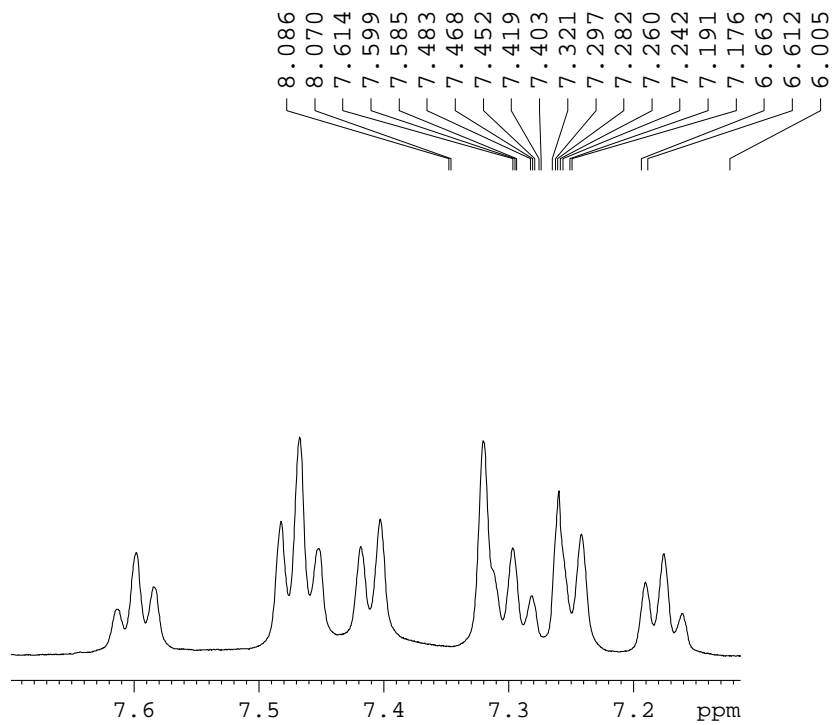

3.932

2.330  
2.215

1.268  
1.188  
1.066  
0.886

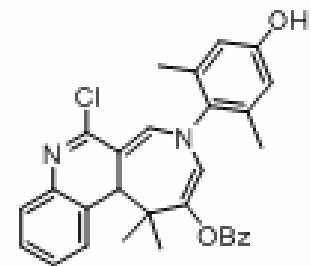

**28**

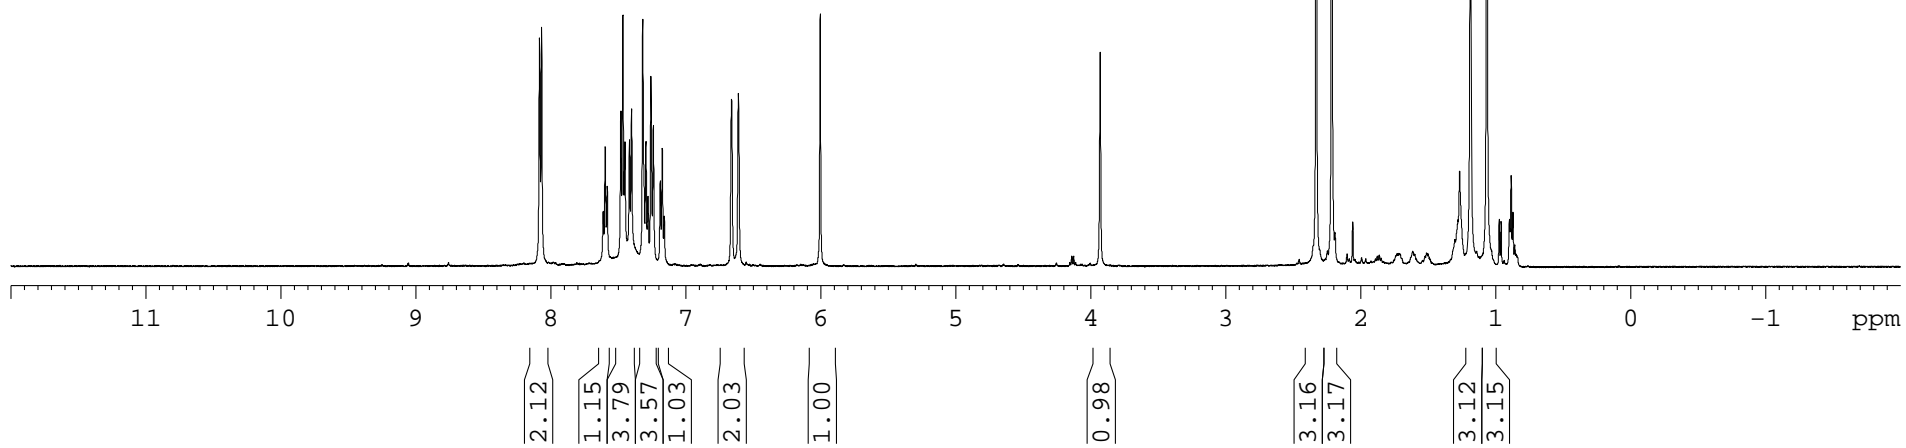

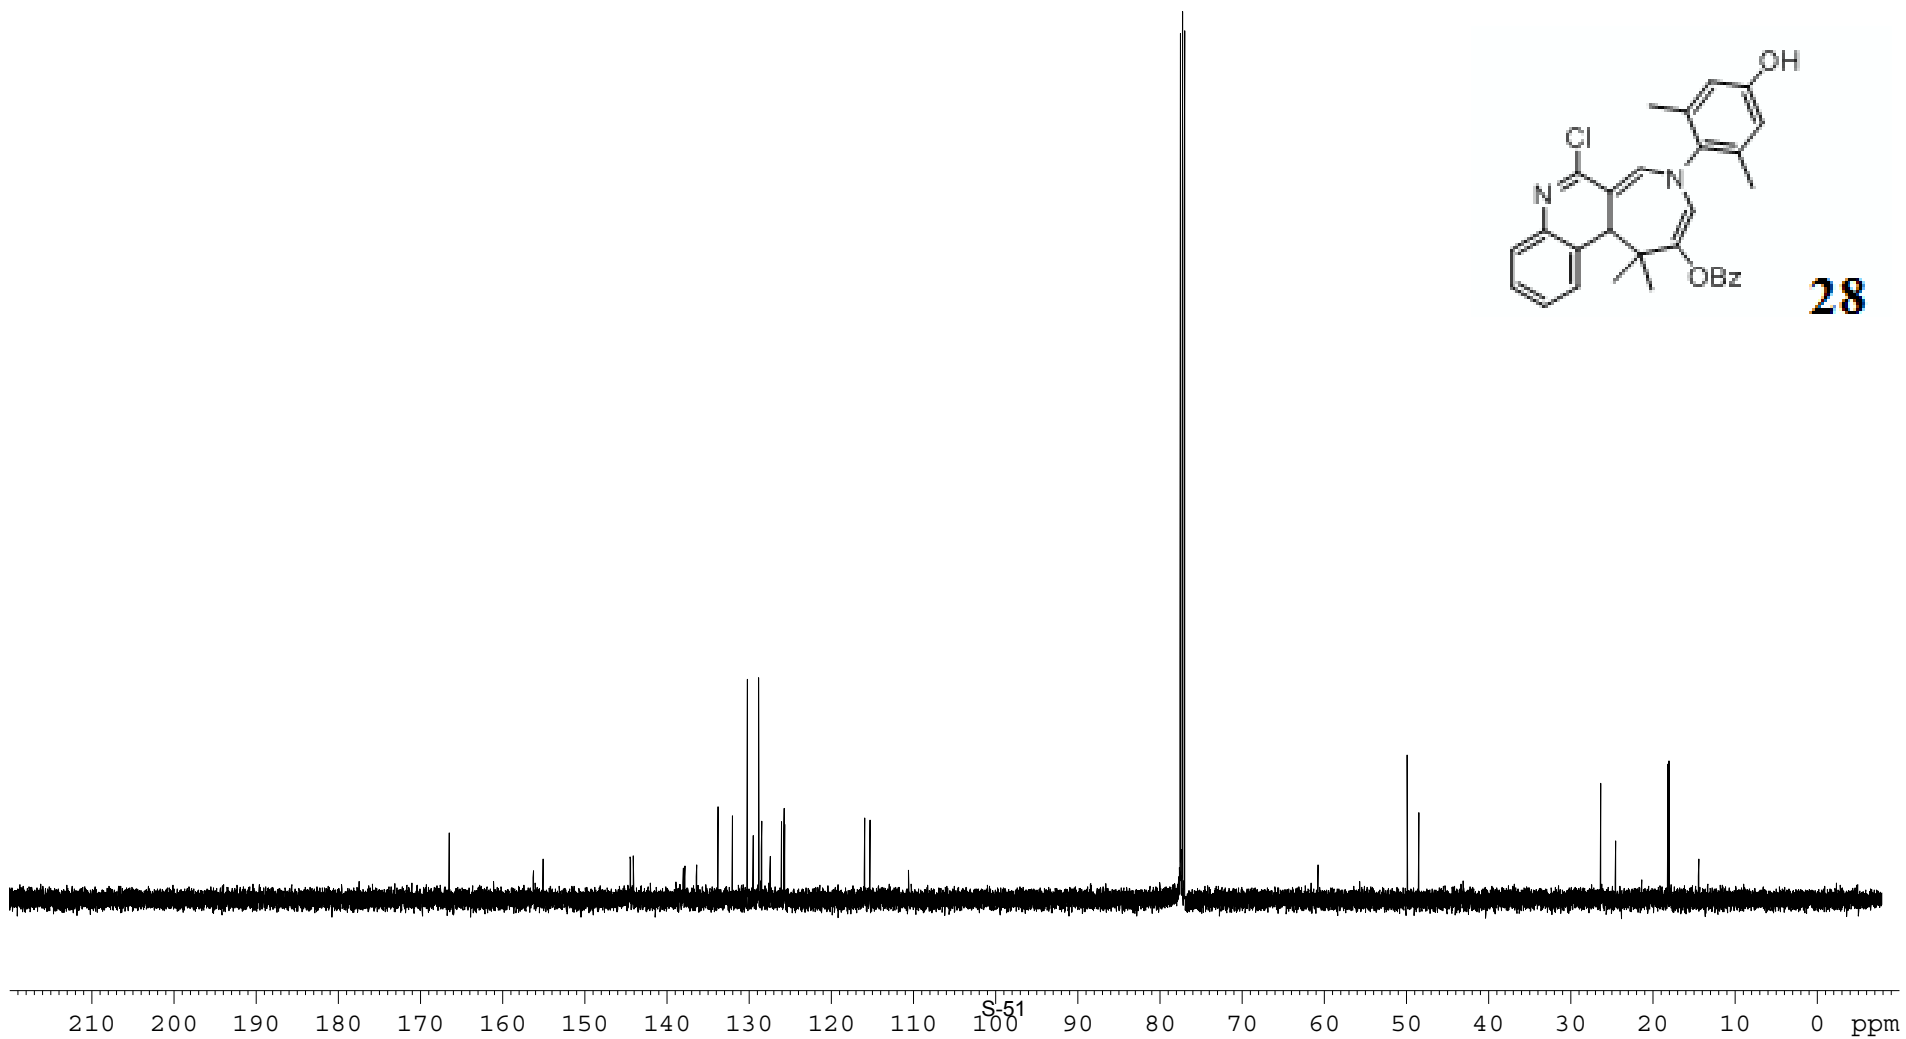

**28**

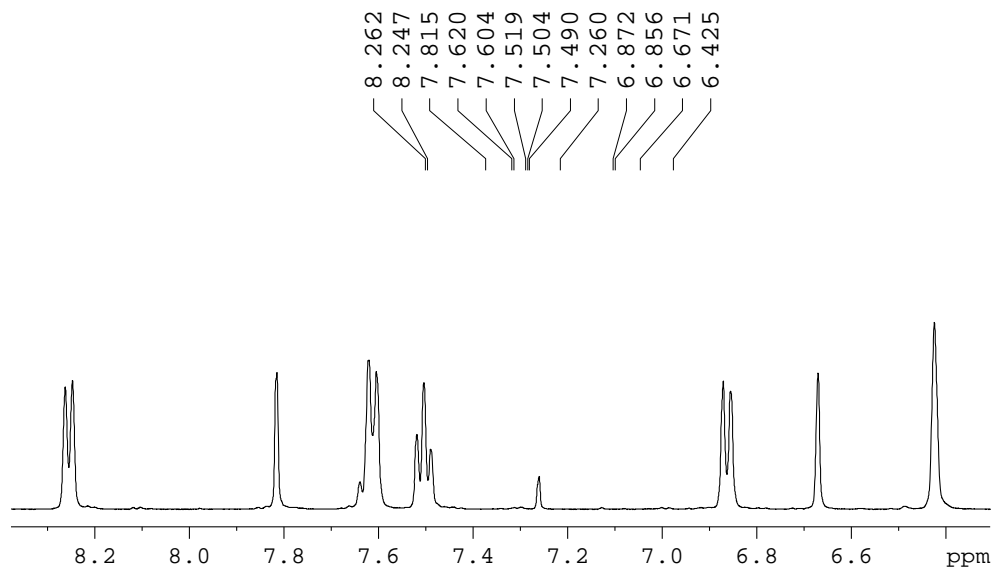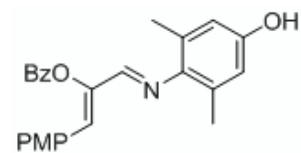

**29**

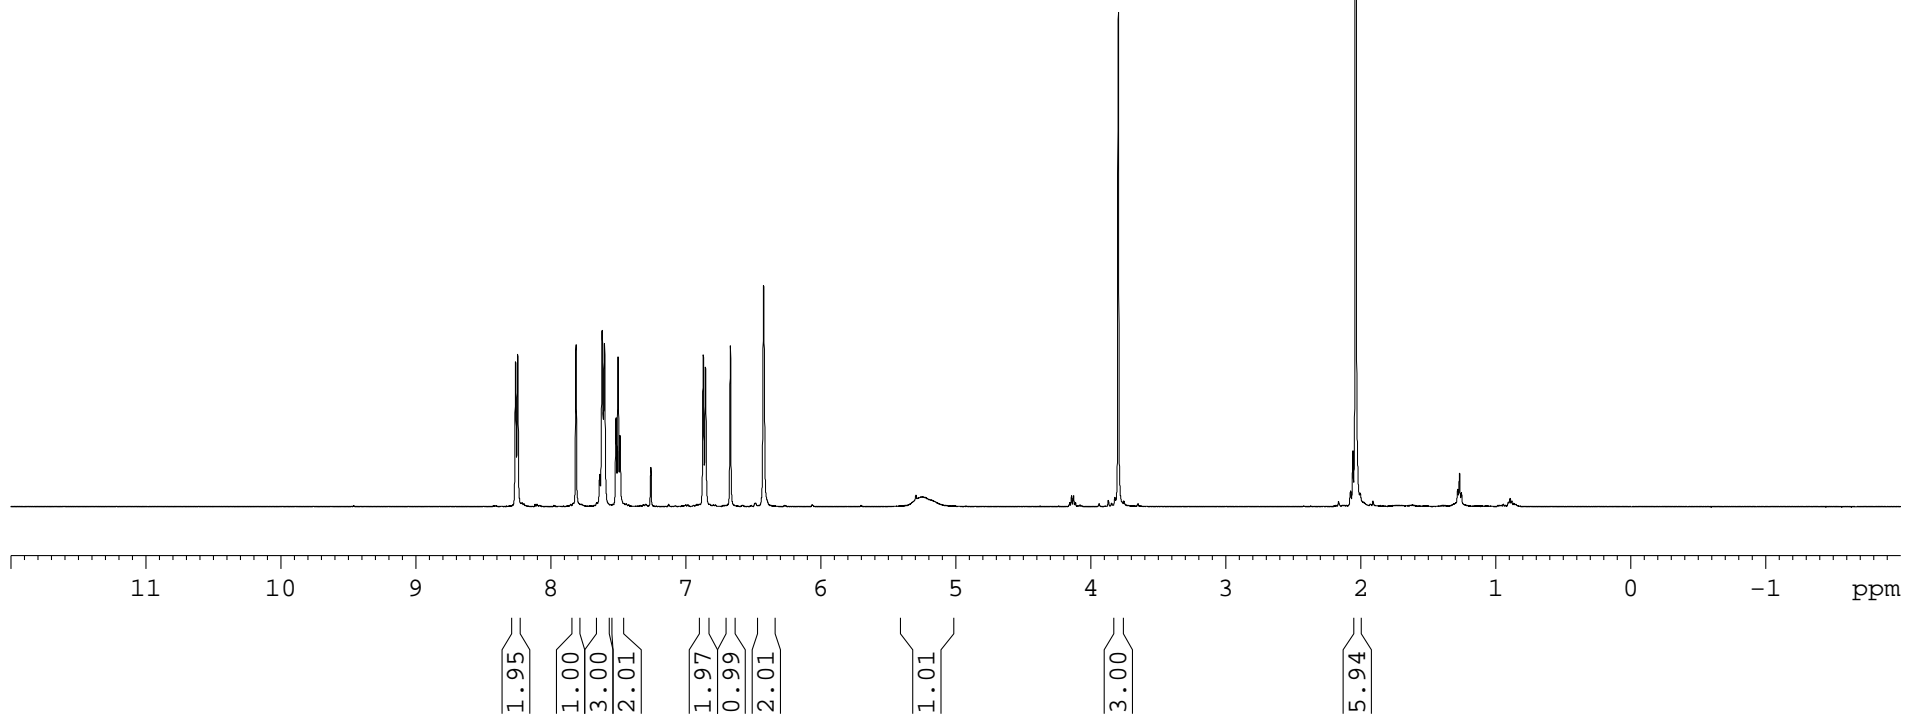



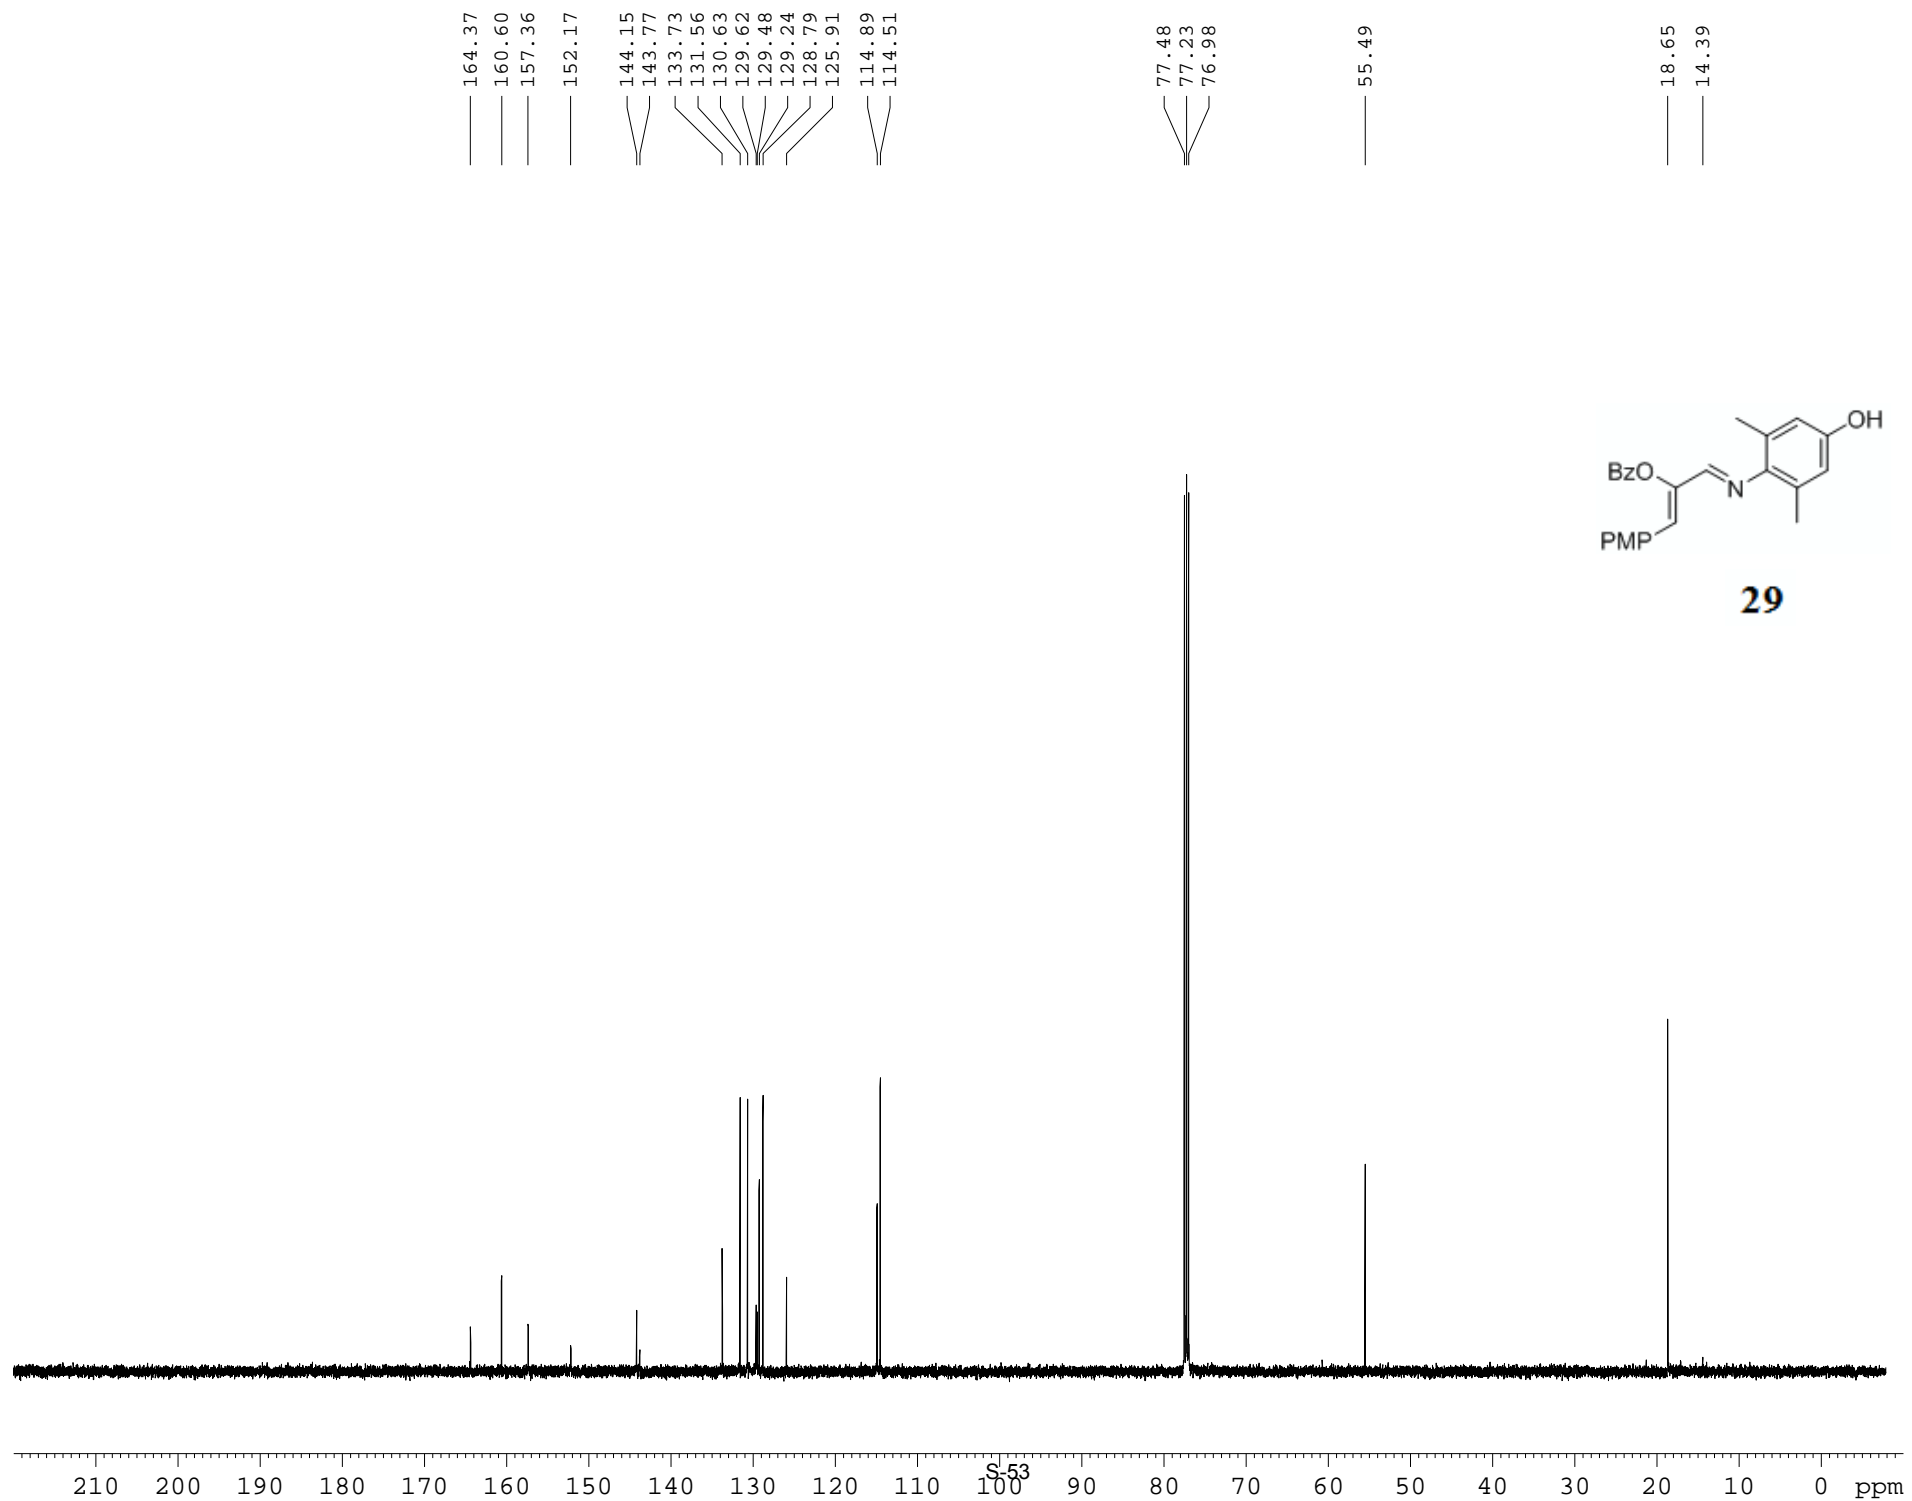

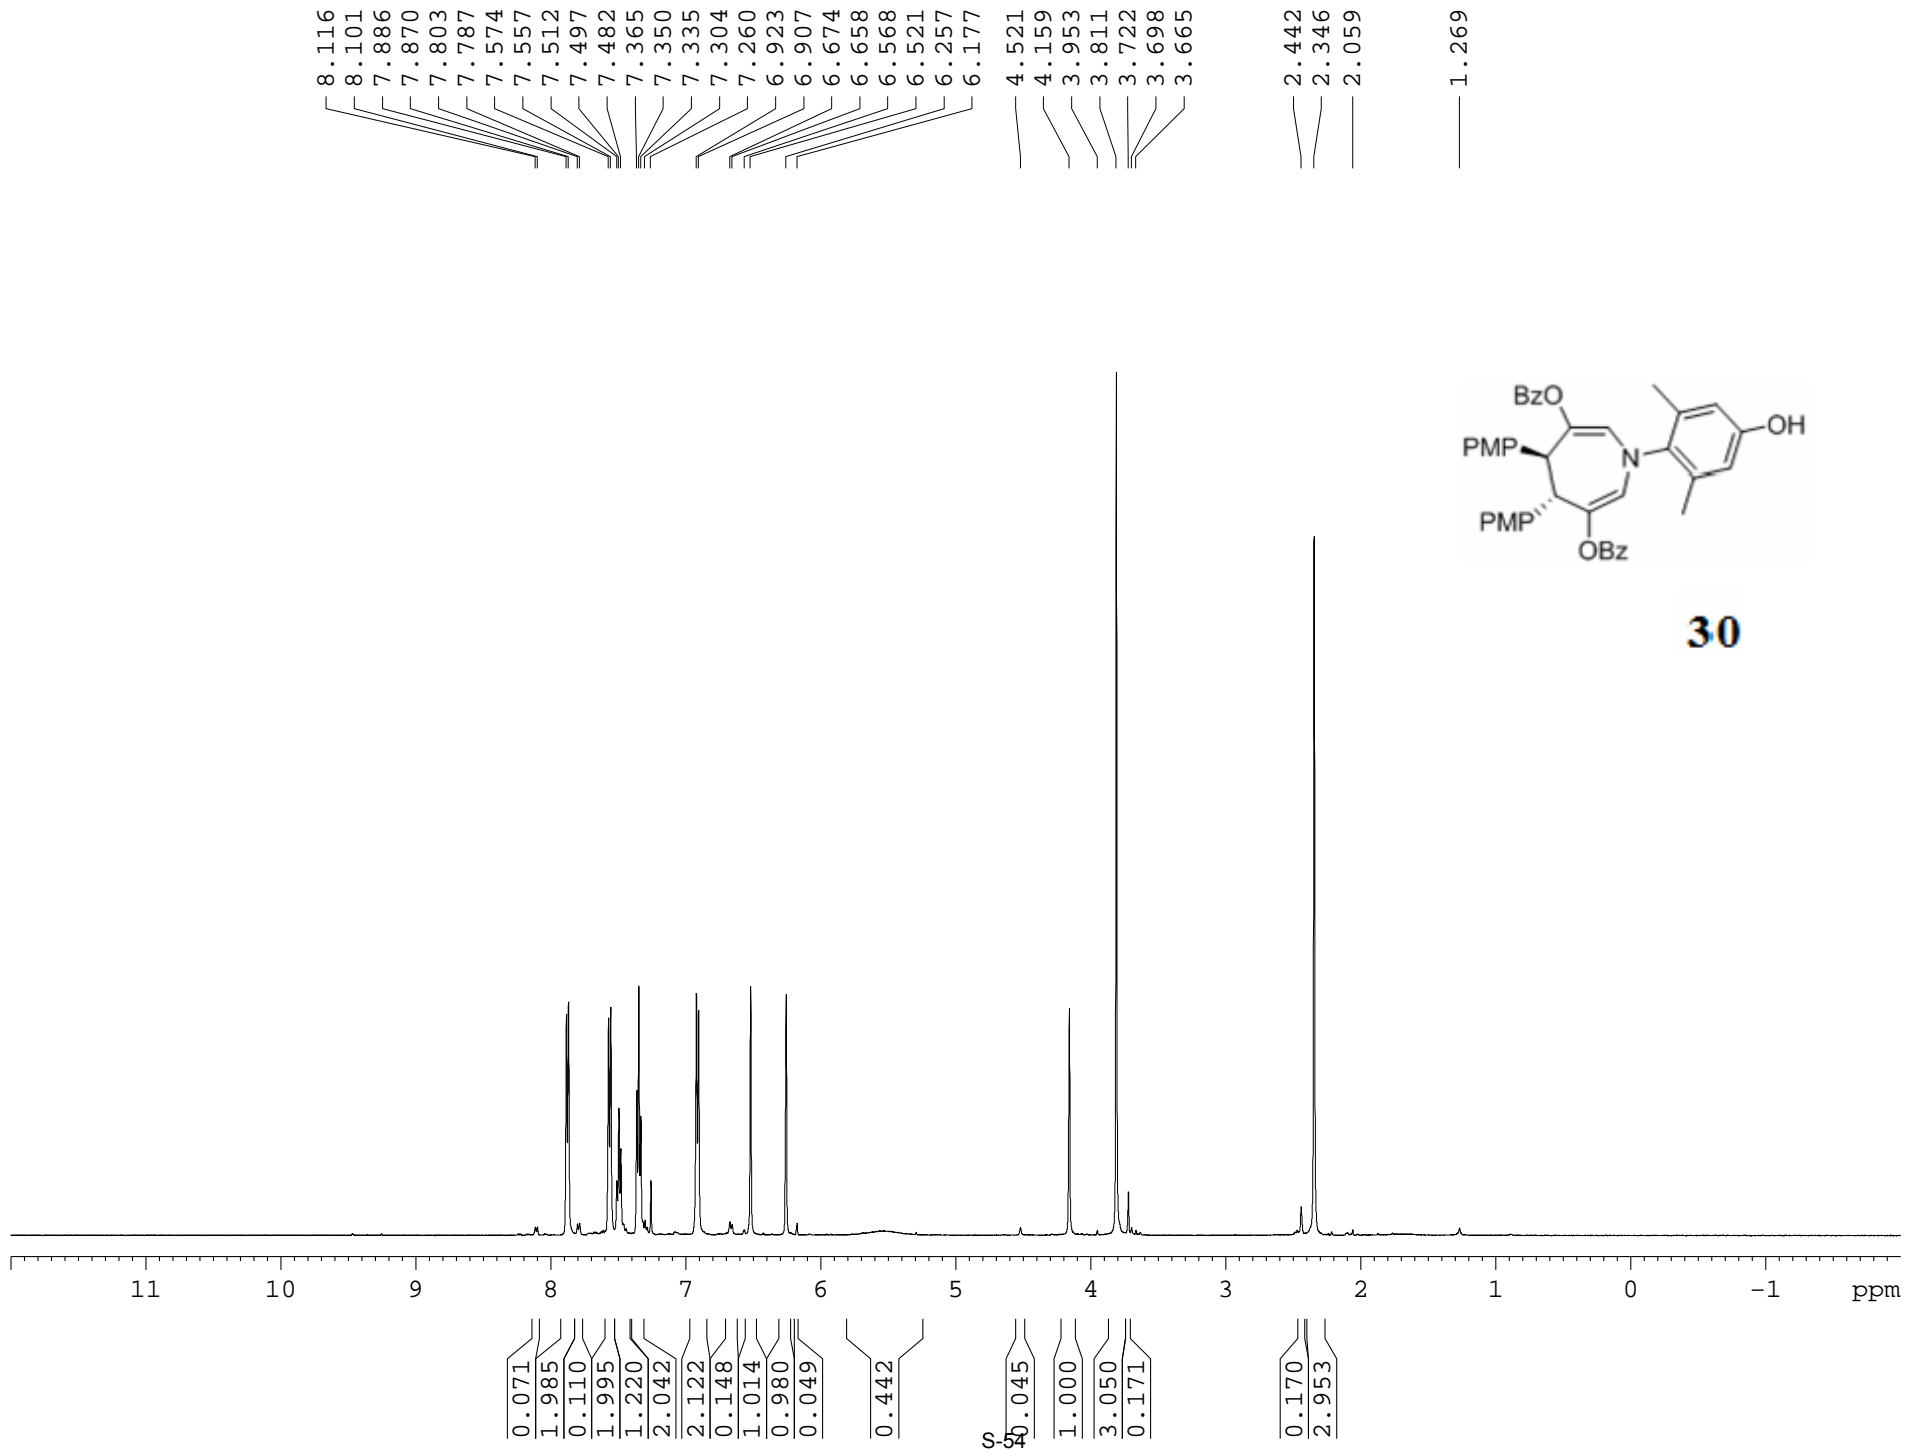

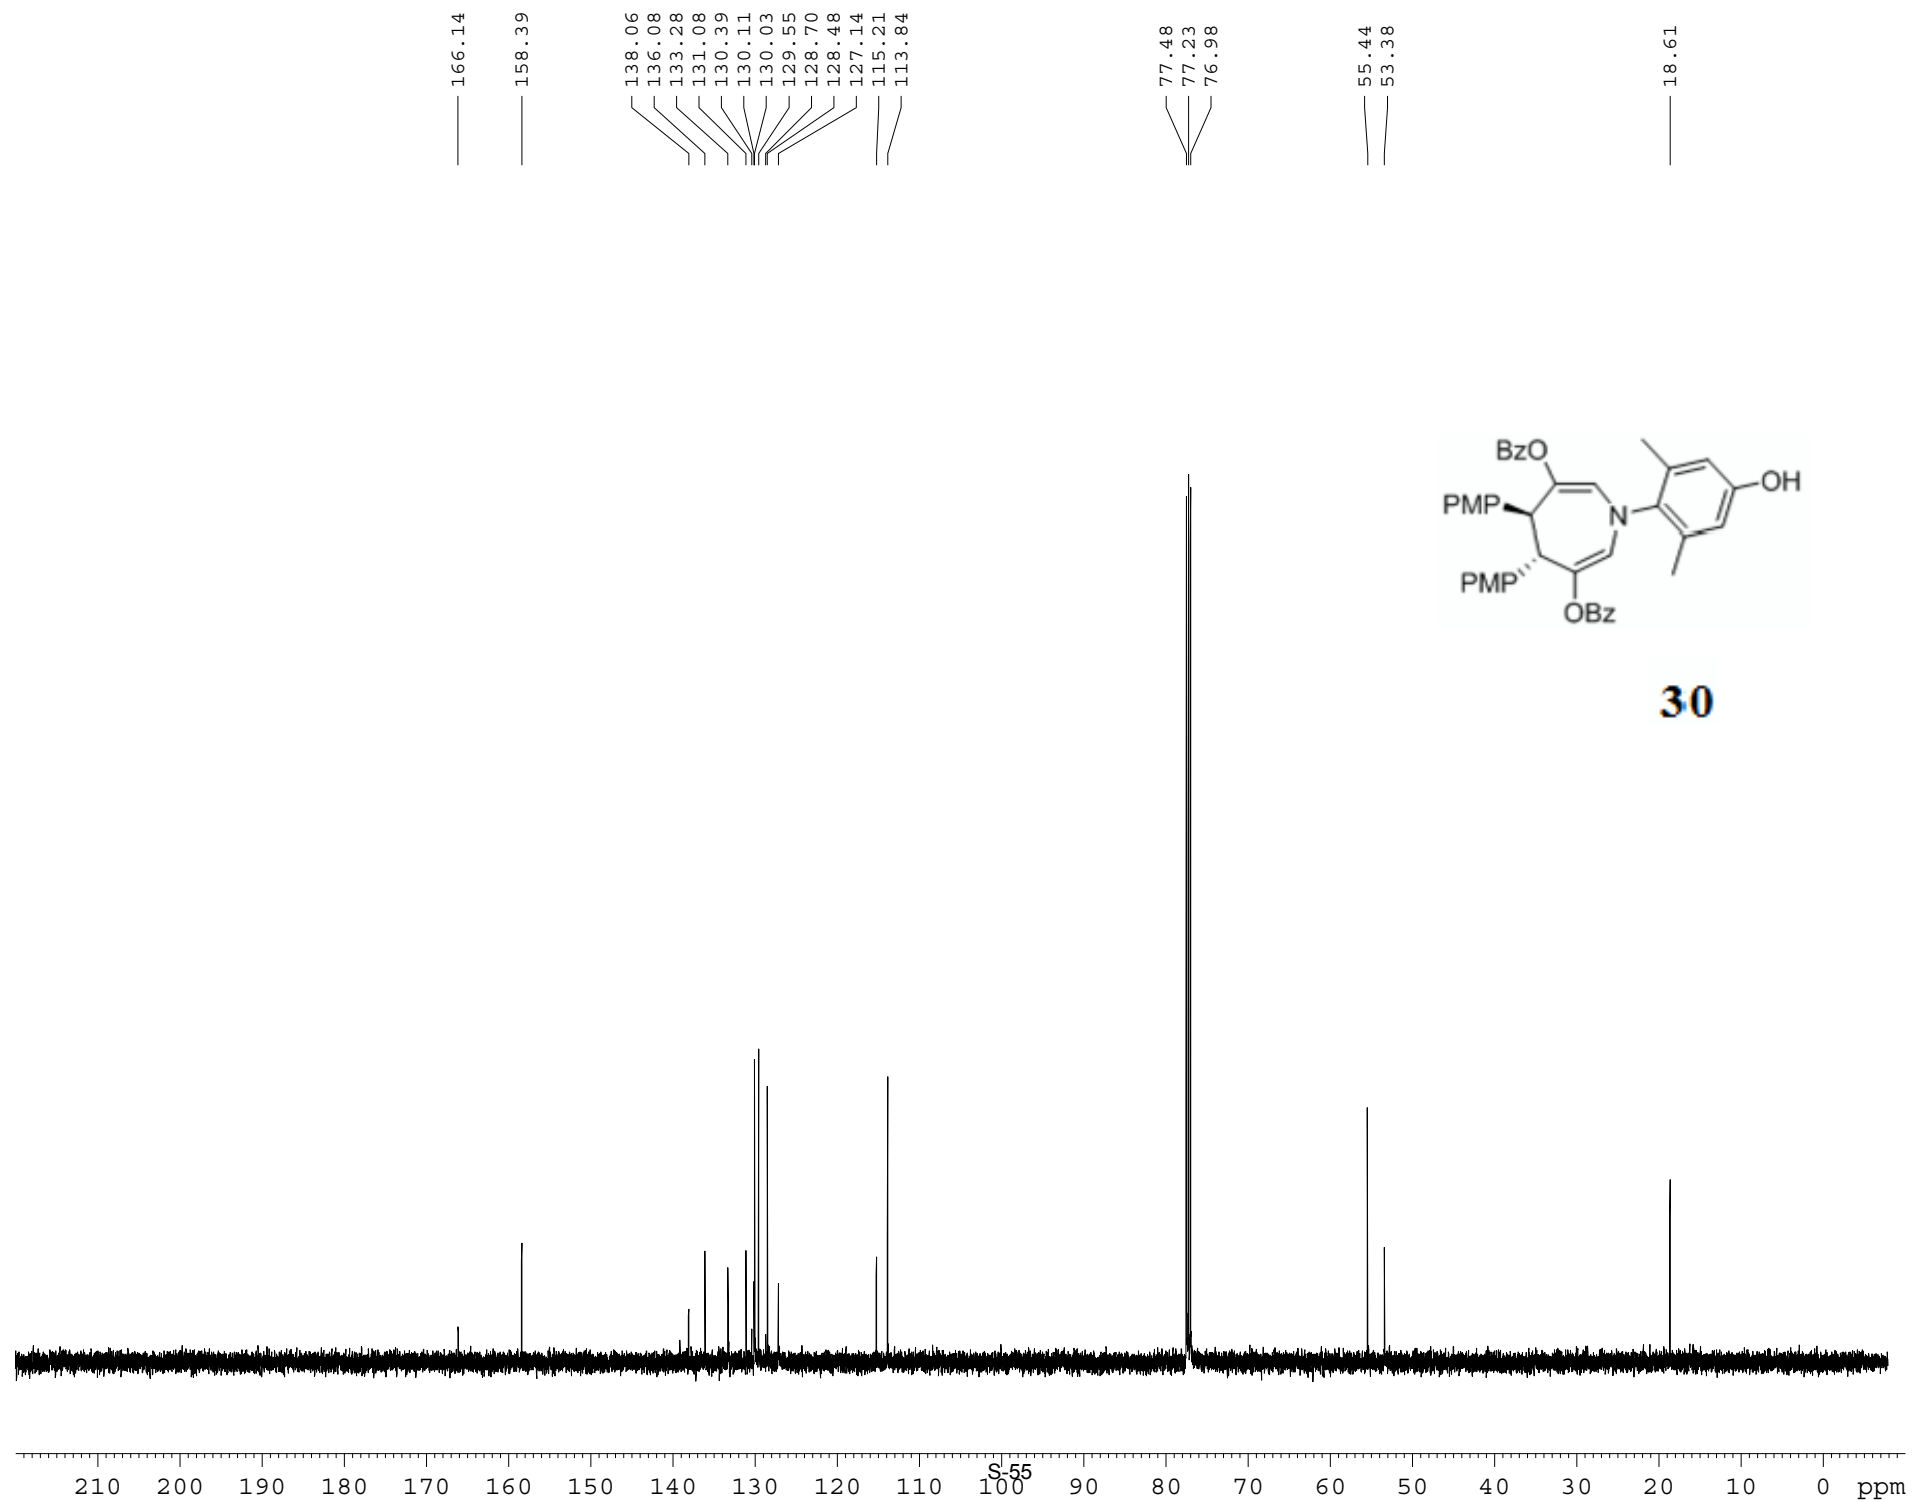

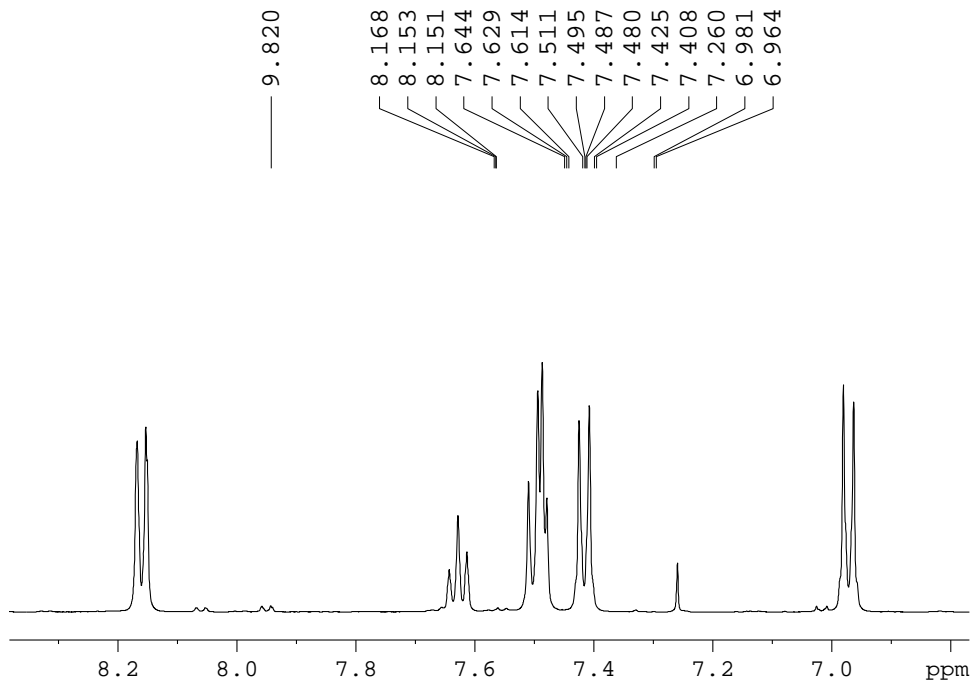

3.865

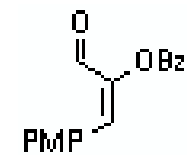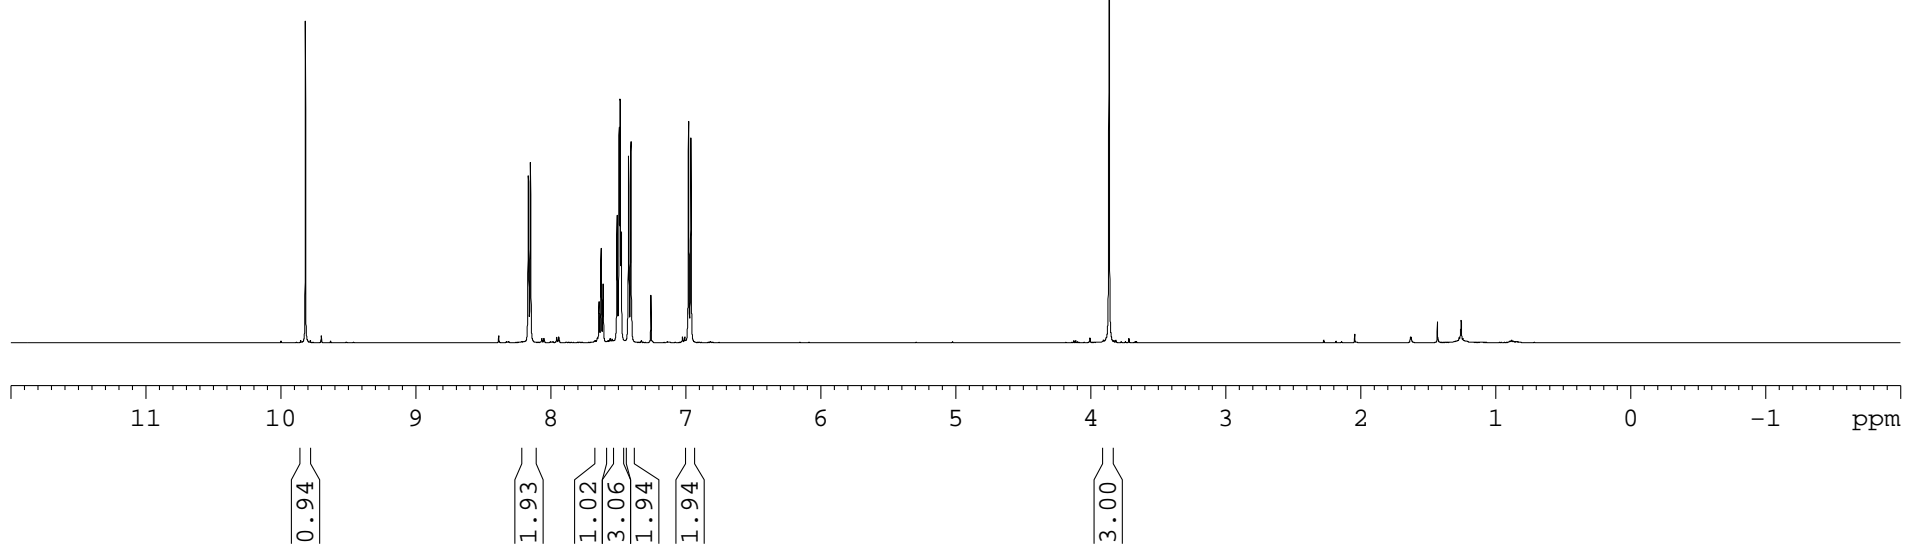

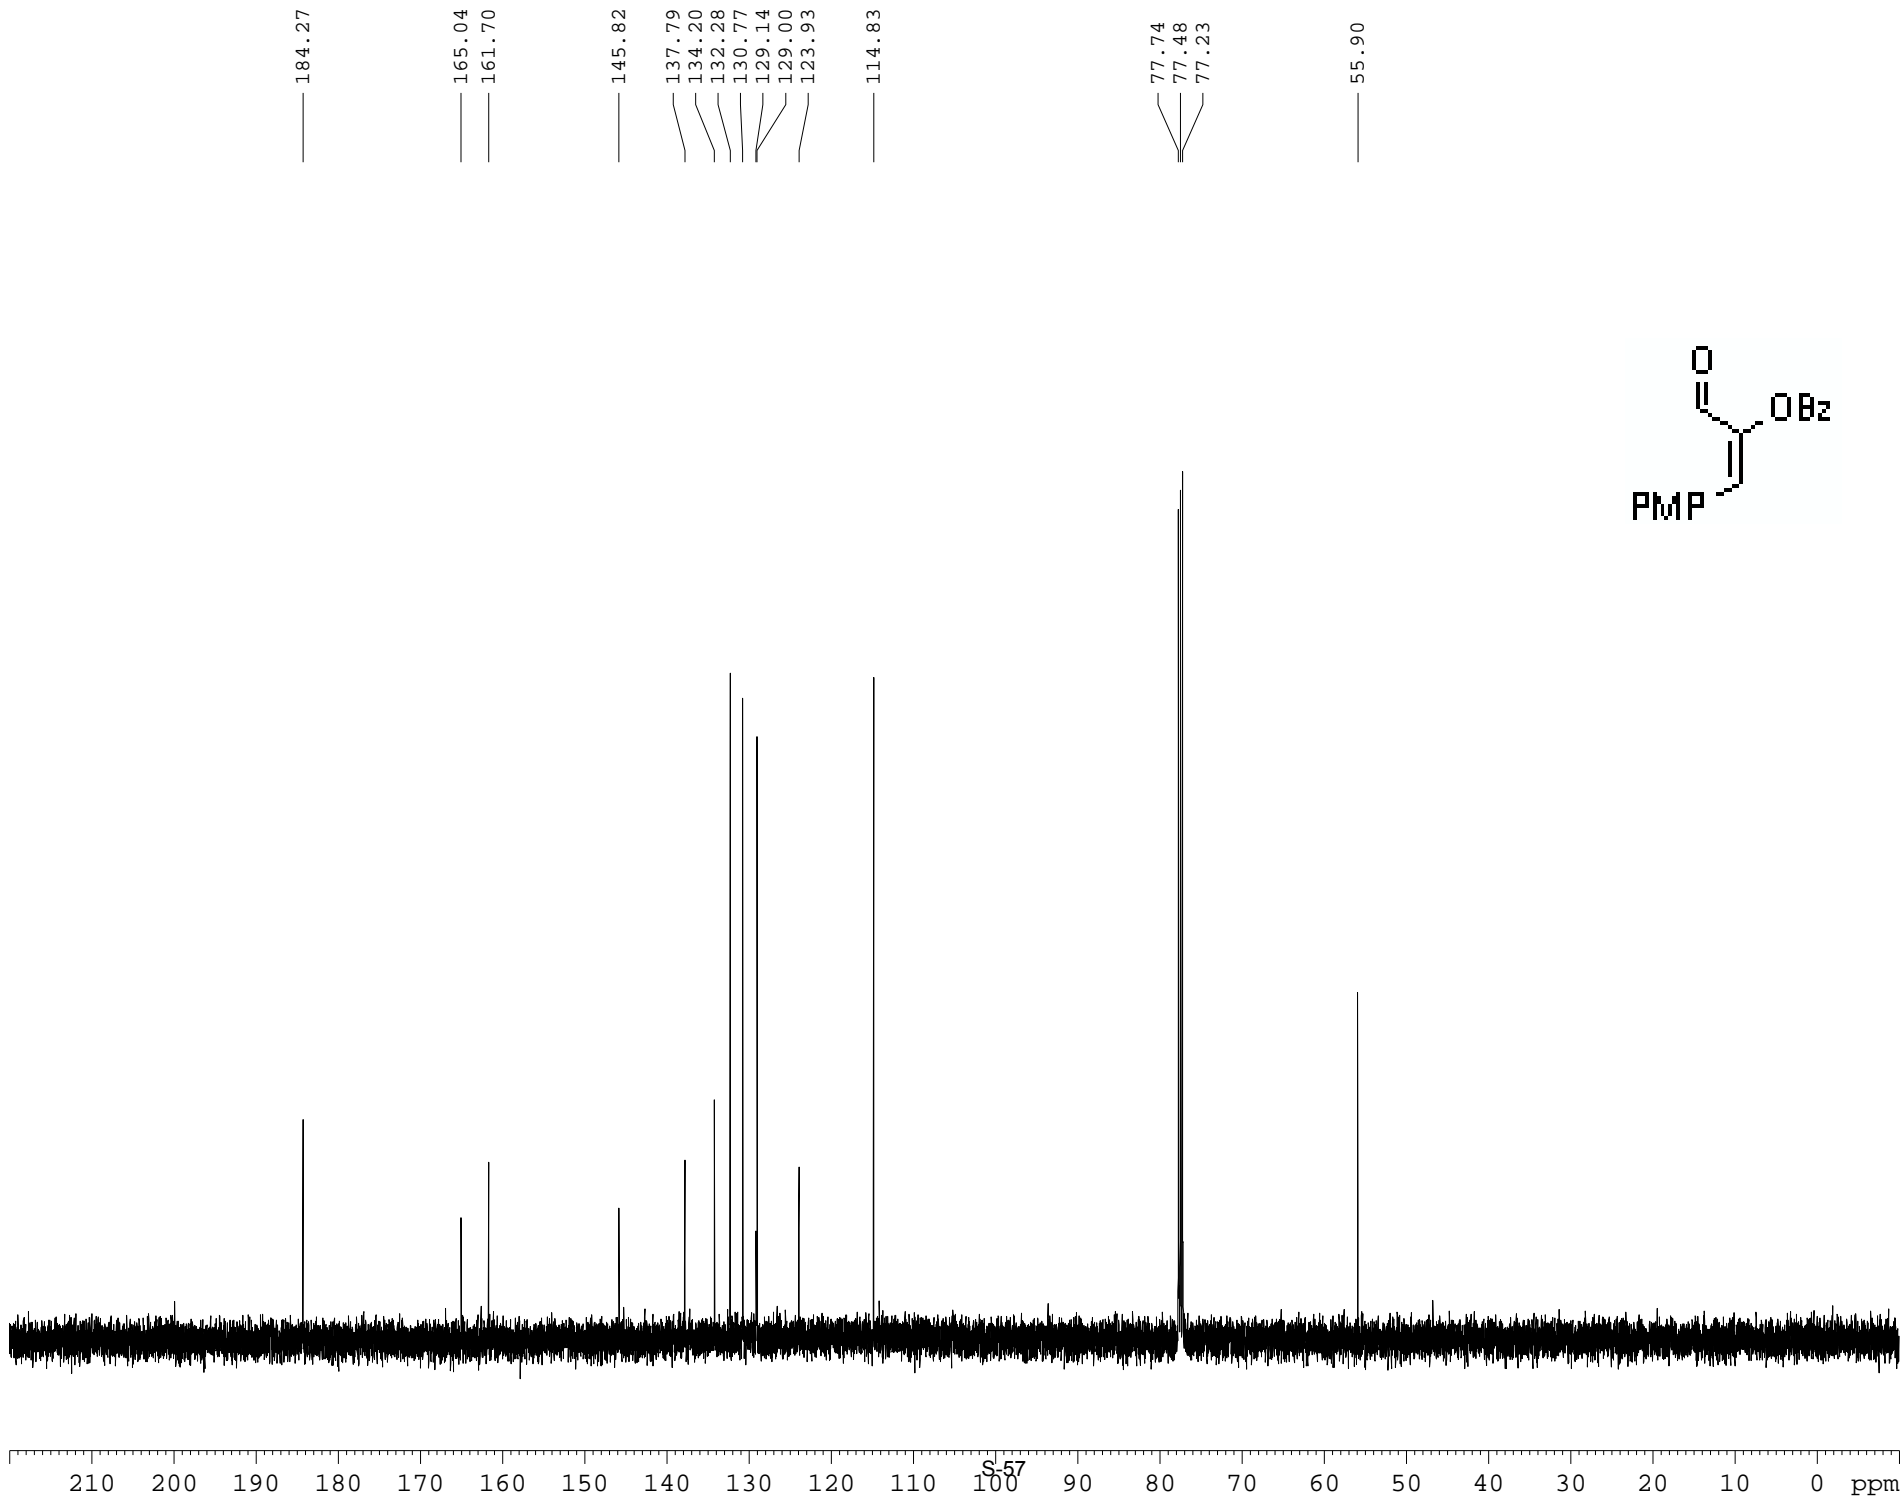

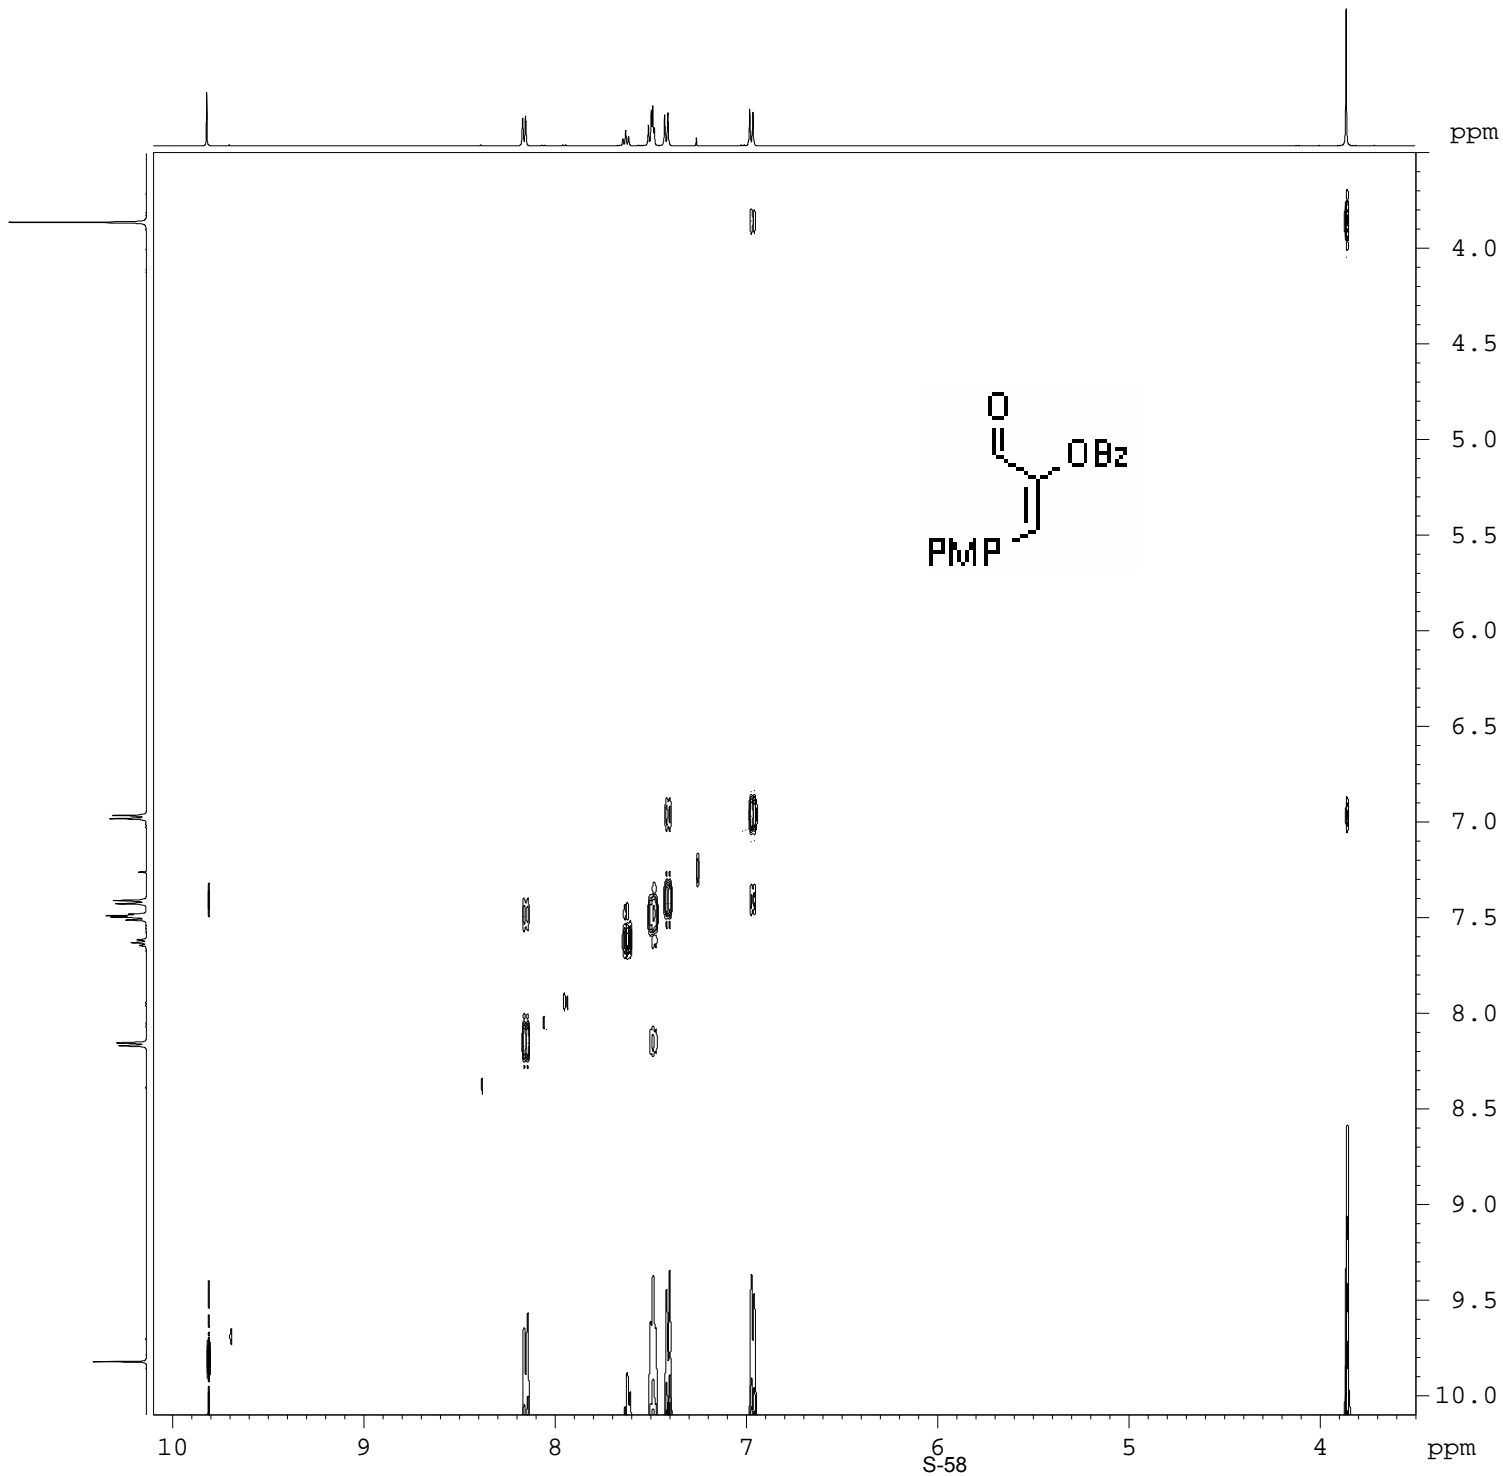

Current Data Parameters  
 NAME 09-149A  
 EXPNO 11  
 PROCNO 1  
 DU /u  
 USER nshapiro

F2 - Acquisition Parameters  
 Date\_ 20080501  
 Time 13.22  
 INSTRUM AV-500  
 PROBHD 5 mm TBI 1H/31  
 PULPROG noesygpph  
 TD 4096  
 SOLVENT CDC13  
 NS 1  
 DS 4  
 SWH 3591.954 Hz  
 FIDRES 0.876942 Hz  
 AQ 0.5703524 sec  
 RG 60  
 DW 139.200 usec  
 DE 7.11 usec  
 TE 300.0 K  
 d0 0.00012915 sec  
 D1 5.00000000 sec  
 D8 2.099999990 sec  
 D16 0.00010000 sec  
 IN0 0.00027765 sec  
 MCREST 0.00000000 sec  
 MCWRK 5.00000000 sec  
 TAU 1.04890001 sec

==== CHANNEL f1 =====  
 NUC1 1H  
 P1 7.60 usec  
 P2 15.20 usec  
 PL1 0.00 dB  
 SFO1 500.2333515 MHz

===== GRADIENT CHANNEL =====  
 GPNAM1 SINE.100  
 GPNAM2 SINE.100  
 GPX1 0.00 %  
 GPX2 0.00 %  
 GPY1 0.00 %  
 GPY2 0.00 %  
 GPZ1 40.00 %  
 GPZ2 -40.00 %  
 P16 1000.00 usec

F1 - Acquisition parameters  
 ND0 1  
 TD 128  
 SFO1 500.2334 MHz  
 FIDRES 28.137943 Hz  
 SW 7.200 ppm  
 FnmODE TPPI

F2 - Processing parameters  
 SI 2048  
 SF 500.2300104 MHz  
 WDW QSINE  
 SSB 2  
 LB 0.00 Hz  
 GB 0  
 PC 4.00

F1 - Processing parameters  
 SI 2048  
 MC2 TPPI  
 SF 500.2300104 MHz  
 WDW QSINE  
 SSB 2  
 LB 0.00 Hz  
 GB 0

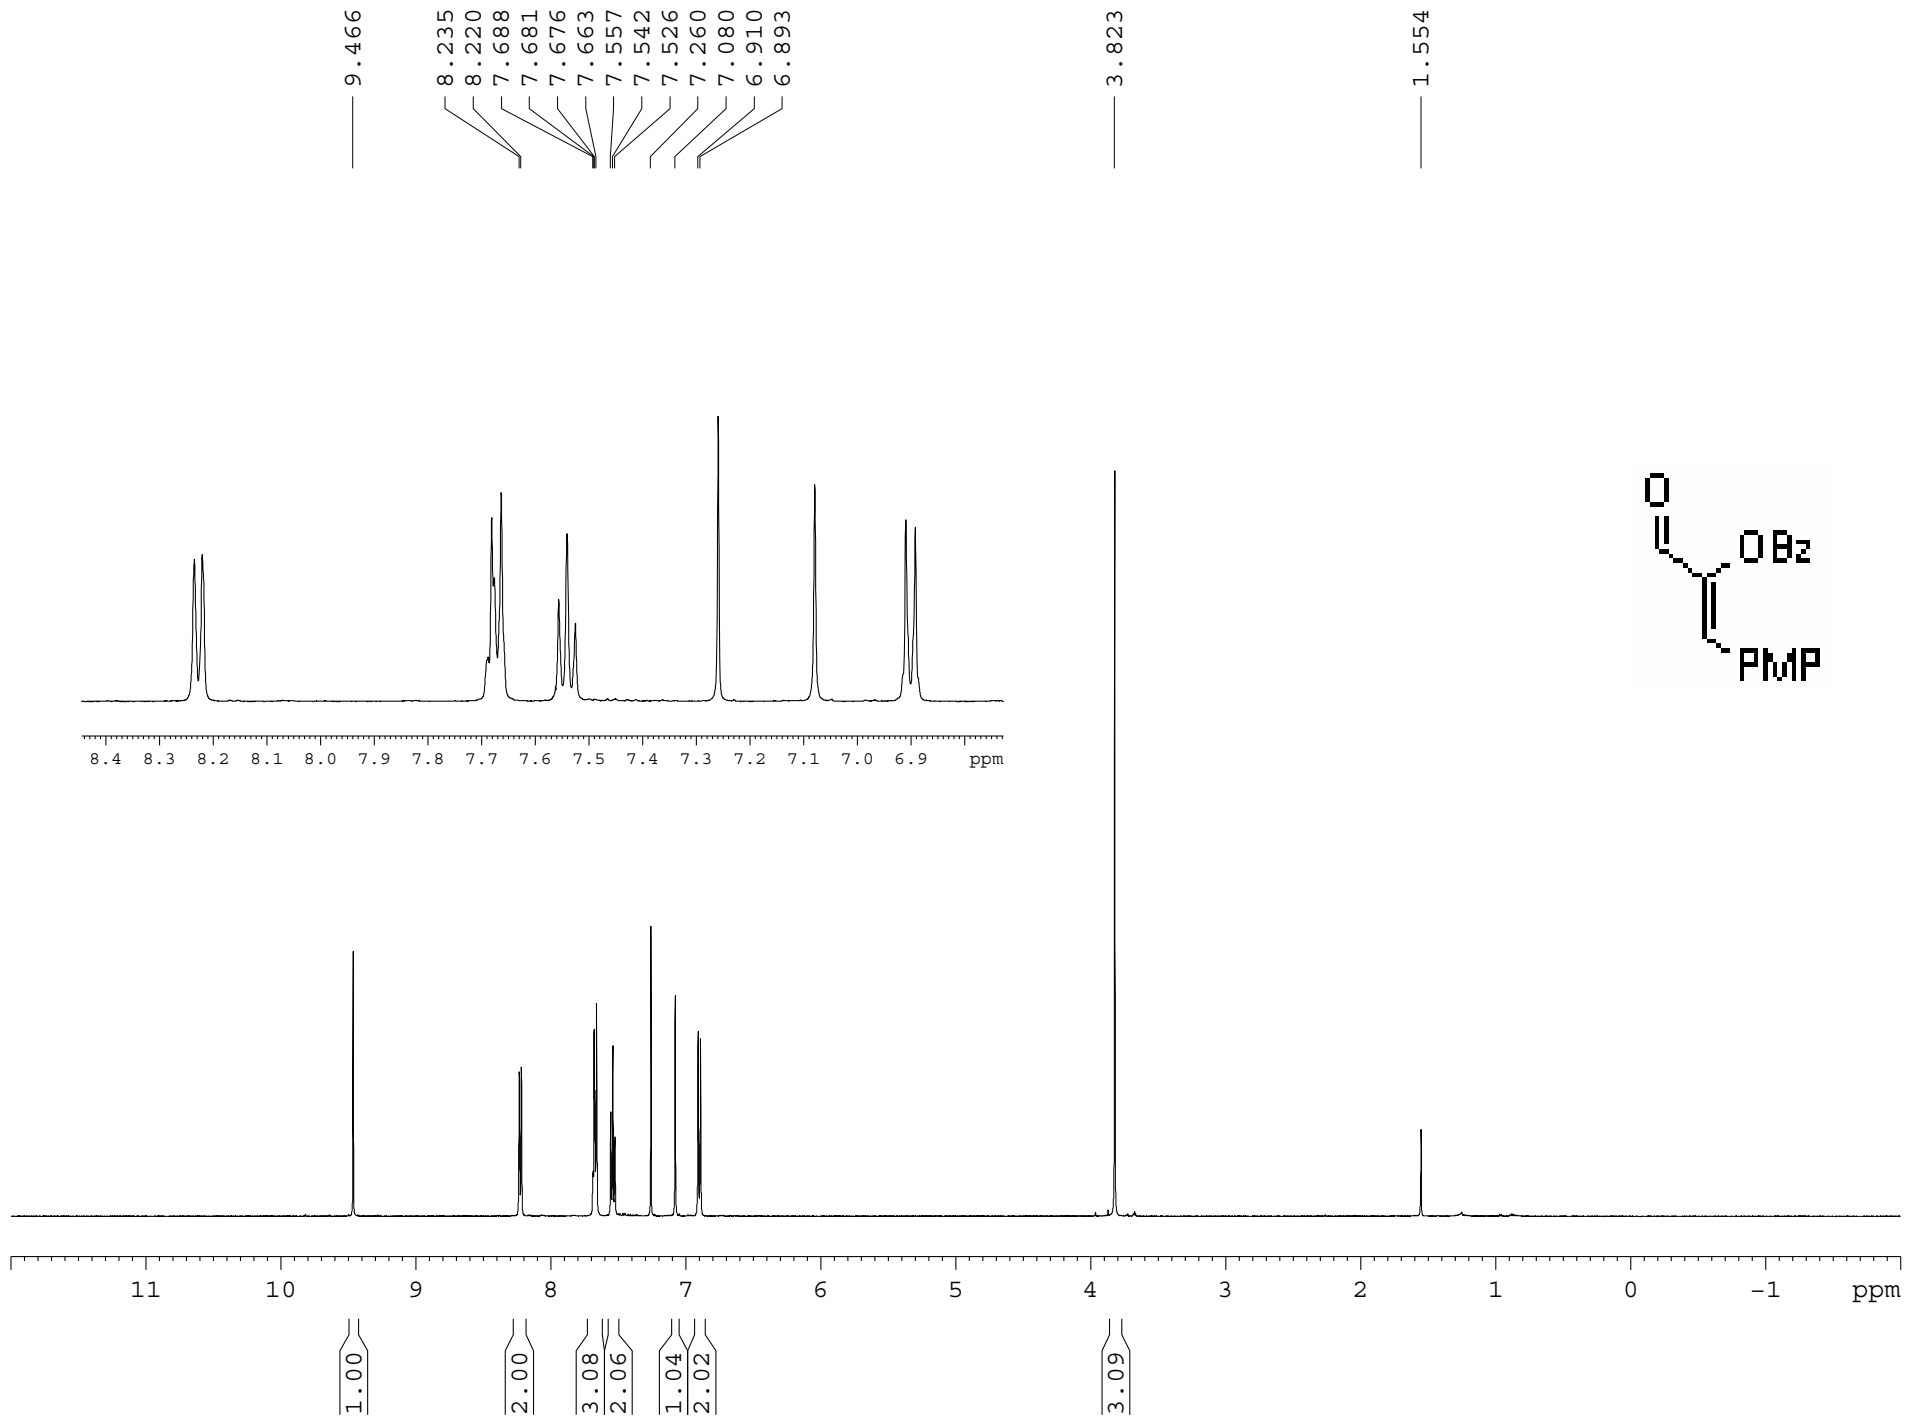

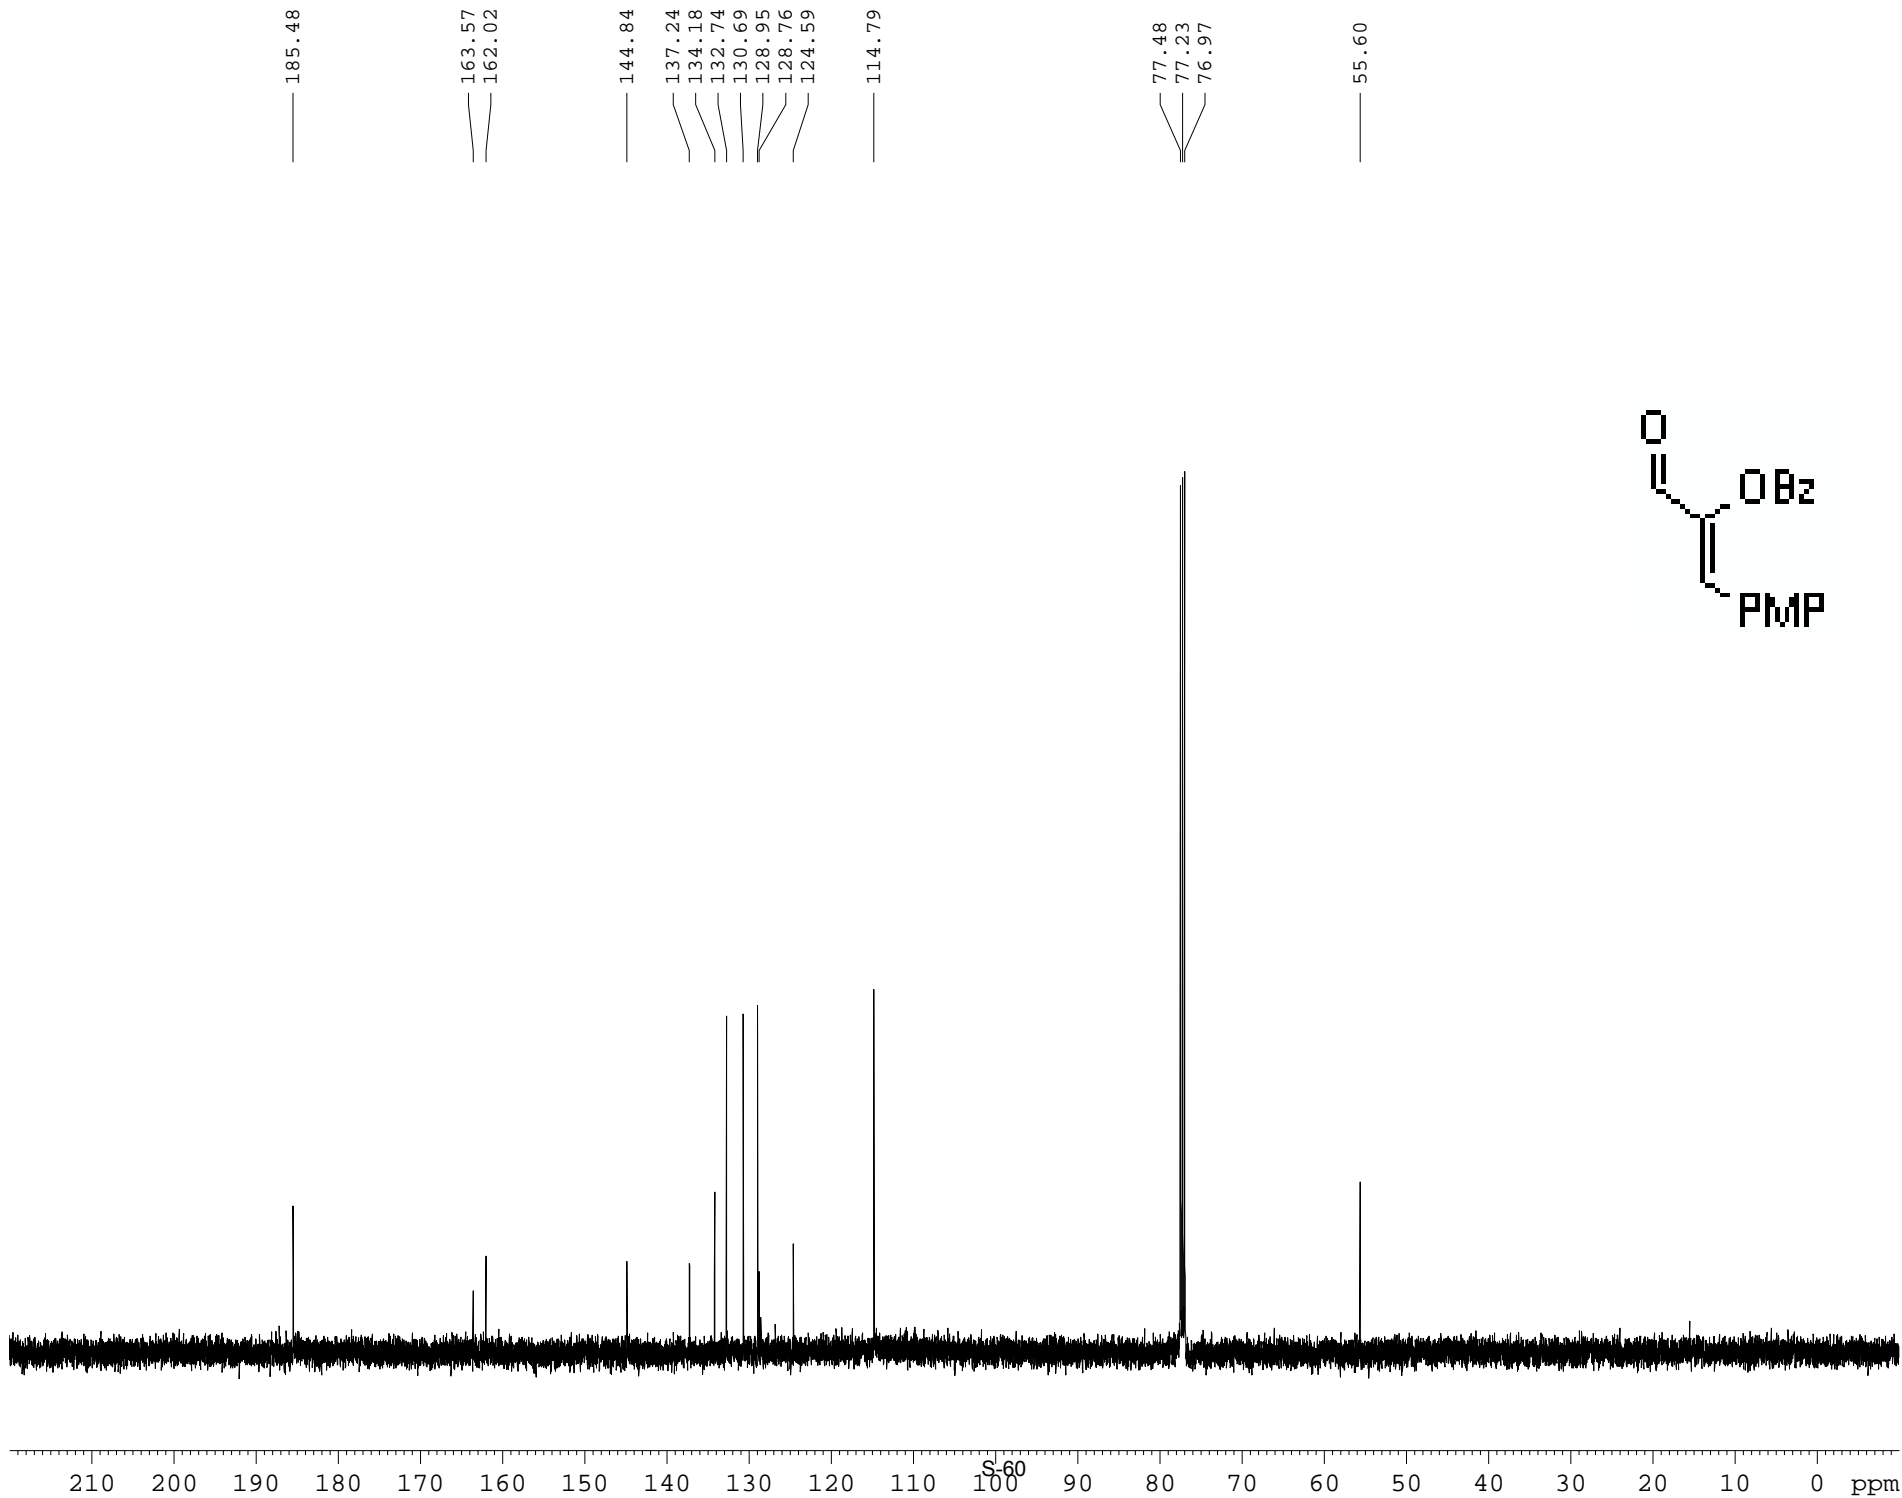



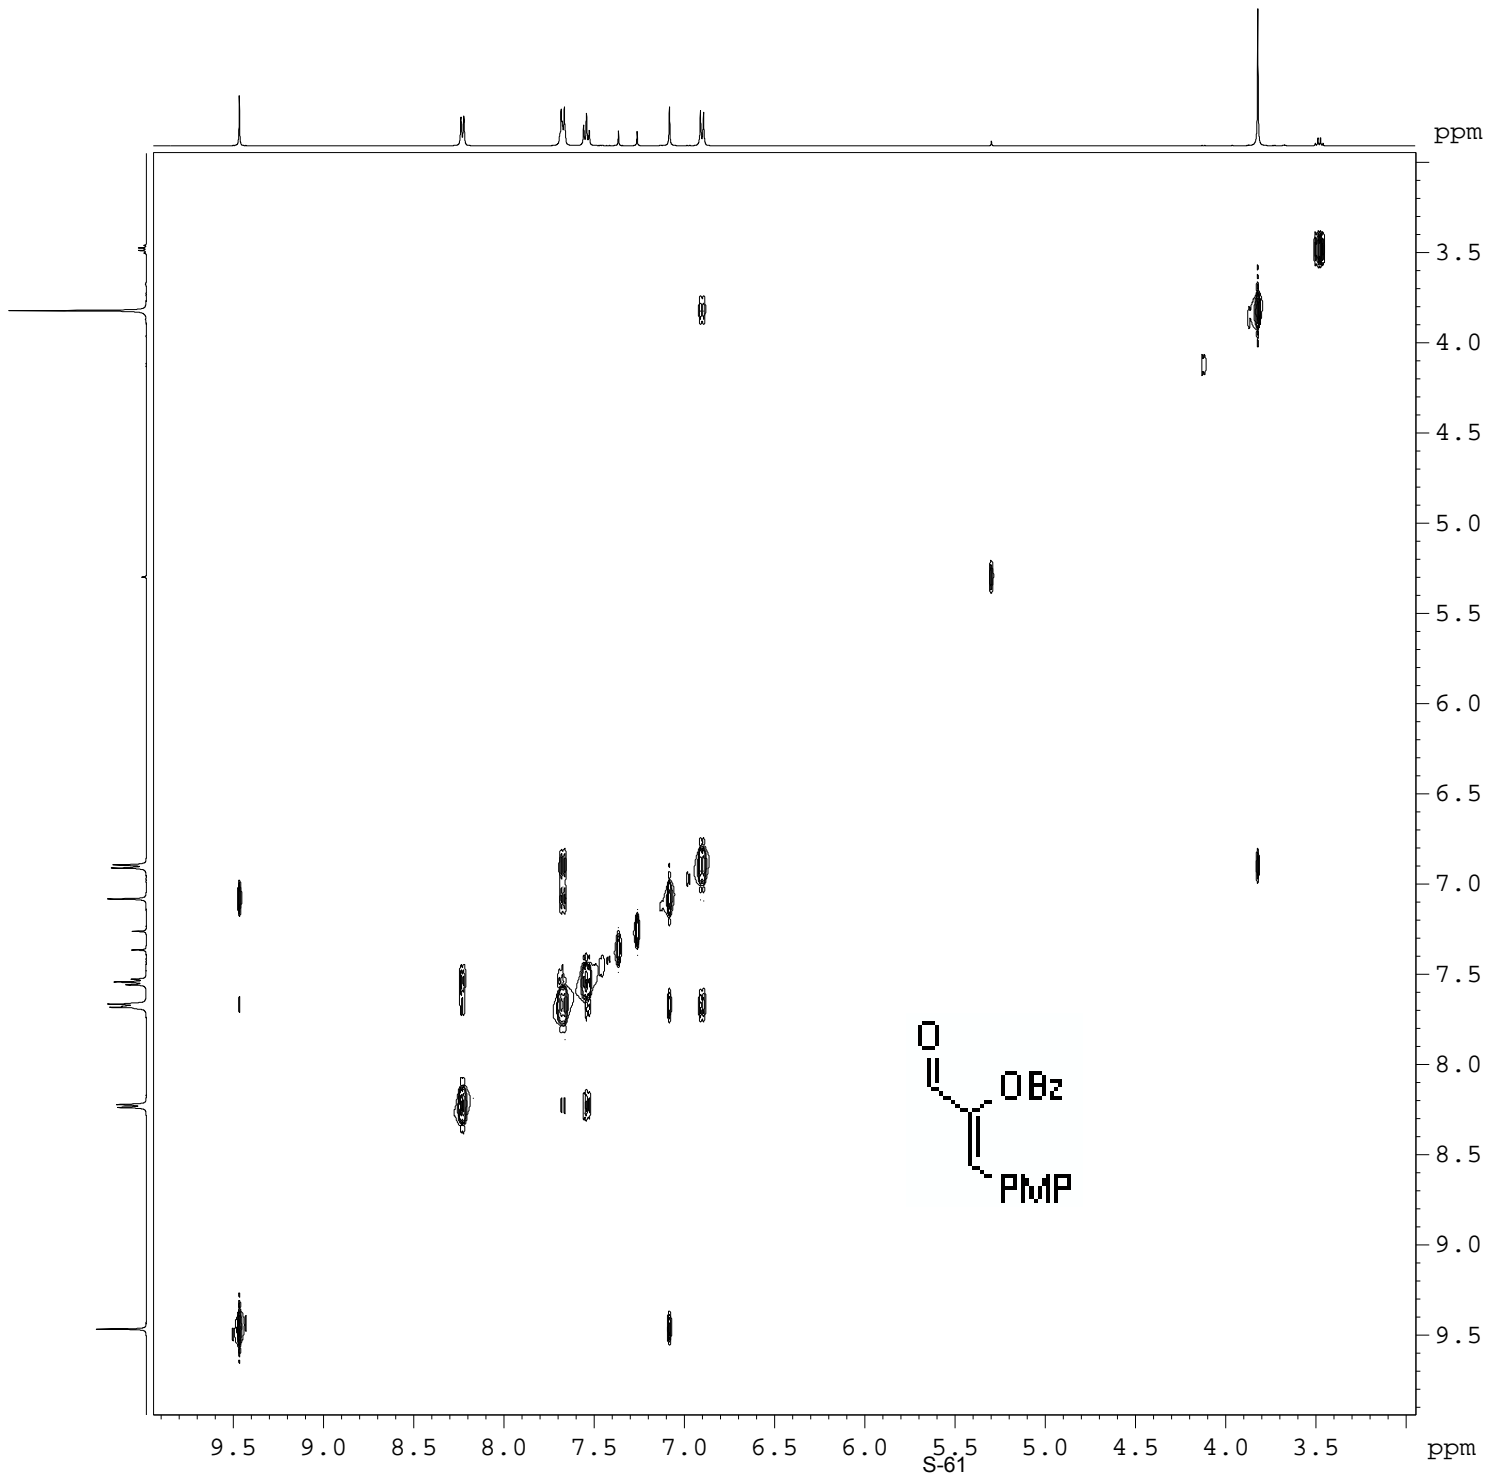

Current Data Parameters  
 NAME 09-149C-2  
 EXPNO 11  
 PROCNO 1  
 DU /u  
 USER nshapiro

F2 - Acquisition Parameters  
 Date\_ 20080501  
 Time\_ 12.43  
 INSTRUM AV-500  
 PROBHD 5 mm TBI 1H/31  
 PULPROG noesygpph  
 TD 4096  
 SOLVENT CDCl3  
 NS 2  
 DS 8  
 SWH 3501.401 Hz  
 FIDRES 0.854834 Hz  
 AQ 0.5851016 sec  
 RG 222  
 DW 142.800 usec  
 DE 7.11 usec  
 TE 300.0 K  
 d0 0.00013312 sec  
 D1 5.00000000 sec  
 D8 2.09999990 sec  
 D16 0.00010000 sec  
 IN0 0.00028559 sec  
 MCREST 0.00000000 sec  
 MCWRK 5.00000000 sec  
 TAU 1.04890001 sec

==== CHANNEL f1 =====  
 NUC1 1H  
 P1 7.60 usec  
 P2 15.20 usec  
 PL1 0.00 dB  
 SFO1 500.2332515 MHz

===== GRADIENT CHANNEL =====  
 GPNAM1 SINE.100  
 GPNAM2 SINE.100  
 GPX1 0.00 %  
 GPX2 0.00 %  
 GPY1 0.00 %  
 GPY2 0.00 %  
 GPZ1 40.00 %  
 GPZ2 -40.00 %  
 P16 1000.00 usec

F1 - Acquisition parameters  
 NDO 1  
 TD 128  
 SFO1 500.2333 MHz  
 FIDRES 27.355888 Hz  
 SW 7.000 ppm  
 FnmODE TPPI

F2 - Processing parameters  
 SI 2048  
 SF 500.2300289 MHz  
 WDW QSINE  
 SSB 2  
 LB 0.00 Hz  
 GB 0  
 PC 4.00

F1 - Processing parameters  
 SI 2048  
 MC2 TPPI  
 SF 500.2300288 MHz  
 WDW QSINE  
 SSB 2  
 LB 0.00 Hz  
 GB 0

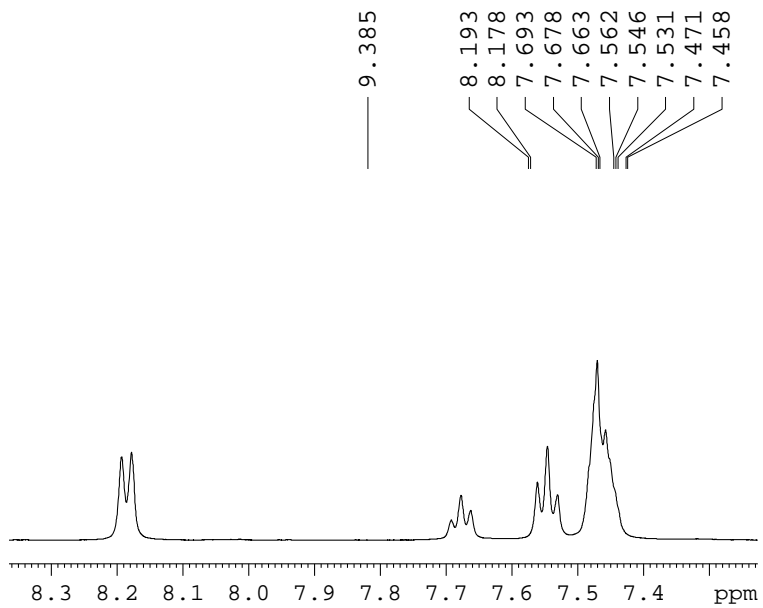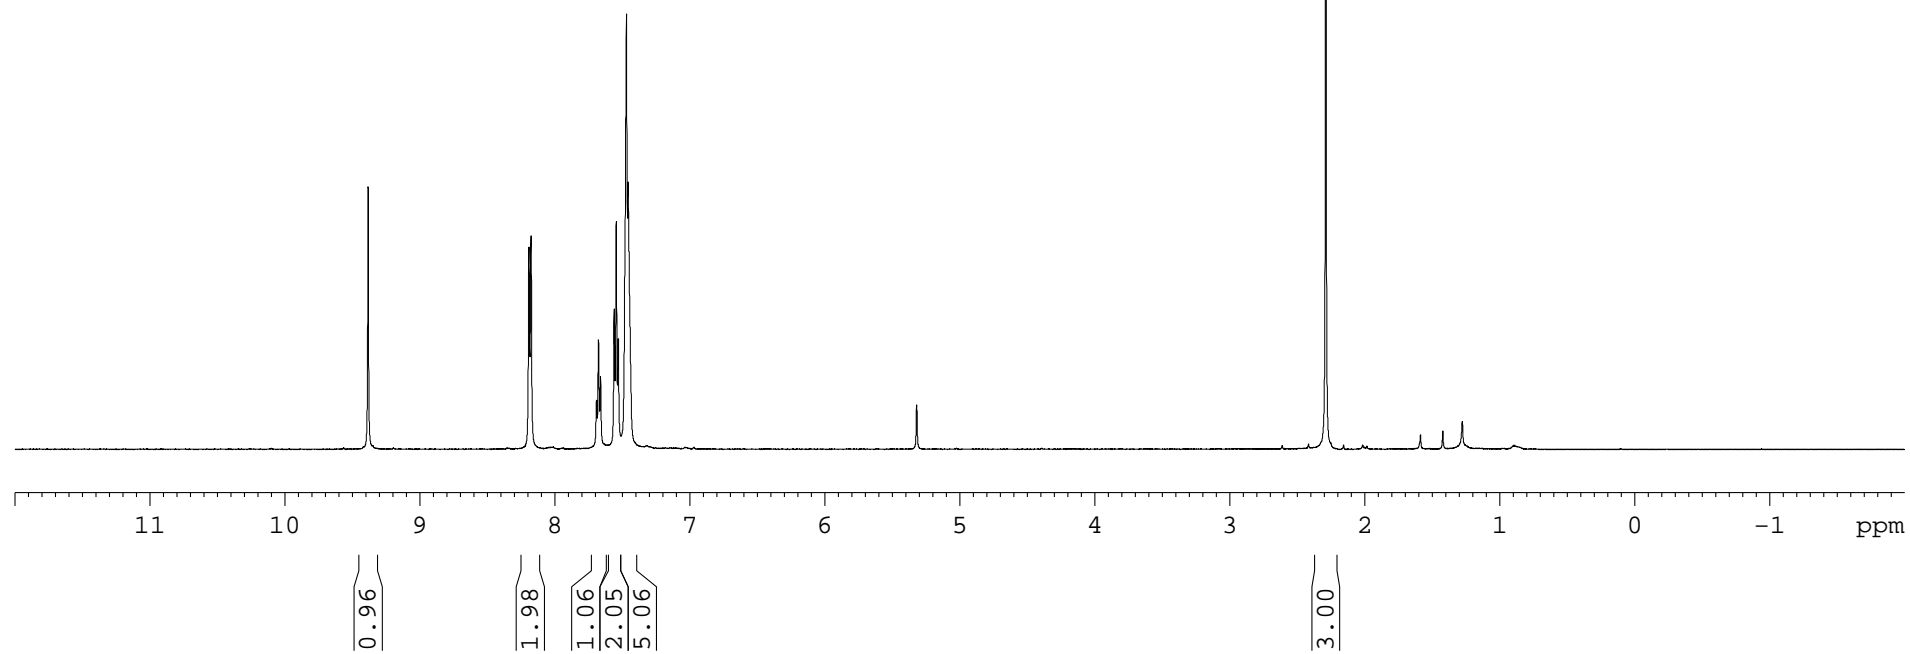

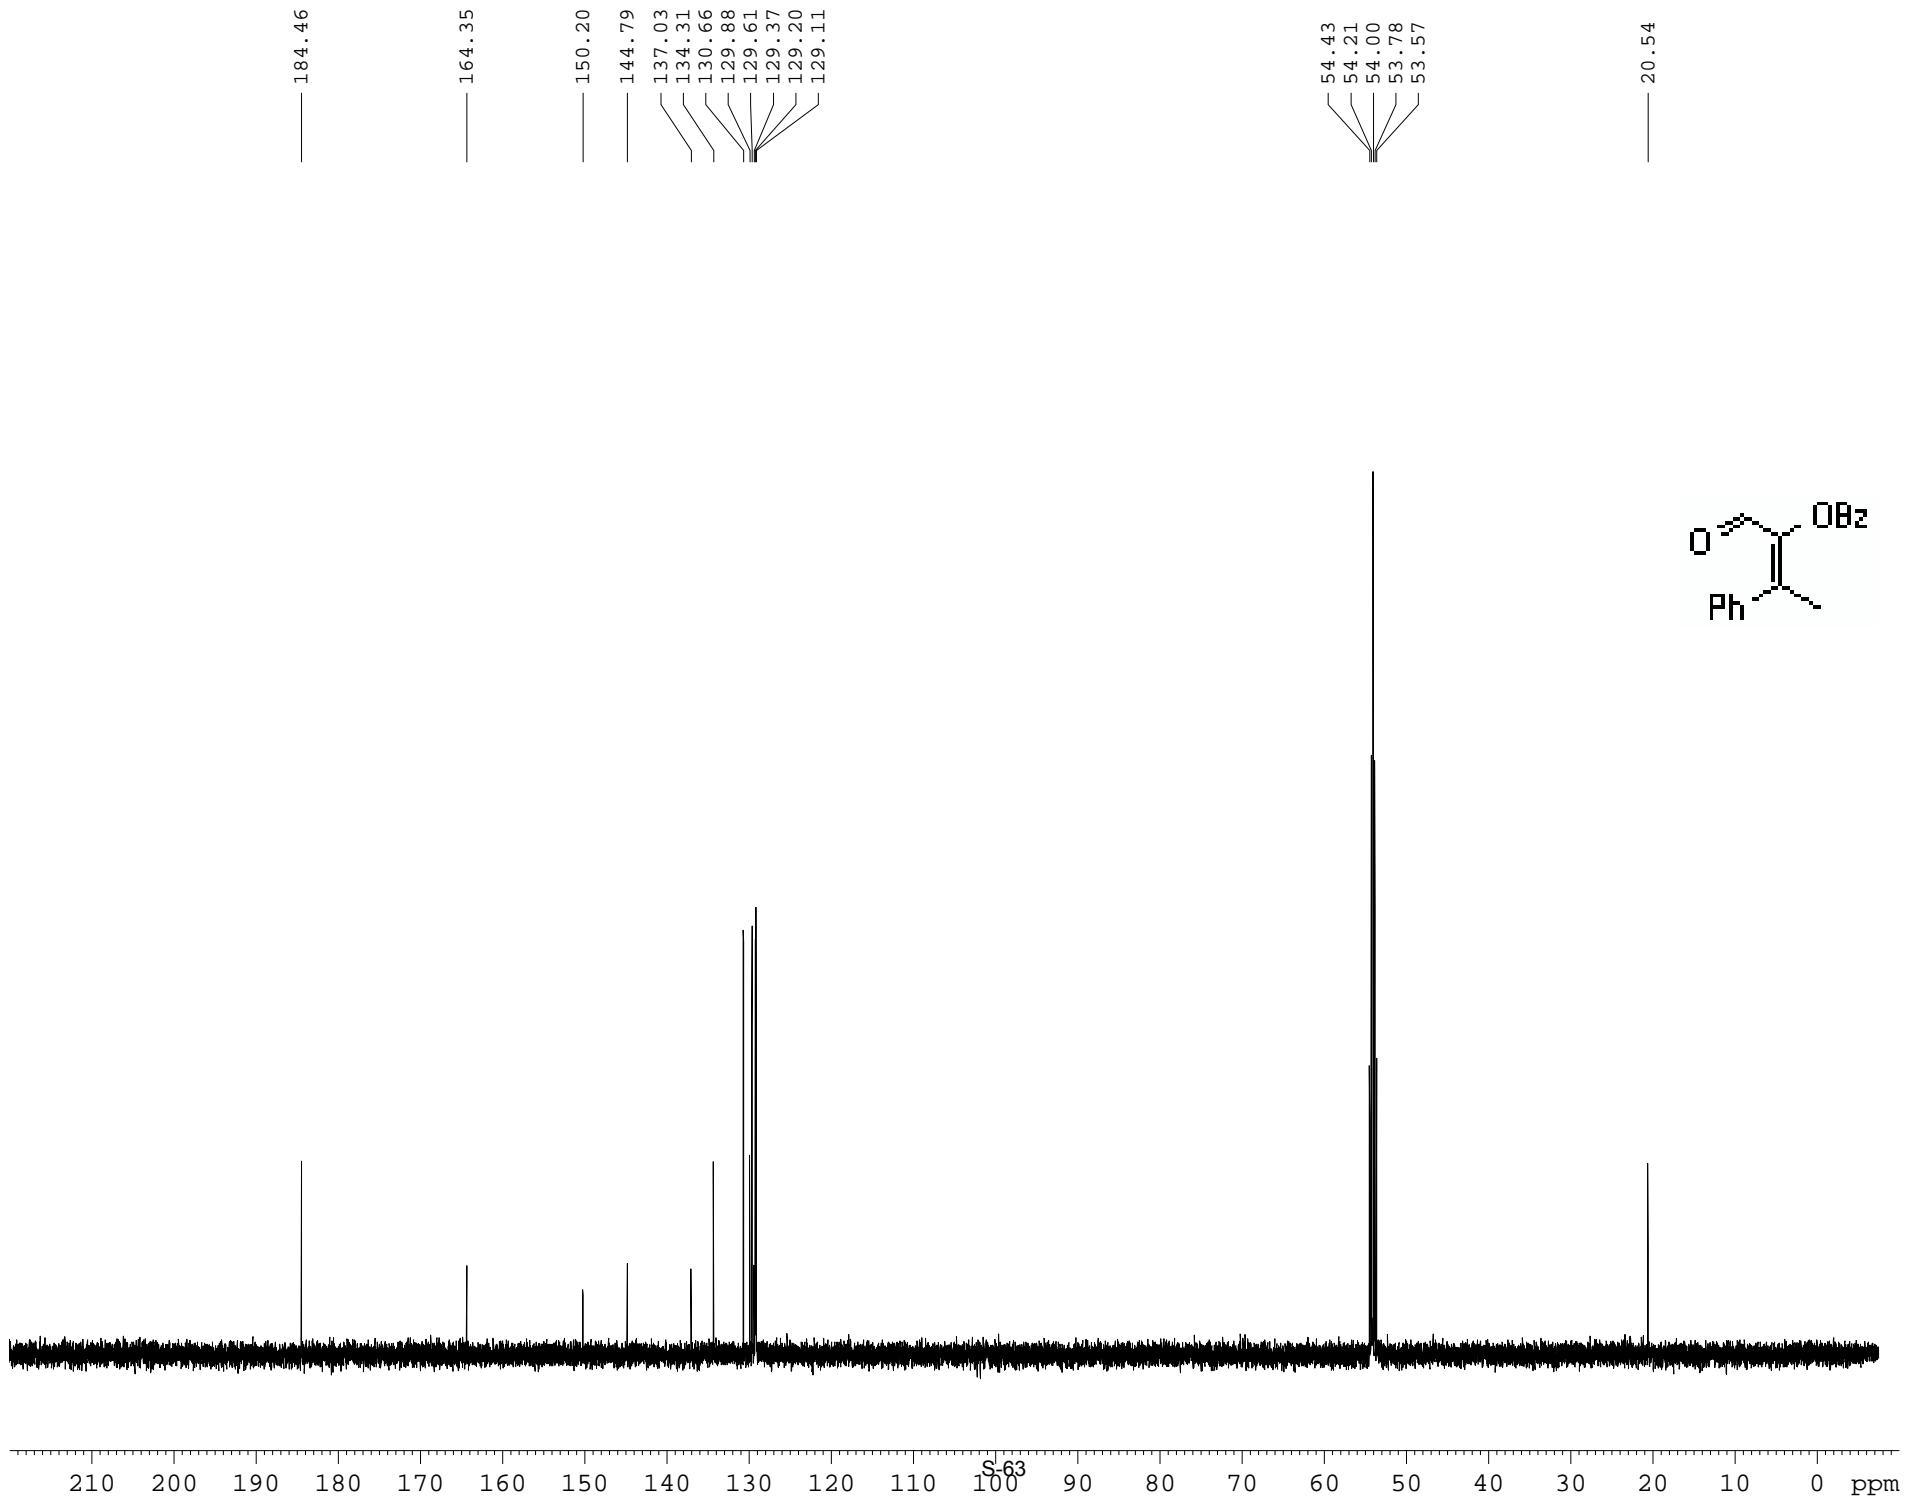

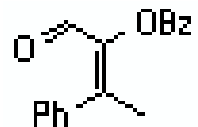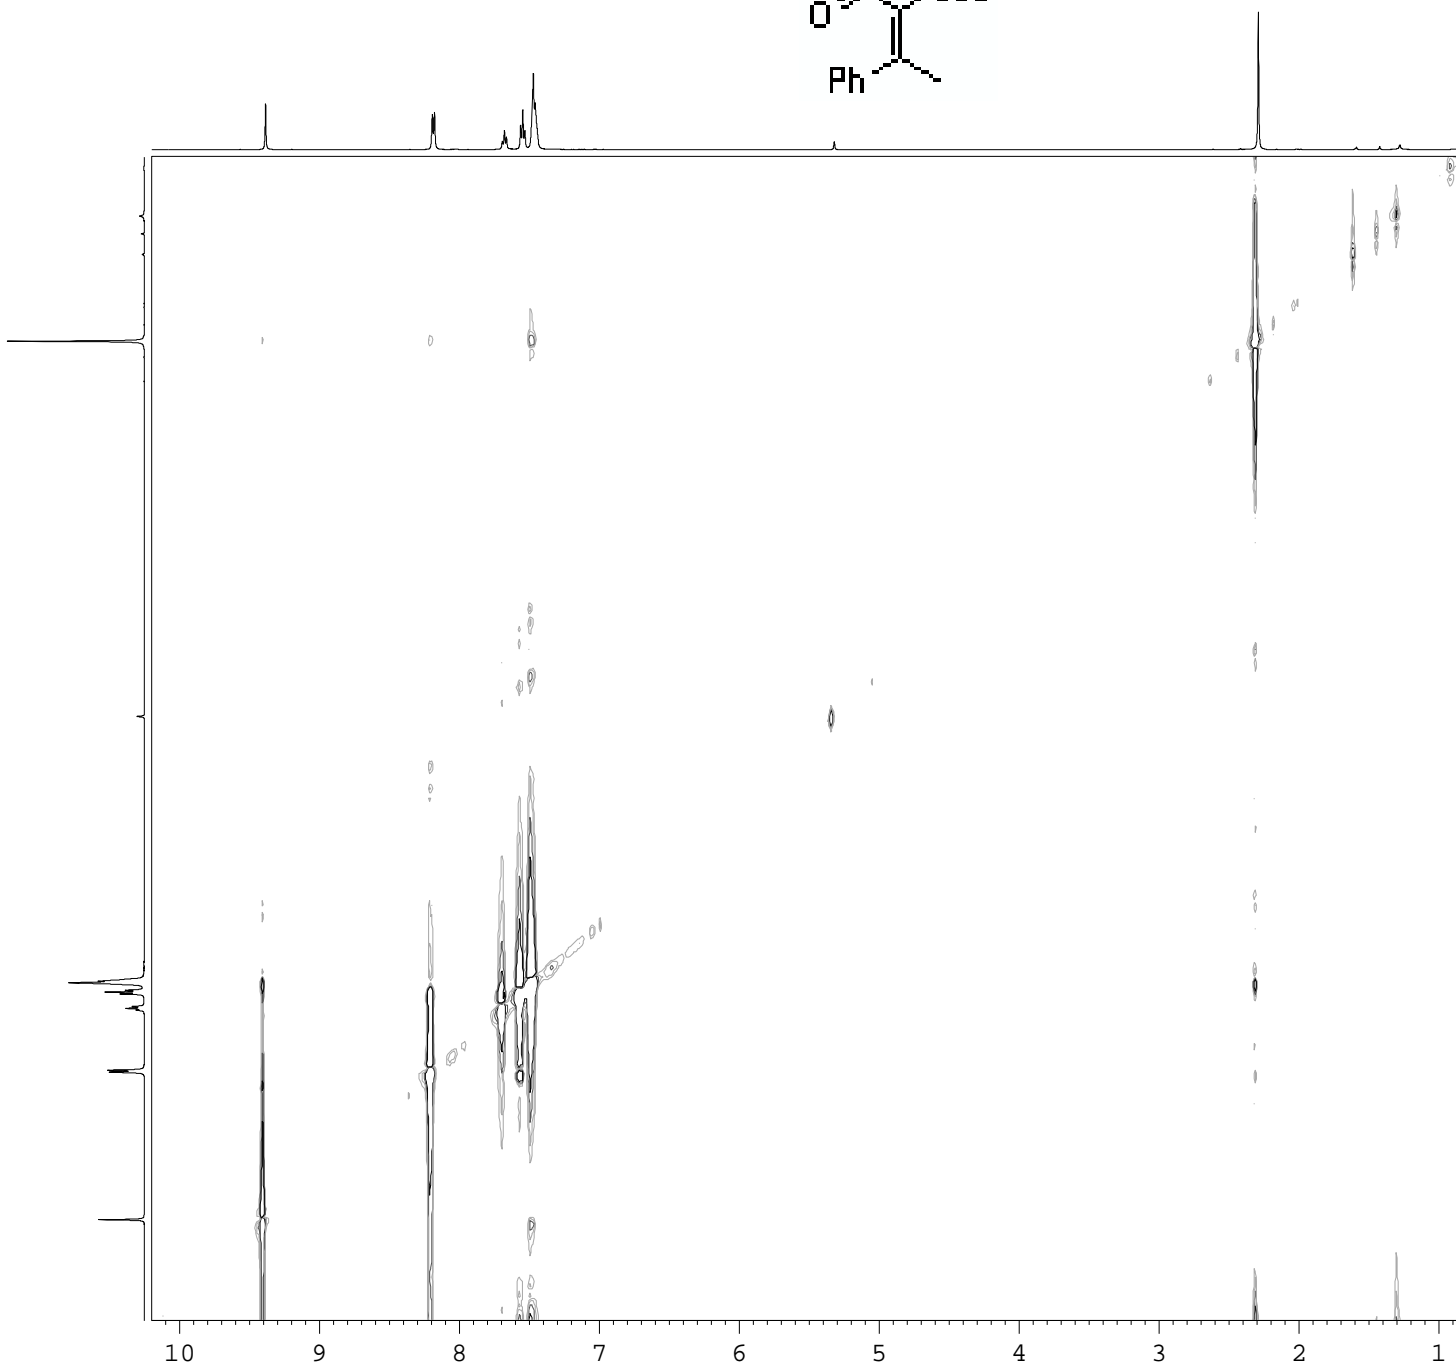

```

Current Data Parameters
NAME          09-132A
EXPNO         11
PROCNO        1
DU            /u
USER          nshapiro

ppm F2 - Acquisition Parameters
Date_         20080427
Time          10.21
1.0 INSTRUM   DRX-500
PROBHD       5 mm BBO BB-1H
PULPROG      noesygpph
1.5 TD        2048
SOLVENT      CDCl3
NS            1
DS            4
2.0 SWH       5000.000 Hz
FIDRES       2.441406 Hz
AQ           0.2048500 sec
2.5 RG        128
DW           100.000 usec
DE           7.11 usec
3.0 TE        293.0 K
d0           0.00008444 sec
D1           6.00000000 sec
D8           2.73000002 sec
3.5 D16       0.00020000 sec
INO         0.00019995 sec
MCREST       0.00000000 sec
4.0 MCWRK     6.00000000 sec
TAU         1.36380005 sec

===== CHANNEL f1 =====
4.5 NUC1       1H
P1           12.20 usec
P2           24.40 usec
5.0 PL1        -5.00 dB
SFO1         500.1327507 MHz

===== GRADIENT CHANNEL =====
5.5 GPNAM1     SINE.100
GPNAM2       SINE.100
6.0 GPX1        0.00 %
GPX2         0.00 %
GPY1         0.00 %
GPY2         0.00 %
6.5 GPZ1        40.00 %
GPZ2        -40.00 %
P16          1000.00 usec

7.0 F1 - Acquisition parameters
ND0          1
TD           256
7.5 SFO1       500.1328 MHz
FIDRES       19.536135 Hz
SW           10.000 ppm
FnMODE       TPPI
8.0 F2 - Processing parameters
SI           1024
8.5 SF         500.1300127 MHz
WDW          QSINE
SSB          2
9.0 LB         0.00 Hz
GB           0
PC           5.00

9.5 F1 - Processing parameters
SI           256
MC2          TPPI
9.0 SF         500.1300128 MHz
WDW          QSINE
SSB          2
LB           0.00 Hz
GB           0

```

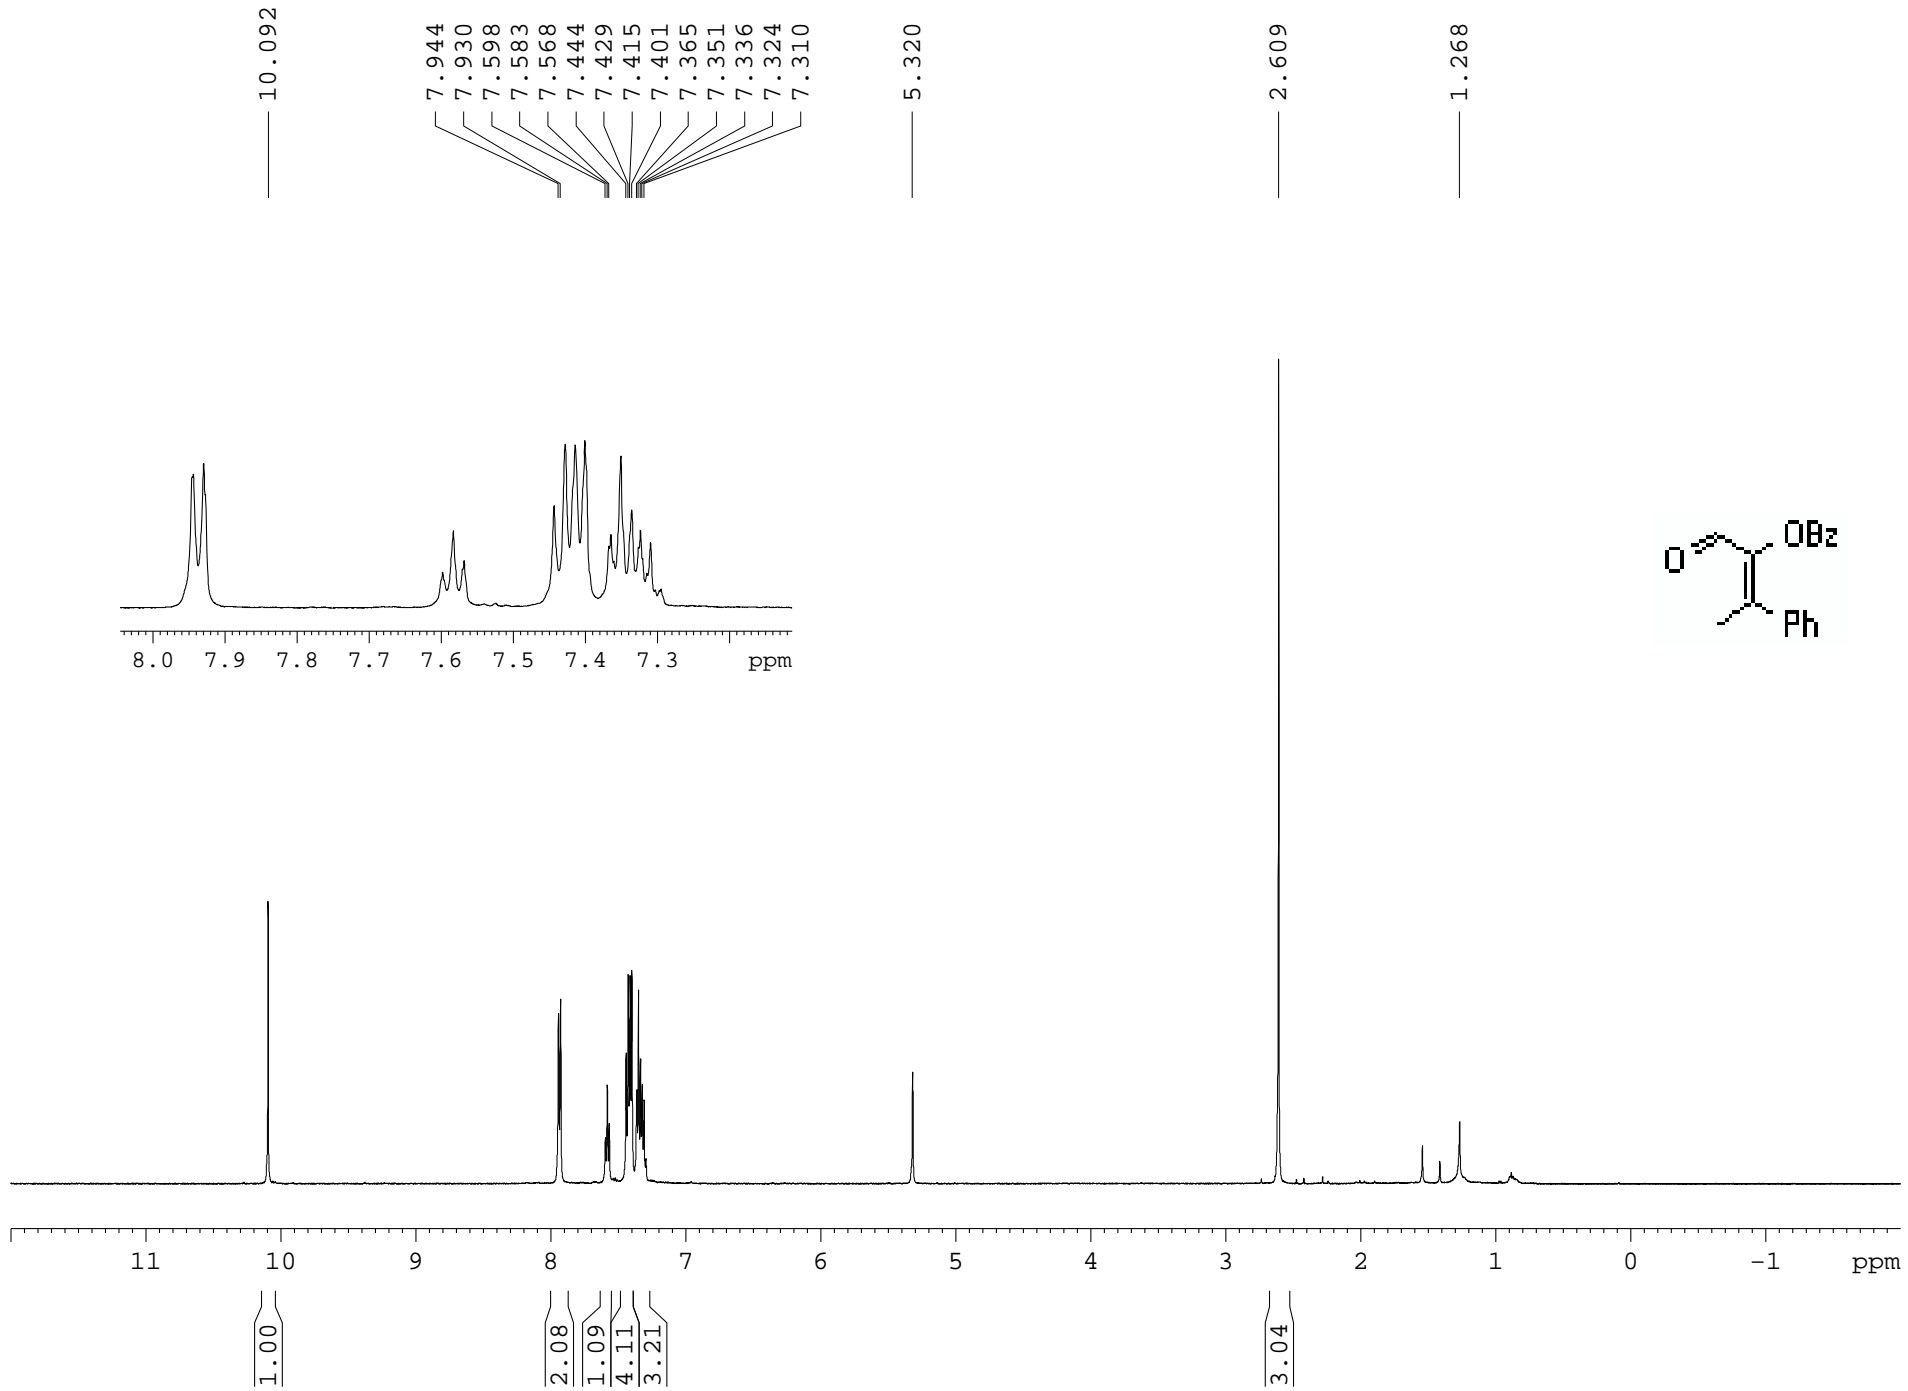

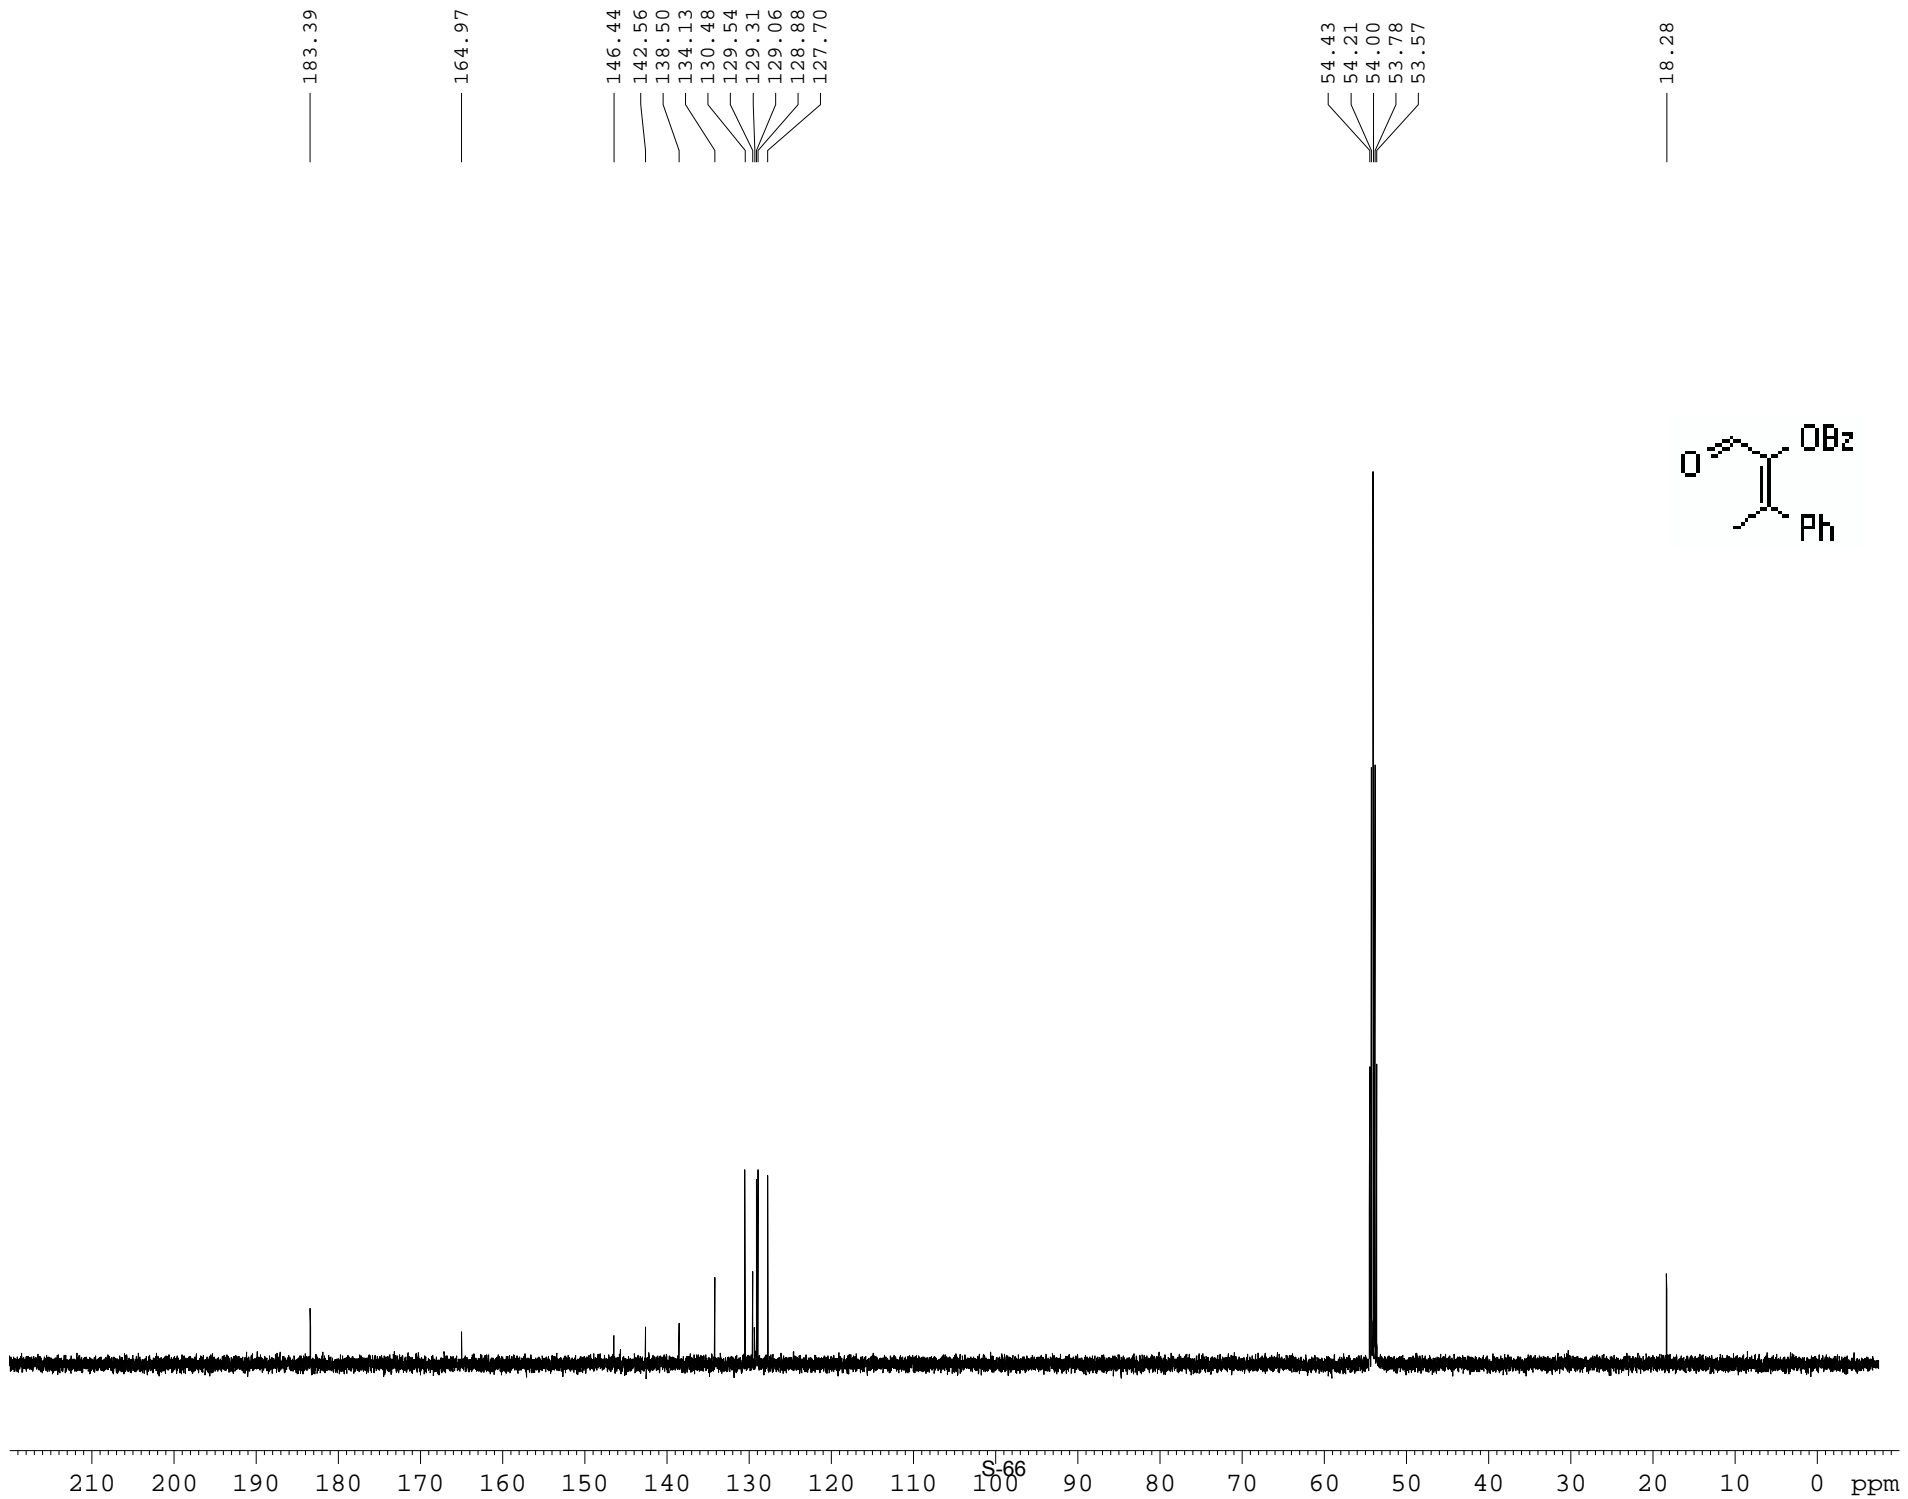

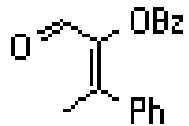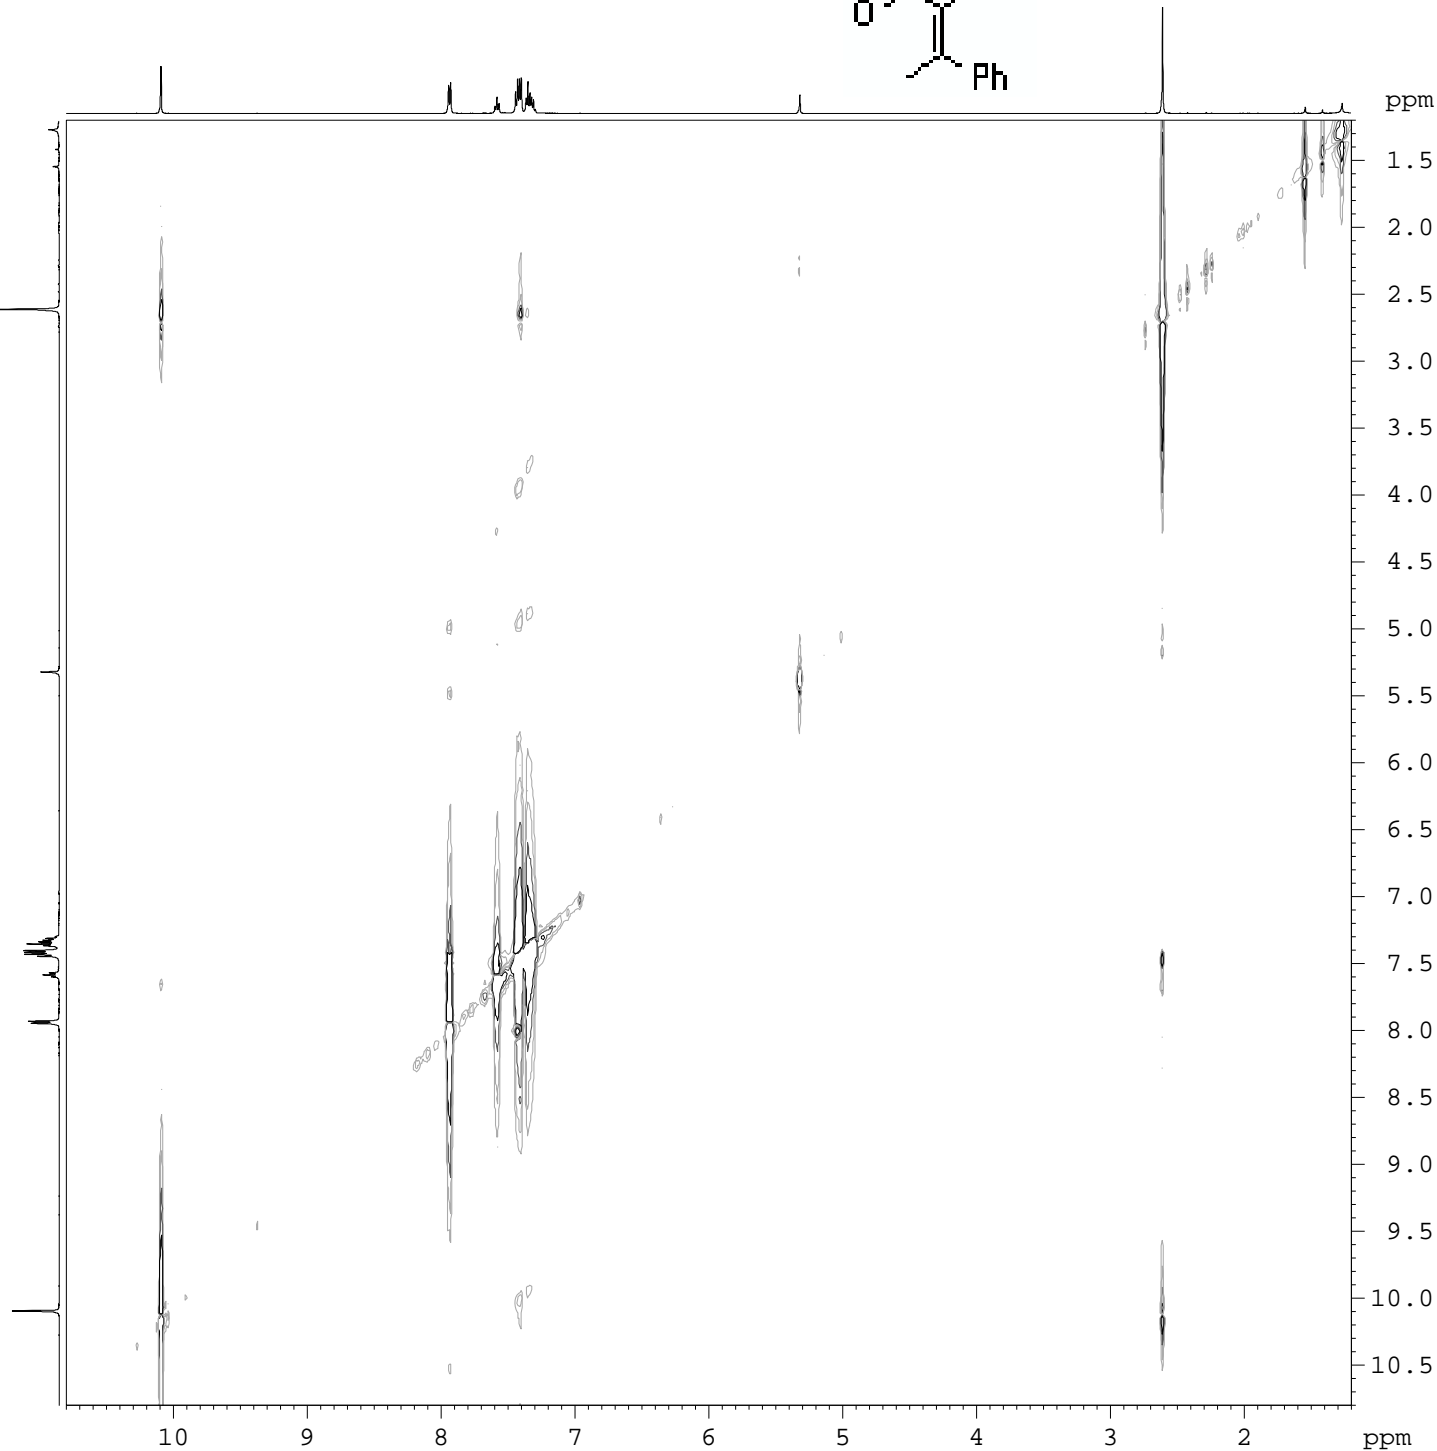

Current Data Parameters  
 NAME 09-132B  
 EXPNO 11  
 PROCNO 1  
 DU /u  
 USER nshapiro

F2 - Acquisition Parameters  
 Date\_ 20080427  
 Time 11.13  
 INSTRUM DRX-500  
 PROBHD 5 mm BBO BB-1H  
 PULPROG noesygpph  
 TD 2048  
 SOLVENT CDCl3  
 NS 2  
 DS 4  
 SWH 5000.000 Hz  
 FIDRES 2.441406 Hz  
 AQ 0.2048500 sec  
 RG 128  
 DW 100.000 use  
 DE 7.11 use  
 TE 293.0 K  
 d0 0.00008444 sec  
 D1 4.00000000 sec  
 D8 2.11999989 sec  
 D16 0.00020000 sec  
 IN0 0.00019995 sec  
 MCREST 0.00000000 sec  
 MCWRK 4.00000000 sec  
 TAU 1.05879998 sec

==== CHANNEL f1 =====  
 NUC1 1H  
 P1 12.20 use  
 P2 24.40 use  
 PL1 -5.00 dB  
 SFO1 500.1330008 MHz

==== GRADIENT CHANNEL ===  
 GPNAM1 SINE.100  
 GPNAM2 SINE.100  
 GPX1 0.00 %  
 GPX2 0.00 %  
 GPY1 0.00 %  
 GPY2 0.00 %  
 GPZ1 40.00 %  
 GPZ2 -40.00 %  
 P16 1000.00 use

F1 - Acquisition parameters  
 ND0 1  
 TD 256  
 SFO1 500.133 MHz  
 FIDRES 19.536135 Hz  
 SW 10.000 ppm  
 FnMODE TPPI

F2 - Processing parameters  
 SI 1024  
 SF 500.1300127 MHz  
 WDW QSINE  
 SSB 2  
 LB 0.00 Hz  
 GB 0  
 PC 5.00

F1 - Processing parameters  
 SI 256  
 MC2 TPPI  
 SF 500.1300128 MHz  
 WDW QSINE  
 SSB 2  
 LB 0.00 Hz  
 GB 0

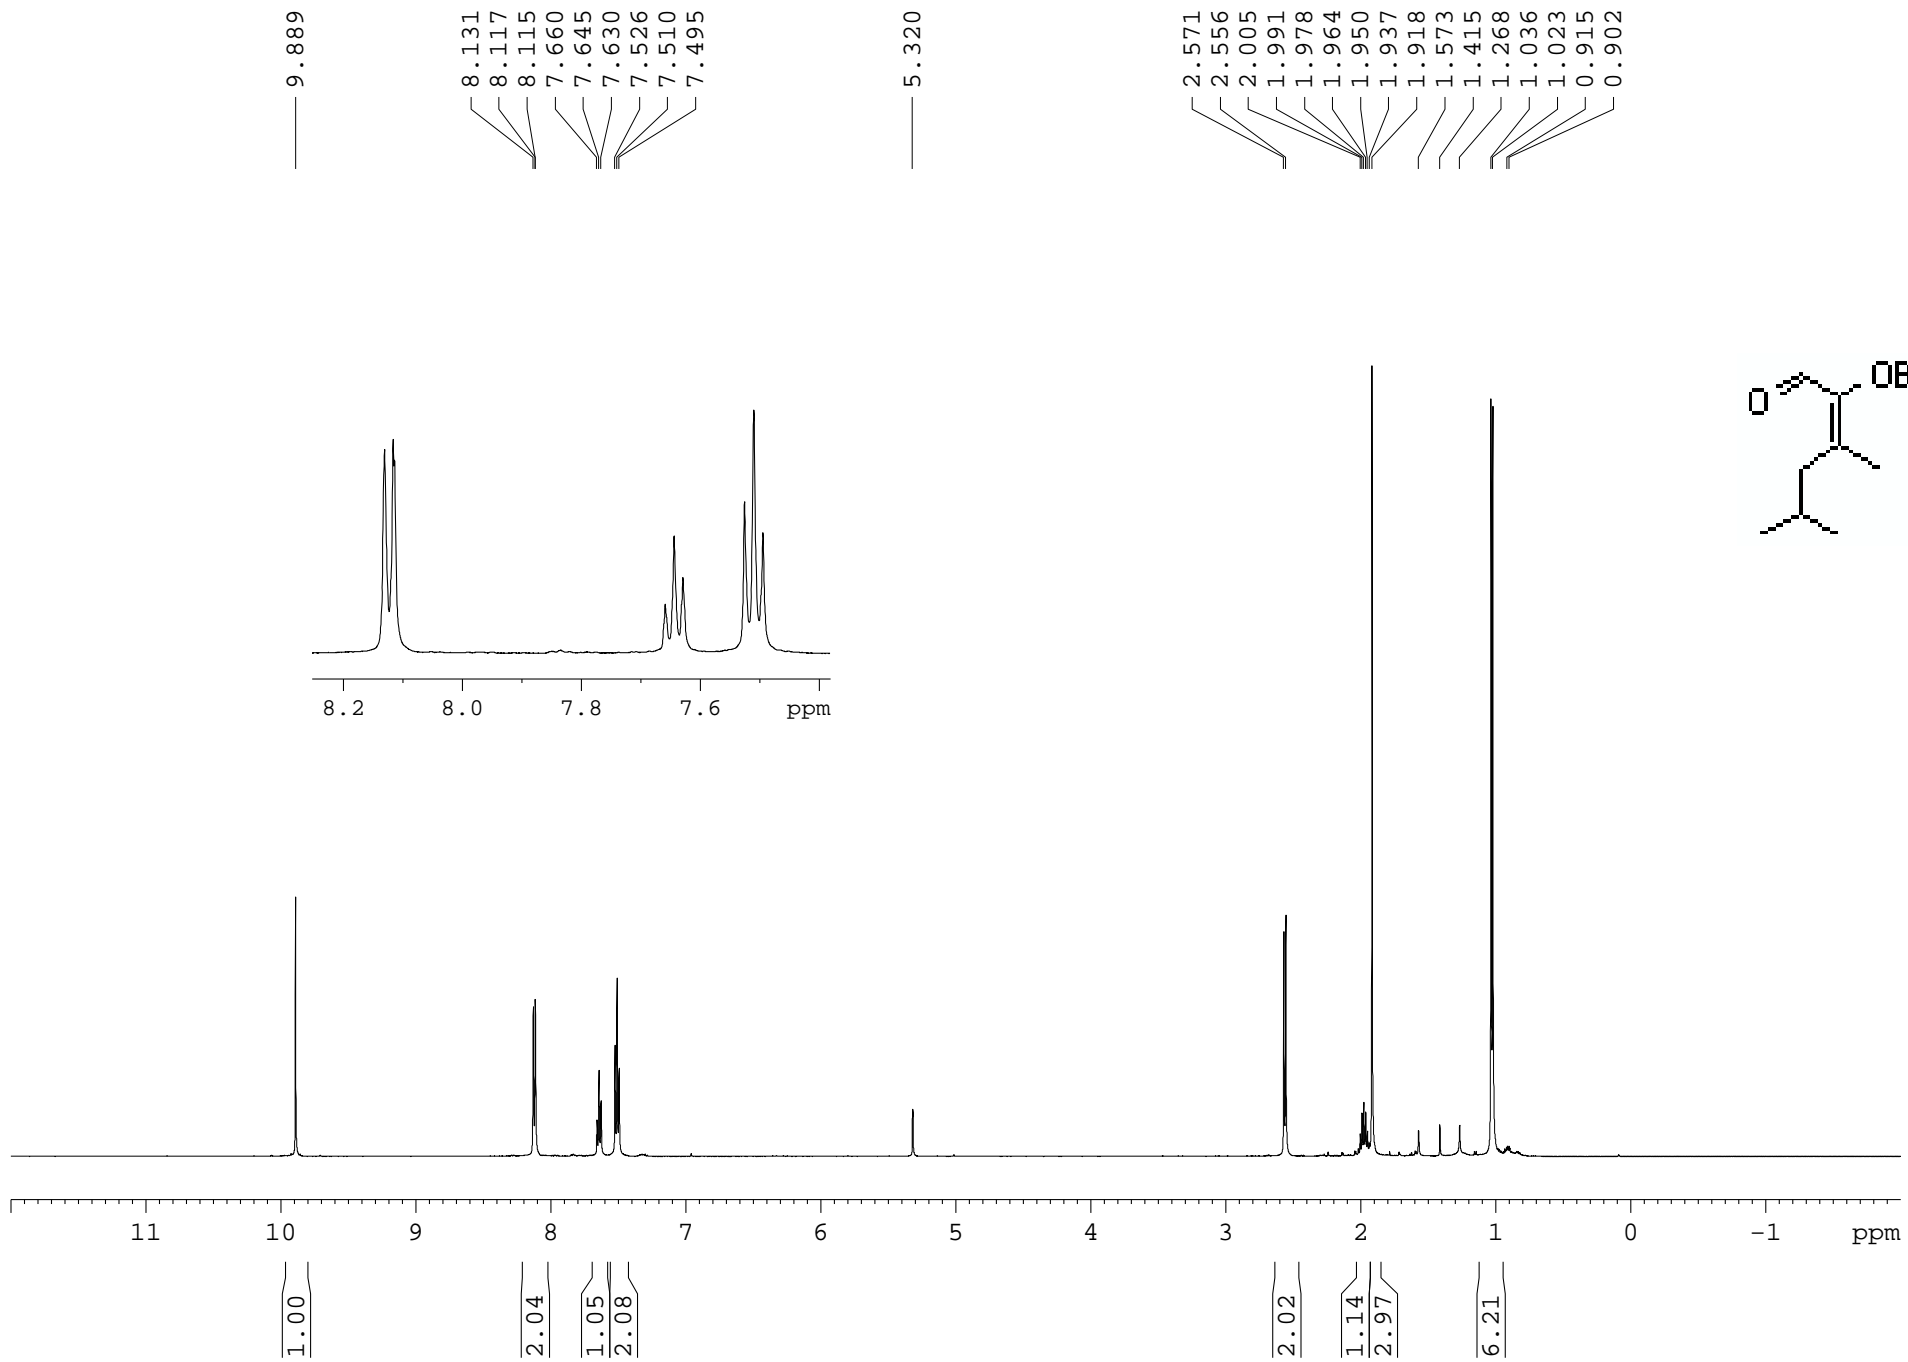



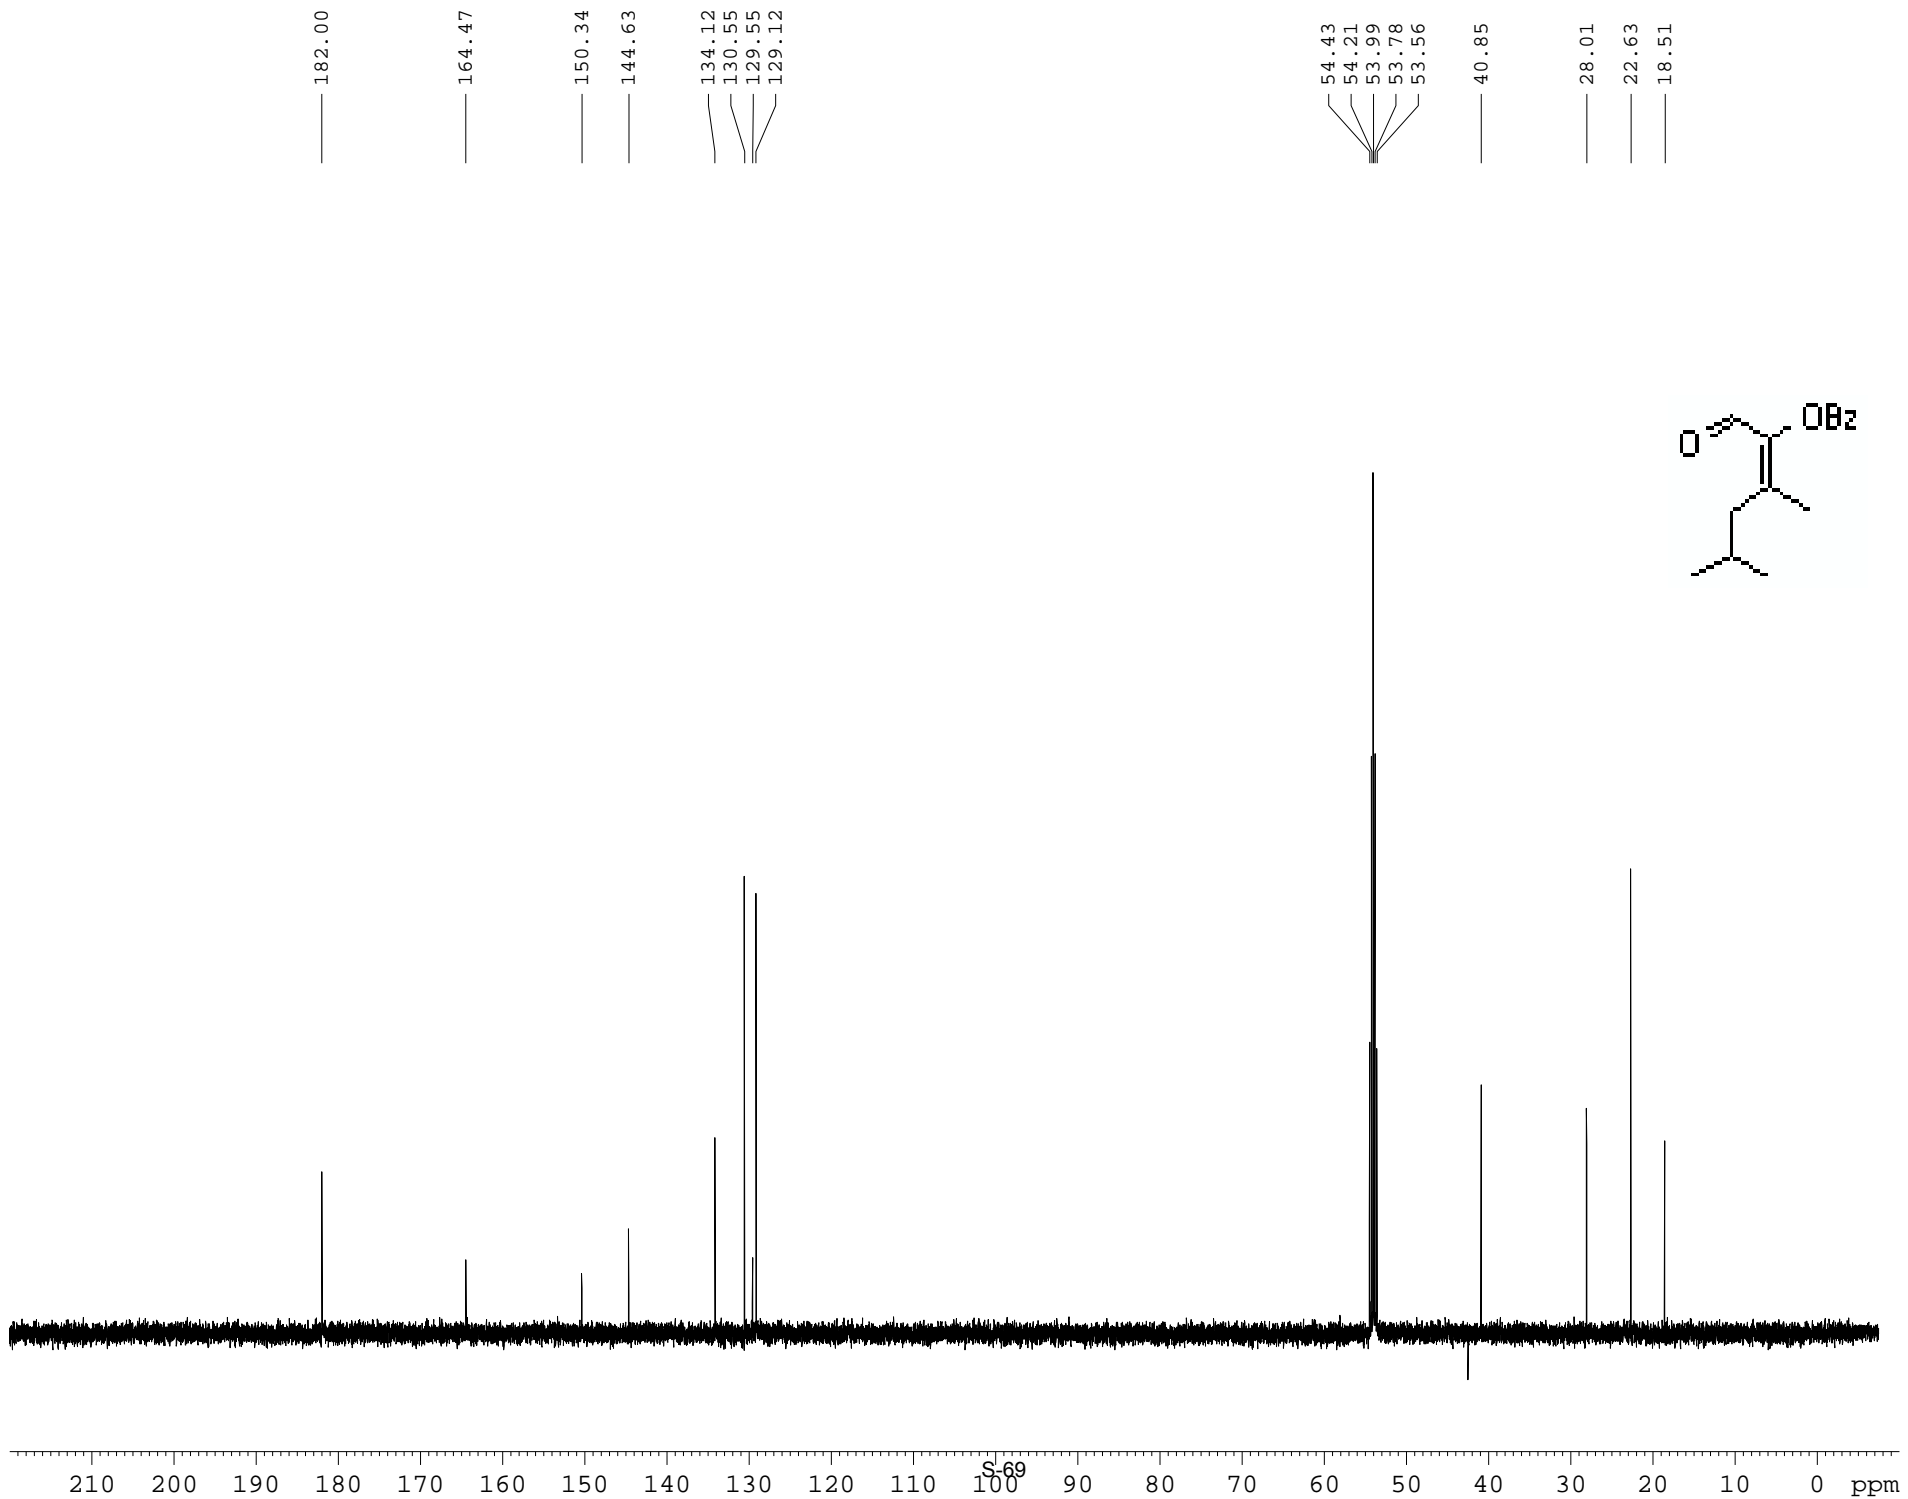

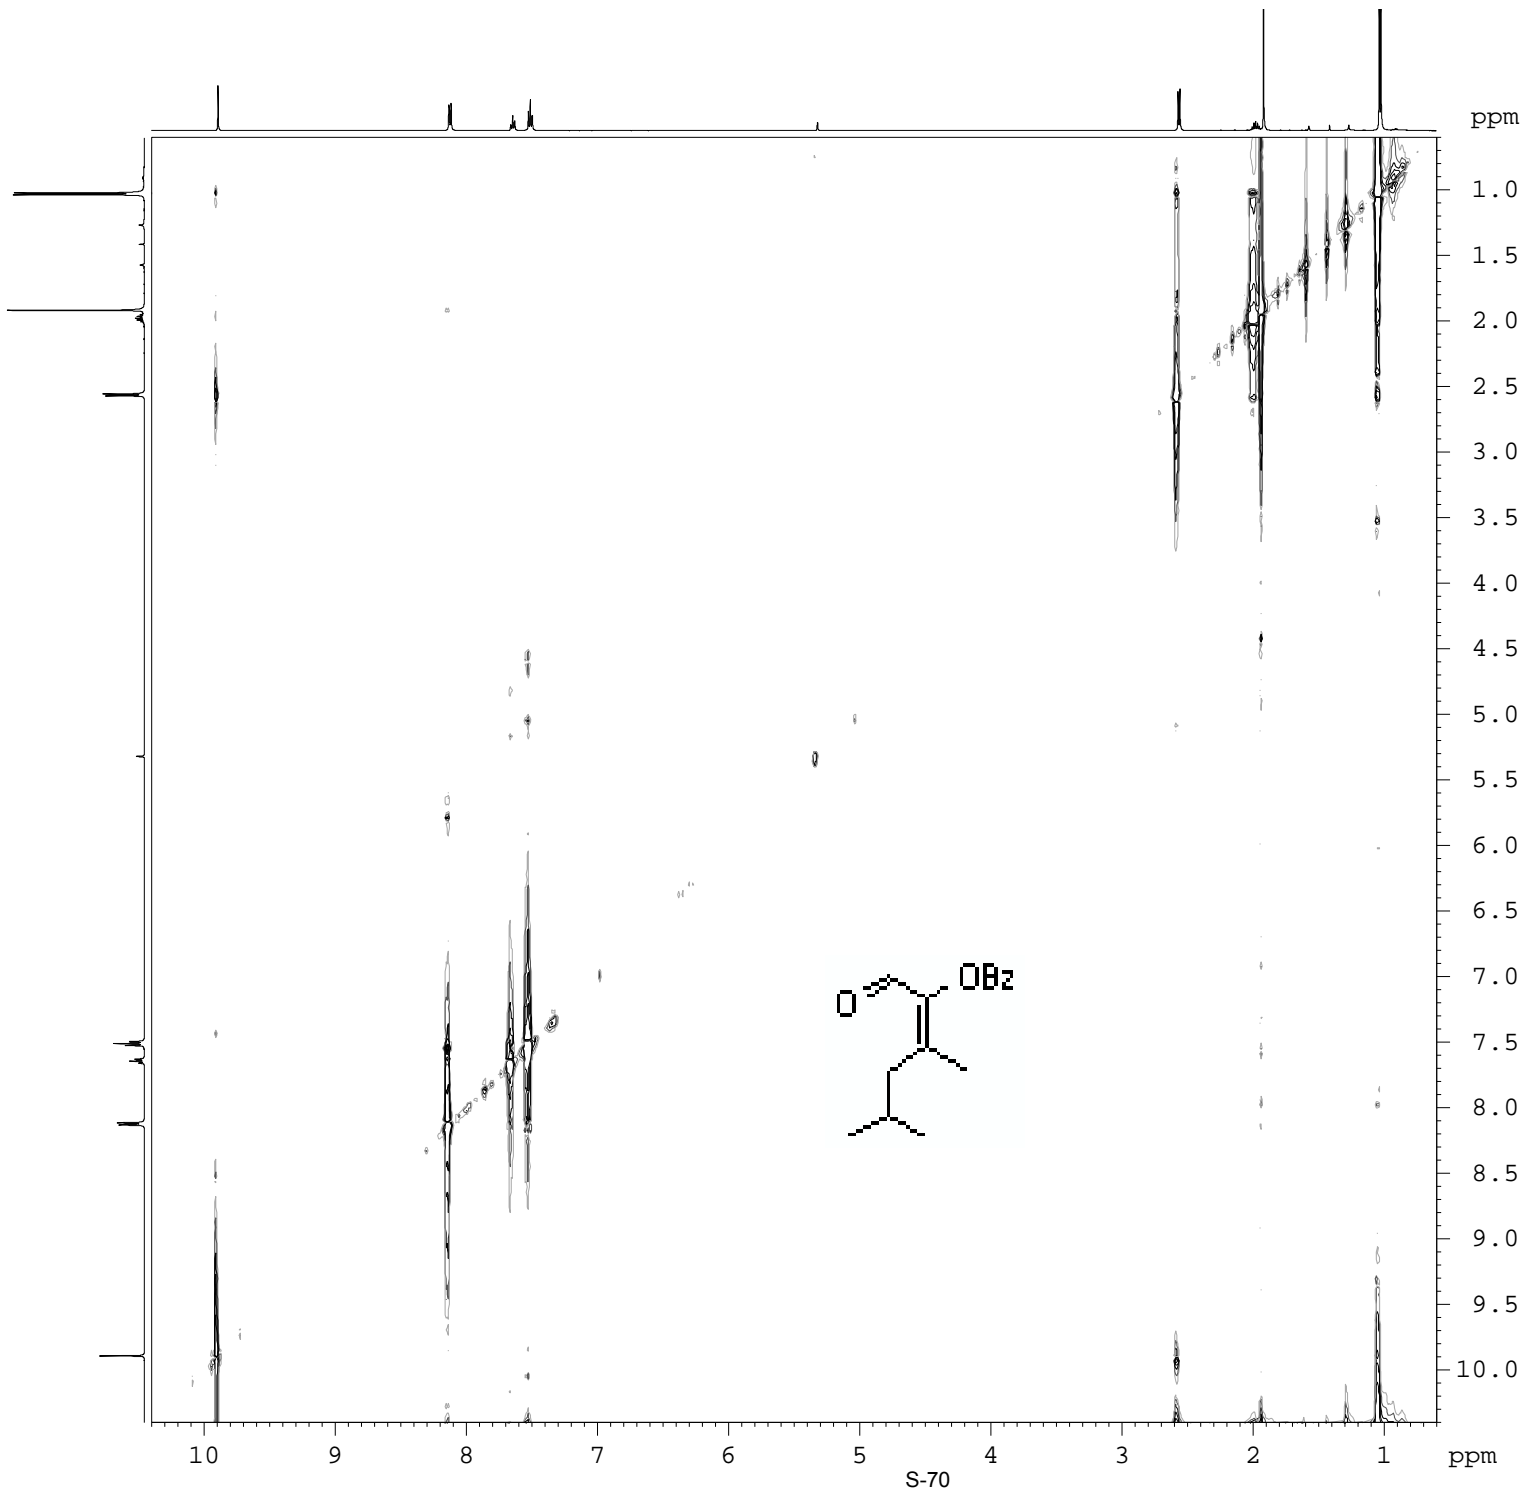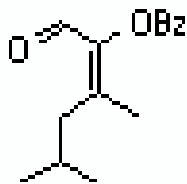

Current Data Parameters  
 NAME 09-133A  
 EXPNO 11  
 PROCNO 1  
 DU /u  
 USER nshapiro

F2 - Acquisition Parameters  
 Date\_ 20080427  
 Time 12.22  
 INSTRUM DRX-500  
 PROBHD 5 mm BBO BB-1H  
 PULPROG noesygpcp  
 TD 2048  
 SOLVENT CDCl3  
 NS 1  
 DS 4  
 SWH 5000.000 Hz  
 FIDRES 2.441406 Hz  
 AQ 0.2048500 sec  
 RG 128  
 DW 100.000 usec  
 DE 7.11 usec  
 TE 293.0 K  
 d0 0.00008444 sec  
 D1 5.00000000 sec  
 D8 1.29999995 sec  
 D16 0.00020000 sec  
 INO 0.00019995 sec  
 MCREST 0.00000000 sec  
 MCWRK 5.00000000 sec  
 TAU 0.64879996 sec

==== CHANNEL f1 =====  
 NUC1 1H  
 P1 12.20 usec  
 P2 24.40 usec  
 PL1 -5.00 dB  
 SFO1 500.1327507 MHz

==== GRADIENT CHANNEL =====  
 GPNAM1 SINE.100  
 GPNAM2 SINE.100  
 GPX1 0.00 %  
 GPX2 0.00 %  
 GPY1 0.00 %  
 GPY2 0.00 %  
 GPZ1 40.00 %  
 GPZ2 -40.00 %  
 P16 1000.00 usec

F1 - Acquisition parameters  
 ND0 1  
 TD 256  
 SFO1 500.1328 MHz  
 FIDRES 19.536135 Hz  
 SW 10.000 ppm  
 FhMODE TPPI

F2 - Processing parameters  
 SI 1024  
 SF 500.1300127 MHz  
 WDW QSINE  
 SSB 2  
 LB 0.00 Hz  
 GB 0  
 PC 5.00

F1 - Processing parameters  
 SI 256  
 MC2 TPPI  
 SF 500.1300128 MHz  
 WDW QSINE  
 SSB 2  
 LB 0.00 Hz  
 GB 0

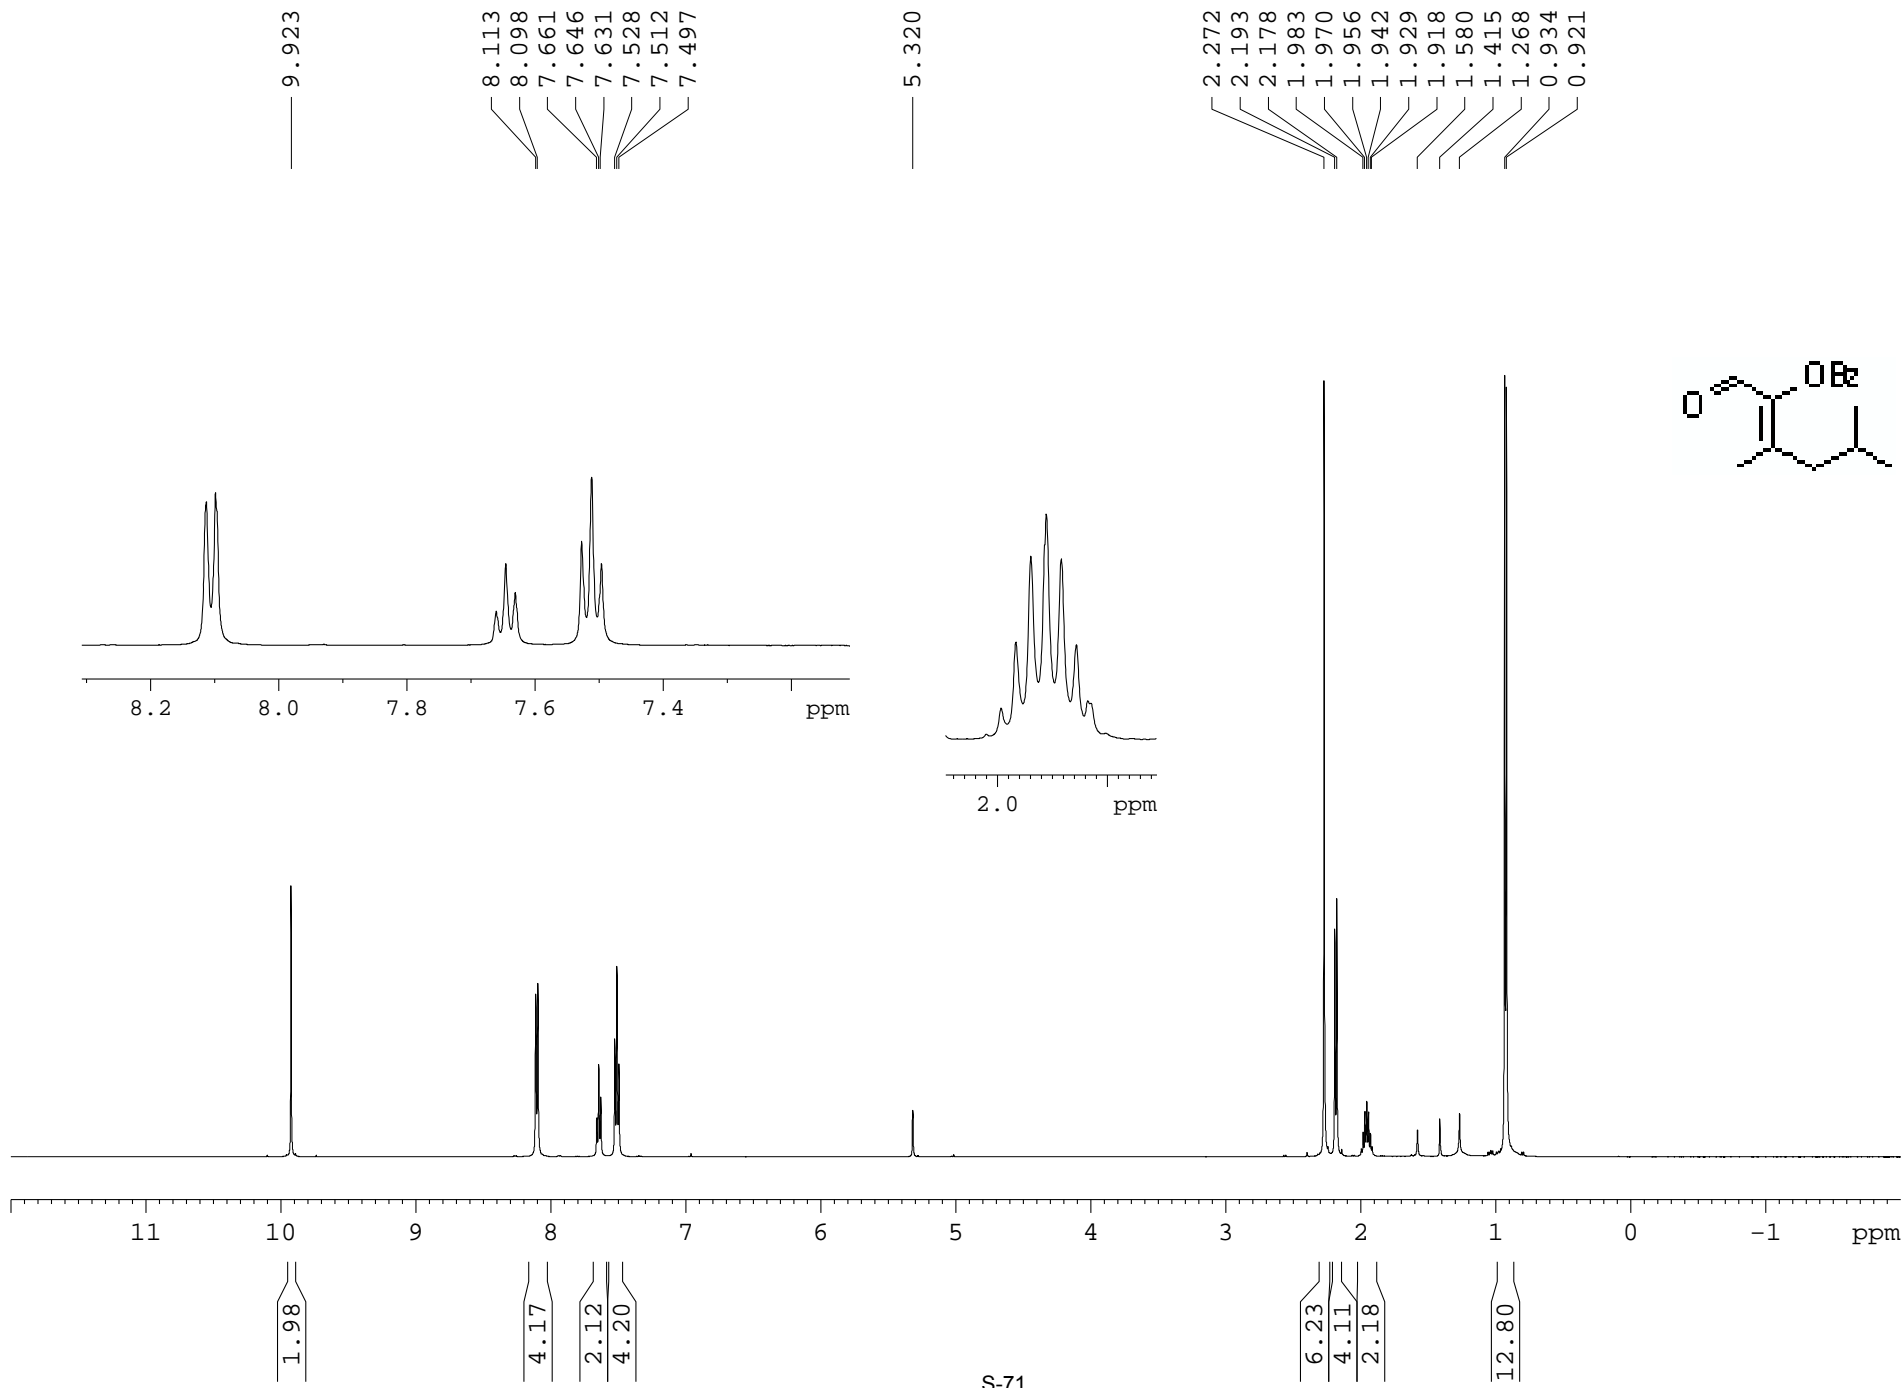

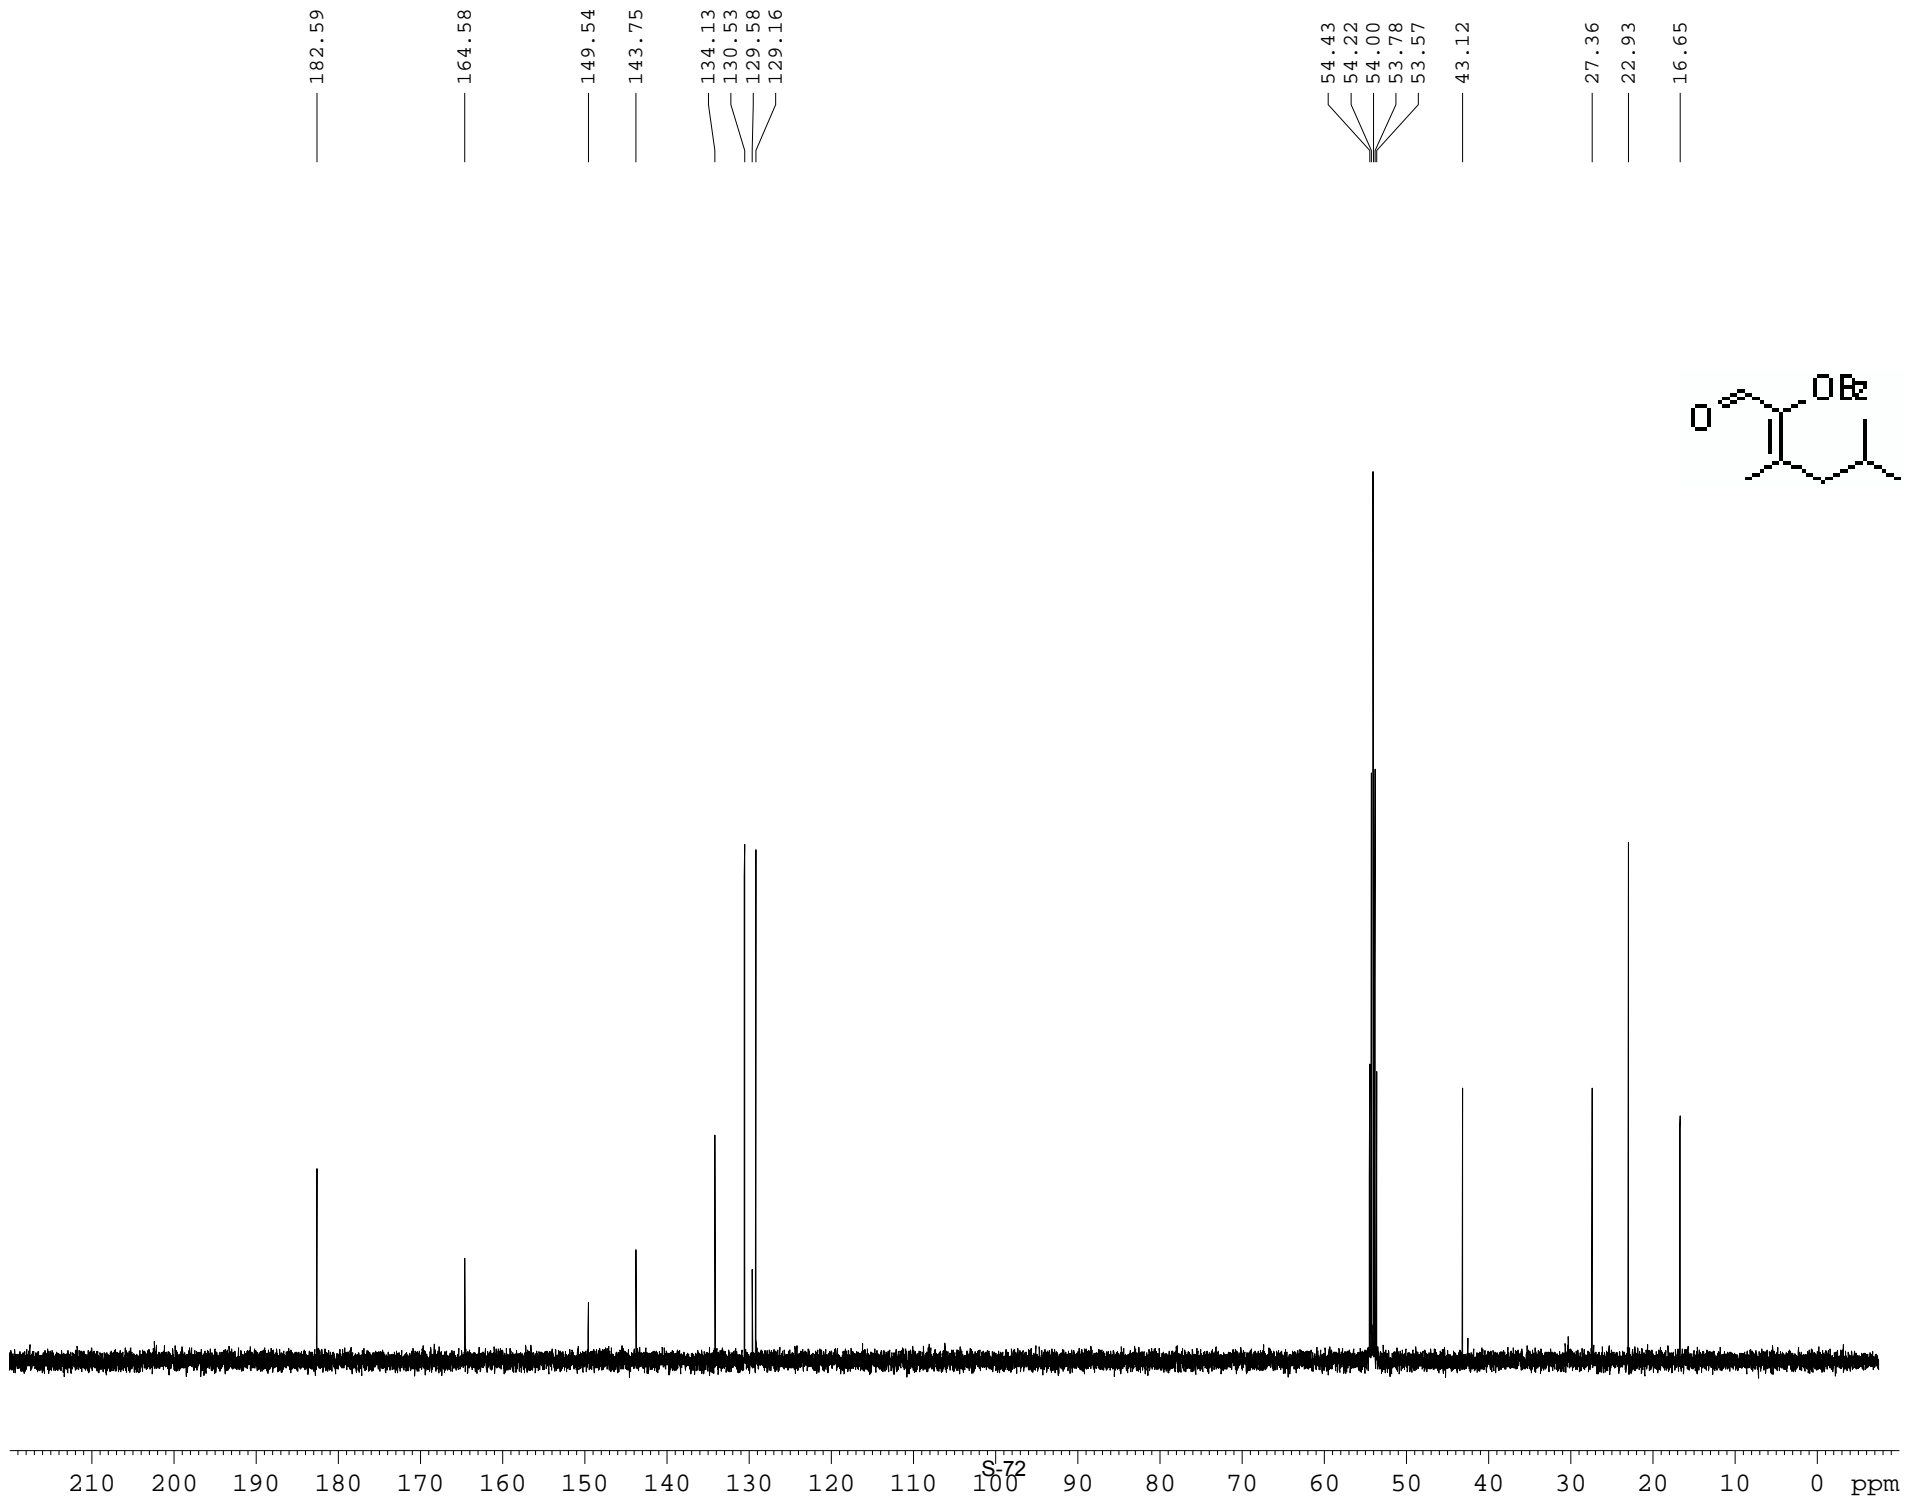

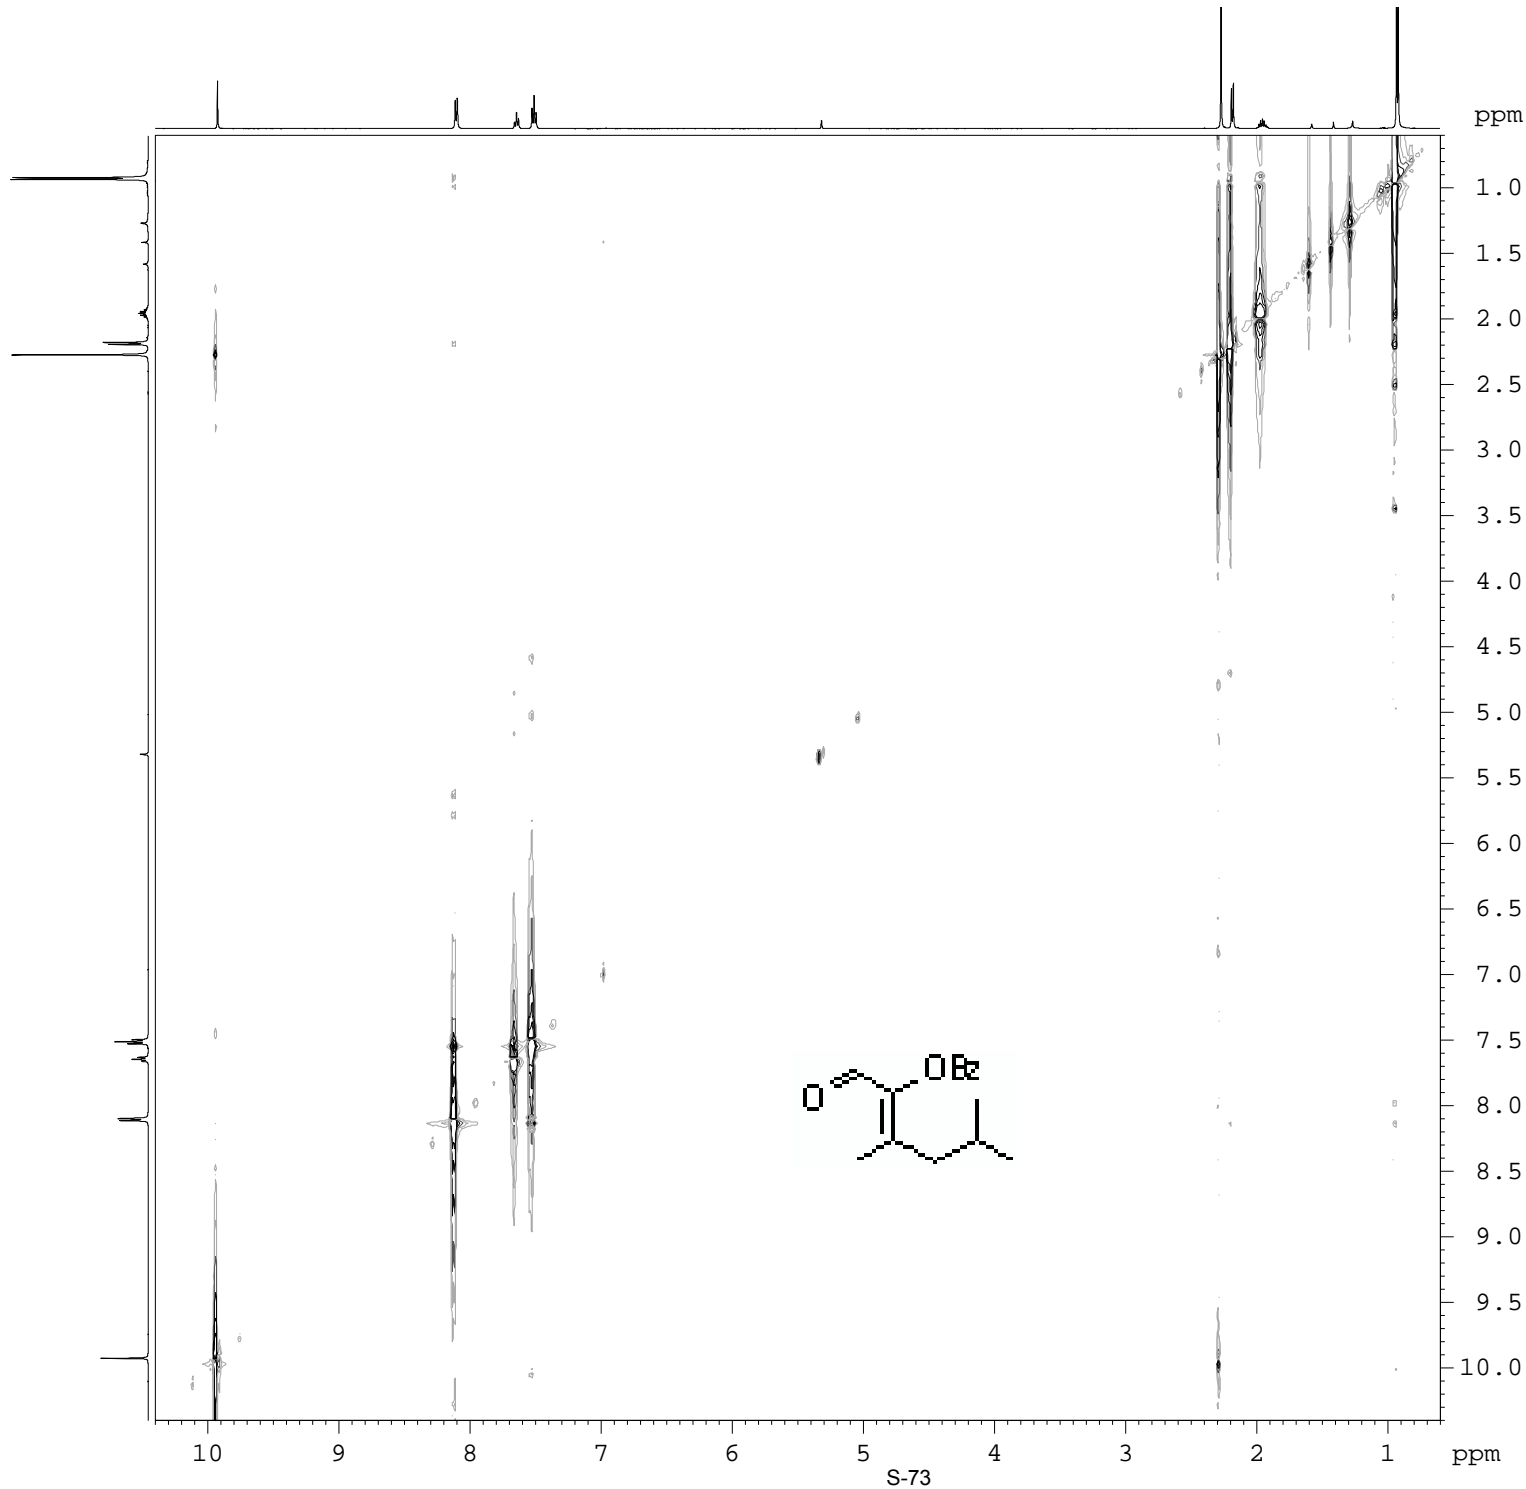

```

Current Data Parameters
NAME          09-133B
EXPNO         11
PROCNO        1
DU            /u
USER          nshapiro

F2 - Acquisition Parameter:
Date_         20080427
Time          14.10
INSTRUM       DRX-500
PROBHD        5 mm BBO BB-1H
PULPROG       noesygpph
TD            2048
SOLVENT       CDCl3
NS            2
DS            4
SWH           5000.000 Hz
FIDRES        2.441406 Hz
AQ            0.2048500 se
RG            128
DW            100.000 us
DE            7.11 us
TE            293.0 K
d0            0.00008444 se
D1            5.00000000 se
D8            1.33000004 se
D16           0.00020000 se
INO           0.00019995 se
MCREST        0.00000000 se
MCWRK         5.00000000 se
TAU           0.66380000 se

===== CHANNEL f1 =====
NUC1           1H
P1             12.20 us
P2             24.40 us
PL1            -5.00 dB
SF01           500.1327507 MHz

===== GRADIENT CHANNEL ==
GPNAM1        SINE.100
GPNAM2        SINE.100
GPX1           0.00 %
GPX2           0.00 %
GPY1           0.00 %
GPY2           0.00 %
GPZ1           40.00 %
GPZ2          -40.00 %
P16           1000.00 us

F1 - Acquisition parameter:
ND0            1
TD             256
SF01           500.1328 MHz
FIDRES         19.536135 Hz
SW             10.000 ppi
FnMODE         TPPI

F2 - Processing parameters
SI             1024
SF             500.1300127 MHz
WDW            QSINE
SSB            2
LB             0.00 Hz
GB             0
PC             5.00

F1 - Processing parameters
SI             256
MC2            TPPI
SF             500.1300128 MHz
WDW            QSINE
SSB            2
LB             0.00 Hz
GB             0
  
```
